# Supplementary material
Source: Research Square preprint supplement (doi:10.21203/rs.3.rs-9053284/v1)
Supplement: Supplementary file 1 [file 9a2322be9417109dbc8fd369.xlsx]

## Sheet: ERAV_lib_2.gene_summary
id	num	neg|score	neg|p-value	neg|fdr	neg|rank	neg|goodsgrna	neg|lfc	pos|score	pos|p-value	pos|fdr	pos|rank	pos|goodsgrna	pos|lfc
ITGA2	5	1	1	1	18788	0	0	1.5917e-16	2.6348e-07	7.9e-05	1	5	4.2421
B4GALT1	5	1	1	1	18787	0	0	3.1884e-13	2.6348e-07	7.9e-05	2	5	3.5118
ST3GAL4	5	1	1	1	18786	0	0	8.9564e-13	2.6348e-07	7.9e-05	3	5	4.2485
SLC10A7	5	1	1	1	18785	0	0	3.8765e-12	2.6348e-07	7.9e-05	4	5	3.4099
PA2G4	5	1	1	1	18784	0	0	4.9663e-12	2.6348e-07	7.9e-05	5	5	3.5931
TRAPPC12	5	1	1	1	18783	0	0	8.612e-12	2.6348e-07	7.9e-05	6	5	2.8503
ASNA1	5	1	1	1	18782	0	0	2.2795e-11	2.6348e-07	7.9e-05	7	5	3.3384
CBLL1	5	1	1	1	18781	0	0	2.7157e-11	2.6348e-07	7.9e-05	8	5	2.1108
SLC39A9	5	1	1	1	18780	0	0	3.0042e-11	2.6348e-07	7.9e-05	9	5	2.6148
TMED2	5	1	1	1	18779	0	0	3.3575e-11	2.6348e-07	7.9e-05	10	5	1.4891
TBC1D15	5	1	1	1	18778	0	0	4.1152e-11	2.6348e-07	7.9e-05	11	5	1.9819
DNAJC13	5	1	1	1	18777	0	0	7.394e-11	2.6348e-07	7.9e-05	12	5	2.0343
COG6	5	1	1	1	18776	0	0	9.2082e-11	2.6348e-07	7.9e-05	13	5	3.0416
TMEM189	5	1	1	1	18775	0	0	2.0339e-10	2.6348e-07	7.9e-05	14	5	1.6914
SEC63	5	1	1	1	18774	0	0	2.3364e-10	2.6348e-07	7.9e-05	15	5	1.4923
UNC50	5	0.99997	0.99999	1	18703	0	0	2.5978e-10	2.6348e-07	7.9e-05	16	5	3.3622
SLC35A1	5	1	1	1	18773	0	0	2.6847e-10	2.6348e-07	7.9e-05	17	5	3.8879
WWOX	5	1	1	1	18772	0	0	4.3548e-10	2.6348e-07	7.9e-05	18	5	1.8294
ARL1	5	1	1	1	18771	0	0	4.7168e-10	2.6348e-07	7.9e-05	19	5	2.0619
ACSL4	5	1	1	1	18770	0	0	6.9287e-10	2.6348e-07	7.9e-05	20	5	1.8542
MGAT1	10	0.33584	0.59592	1	9029	1	-0.38257	7.5235e-10	2.6348e-07	7.9e-05	21	7	1.395
RAB2A	5	1	1	1	18769	0	0	8.4034e-10	2.6348e-07	7.9e-05	22	5	1.6127
PAXBP1	5	1	1	1	18768	0	0	9.0135e-10	2.6348e-07	7.9e-05	23	5	1.2115
AGPS	5	1	1	1	18767	0	0	9.7189e-10	2.6348e-07	7.9e-05	24	5	1.3441
ATP6V1C1	5	1	1	1	18766	0	0	1.0308e-09	2.6348e-07	7.9e-05	25	5	2.5322
COG2	5	0.76934	0.80714	1	14394	1	-0.21193	1.0567e-09	2.6348e-07	7.9e-05	26	4	3.3645
CCDC22	5	1	1	1	18765	0	0	1.0992e-09	2.6348e-07	7.9e-05	27	5	1.5448
UPF3B	5	1	1	1	18764	0	0	1.8276e-09	2.6348e-07	7.9e-05	28	5	1.3103
COG3	5	0.99508	0.9958	1	18463	0	0	1.876e-09	2.6348e-07	7.9e-05	29	5	2.8296
GET4	5	1	1	1	18732	0	0	2.533e-09	2.6348e-07	7.9e-05	30	5	2.612
SEC61B	5	1	1	1	18763	0	0	3.0021e-09	2.6348e-07	7.9e-05	31	5	2.8393
ALG9	5	0.99999	1	1	18713	0	0	3.401e-09	2.6348e-07	7.9e-05	32	5	2.5548
MAN1A1	5	1	1	1	18762	0	0	4.6198e-09	2.6348e-07	7.9e-05	33	5	1.3397
ZNFX1	5	1	1	1	18761	0	0	5.4664e-09	2.6348e-07	7.9e-05	34	5	1.5478
PRDM15	5	1	1	1	18760	0	0	5.6003e-09	2.6348e-07	7.9e-05	35	5	1.2533
COPG1	10	0.97951	0.98315	1	18068	1	-0.13291	5.982e-09	5.2696e-07	0.000155	36	7	1.8653
ALG12	5	0.65917	0.75184	1	13303	1	-0.38598	6.9524e-09	2.6348e-07	7.9e-05	37	4	3.2844
SACM1L	5	1	1	1	18759	0	0	7.4072e-09	2.6348e-07	7.9e-05	38	5	1.885
AP2M1	10	0.99998	0.99999	1	18707	0	0	7.9672e-09	1.0539e-06	0.000283	39	10	1.2889
CAMLG	5	0.49999	0.64882	1	11553	1	-0.58297	9.5791e-09	2.6348e-07	7.9e-05	40	4	3.0735
SSR1	5	1	1	1	18758	0	0	1.0417e-08	2.6348e-07	7.9e-05	41	5	1.516
COG5	5	1	1	1	18757	0	0	1.1489e-08	2.6348e-07	7.9e-05	42	5	2.7353
VMP1	5	1	1	1	18756	0	0	1.2813e-08	2.6348e-07	7.9e-05	43	5	2.7062
SSR3	5	1	1	1	18755	0	0	1.617e-08	2.6348e-07	7.9e-05	44	5	1.2661
FAM3C	5	0.89451	0.90479	1	16318	0	0	1.7248e-08	2.6348e-07	7.9e-05	45	4	2.2314
MNT	4	1	1	1	18754	0	0	1.8133e-08	2.6348e-07	7.9e-05	46	4	3.2304
TM9SF2	5	1	1	1	18747	0	0	1.9754e-08	2.6348e-07	7.9e-05	47	5	1.8372
HNRNPK	5	0.61361	0.73426	1	12911	1	-1.5468	2.2202e-08	2.6348e-07	7.9e-05	48	4	2.8193
WBP4	5	1	1	1	18753	0	0	2.2525e-08	2.6348e-07	7.9e-05	49	5	1.1012
SLC38A10	5	1	1	1	18750	0	0	2.3286e-08	2.6348e-07	7.9e-05	50	5	1.7226
KIAA1432	5	1	1	1	18736	0	0	2.6656e-08	2.6348e-07	7.9e-05	51	5	1.9487
TSPAN13	5	1	1	1	18752	0	0	2.6956e-08	2.6348e-07	7.9e-05	52	5	2.0981
TRIM23	5	1	1	1	18751	0	0	2.7743e-08	2.6348e-07	7.9e-05	53	5	1.5369
VPS54	5	0.99999	1	1	18712	0	0	3.0378e-08	2.6348e-07	7.9e-05	54	5	2.0423
ATP6V1H	5	1	1	1	18740	0	0	3.2876e-08	2.6348e-07	7.9e-05	55	5	2.0737
SETDB1	5	1	1	1	18749	0	0	3.7451e-08	2.6348e-07	7.9e-05	56	5	1.0136
ATP6AP1	5	1	1	1	18748	0	0	3.7903e-08	2.6348e-07	7.9e-05	57	5	2.5576
MYLIP	5	1	1	1	18746	0	0	4.2793e-08	2.6348e-07	7.9e-05	58	5	0.99849
UPF2	5	0.99986	0.99991	1	18676	0	0	4.5703e-08	2.6348e-07	7.9e-05	59	5	1.8669
FAR1	5	1	1	1	18745	0	0	4.6613e-08	2.6348e-07	7.9e-05	60	5	1.4879
TMF1	5	1	1	1	18744	0	0	5.6229e-08	2.6348e-07	7.9e-05	61	5	2.0137
CLINT1	5	1	1	1	18743	0	0	5.7962e-08	2.6348e-07	7.9e-05	62	5	1.0271
HEXIM1	5	1	1	1	18742	0	0	6.3077e-08	2.6348e-07	7.9e-05	63	5	1.1907
ELF2	5	1	1	1	18741	0	0	8.3362e-08	2.6348e-07	7.9e-05	64	5	0.65098
NUFIP2	5	0.94509	0.94916	1	17344	0	0	8.3908e-08	2.6348e-07	7.9e-05	65	4	2.0197
SMARCC1	5	1	1	1	18739	0	0	9.0187e-08	7.9044e-07	0.000215	66	5	1.055
ATP6AP2	5	0.99801	0.99828	1	18563	0	0	1.1194e-07	7.9044e-07	0.000215	67	5	1.7339
PEX7	5	1	1	1	18738	0	0	1.2152e-07	7.9044e-07	0.000215	68	5	1.3396
CAB39	5	1	1	1	18737	0	0	1.2875e-07	7.9044e-07	0.000215	69	5	2.1077
CNOT4	5	1	1	1	18735	0	0	1.6083e-07	7.9044e-07	0.000215	70	5	1.4832
SEC14L1	10	0.81009	0.91517	1	14900	1	-0.78717	1.6128e-07	3.9522e-06	0.001003	71	9	1.115
MESDC2	5	1	1	1	18733	0	0	1.8891e-07	1.3174e-06	0.000349	72	5	2.2964
COG7	5	0.99476	0.99541	1	18455	0	0	2.1562e-07	1.8443e-06	0.000475	73	5	2.3622
GORASP2	5	0.99994	0.99997	1	18695	0	0	2.1679e-07	1.8443e-06	0.000475	74	5	1.0004
PHF23	5	1	1	1	18734	0	0	2.4589e-07	6.06e-06	0.001518	75	5	0.77591
C15orf57	5	1	1	1	18730	0	0	2.6155e-07	6.587e-06	0.001607	76	5	1.4828
EPT1	5	0.31922	0.49219	1	8760	1	-0.38853	2.6494e-07	6.587e-06	0.001607	77	4	1.8439
LARP7	5	0.99993	0.99996	1	18690	0	0	3.2305e-07	8.1678e-06	0.001968	78	5	1.1897
PCYT2	5	0.8002	0.82411	1	14773	1	-0.65177	3.5671e-07	1.3964e-05	0.002766	79	4	2.6352
ZC3H13	5	0.98851	0.98953	1	18256	0	0	3.8476e-07	1.3964e-05	0.002766	80	4	0.99316
TRAPPC13	5	0.95271	0.95572	1	17512	0	0	4.2695e-07	1.4491e-05	0.002766	81	4	1.9446
OSBPL11	5	0.97332	0.97518	1	17935	0	0	4.2988e-07	1.4491e-05	0.002766	82	4	1.8021
RALGAPB	5	1	1	1	18731	0	0	4.9022e-07	1.4491e-05	0.002766	83	5	0.90054
NELFE	5	1	1	1	18729	0	0	5.4727e-07	1.4491e-05	0.002766	84	5	1.3795
FCHO2	5	0.99986	0.99991	1	18677	0	0	5.5761e-07	1.4491e-05	0.002766	85	5	1.0729
GOLIM4	5	0.99997	0.99999	1	18701	0	0	5.6119e-07	1.4491e-05	0.002766	86	5	1.032
AHNAK	10	0.99672	0.99739	1	18516	0	0	6.1538e-07	1.2383e-05	0.002766	87	9	0.77495
RIC8A	10	1	1	1	18723	0	0	7.3513e-07	1.818e-05	0.003316	88	10	0.62442
TMED10	5	0.99967	0.99974	1	18652	0	0	7.9832e-07	1.4491e-05	0.002766	89	5	1.1583
ATXN2L	5	0.9019	0.91184	1	16475	0	0	8.299e-07	1.4491e-05	0.002766	90	4	2.0348
TM9SF3	5	1	1	1	18728	0	0	8.4034e-07	1.4491e-05	0.002766	91	5	0.96969
TMEM30A	5	0.93262	0.94056	1	17096	0	0	8.5747e-07	1.4491e-05	0.002766	92	4	1.1278
RSRC2	5	0.96195	0.96344	1	17708	0	0	8.7734e-07	1.4491e-05	0.002766	93	4	2.0311
C16orf80	5	0.99972	0.99978	1	18659	0	0	9.1122e-07	1.4491e-05	0.002766	94	5	1.0623
UBAP2L	5	1	1	1	18727	0	0	9.3435e-07	1.4491e-05	0.002766	95	5	1.3251
C17orf49	10	0.98018	0.98325	1	18079	1	-0.11928	1.033e-06	2.2923e-05	0.004141	96	7	1.3079
SSR2	5	0.31262	0.48629	1	8658	1	-0.58184	1.2038e-06	1.5018e-05	0.002766	97	4	1.3152
ARID1A	5	0.99992	0.99995	1	18689	0	0	1.2576e-06	1.5018e-05	0.002766	98	5	1.0238
TRAPPC8	5	1	1	1	18726	0	0	1.3569e-06	1.5018e-05	0.002766	99	5	1.1442
YPEL5	5	0.98779	0.9888	1	18238	0	0	1.4369e-06	1.5018e-05	0.002766	100	4	1.3863
ZDHHC16	5	0.59895	0.7284	1	12805	1	-0.22344	1.4809e-06	1.5018e-05	0.002766	101	4	1.2147
TGIF2	5	1	1	1	18725	0	0	1.5029e-06	1.5018e-05	0.002766	102	5	0.86783
OSBPL9	5	0.99997	0.99999	1	18702	0	0	1.6348e-06	1.5018e-05	0.002766	103	5	0.9493
SMARCE1	5	0.84842	0.85983	1	15484	1	-0.22447	1.6562e-06	1.5018e-05	0.002766	104	4	2.7295
WDR7	5	0.99999	1	1	18709	0	0	2.126e-06	6.0337e-05	0.009378	105	5	1.8227
PHF3	5	1	1	1	18724	0	0	2.1972e-06	6.0337e-05	0.009378	106	5	0.96173
PEX6	5	1	1	1	18722	0	0	2.5567e-06	6.0337e-05	0.009378	107	5	2.3061
GOSR1	5	0.99547	0.99611	1	18473	0	0	2.5978e-06	6.0337e-05	0.009378	108	5	1.3192
GATA6	5	0.9974	0.99781	1	18541	0	0	3.0962e-06	6.0864e-05	0.009378	109	5	0.74091
ITPA	5	0.99071	0.99141	1	18323	0	0	3.1091e-06	6.0864e-05	0.009378	110	4	1.2895
OSBPL8	5	0.99987	0.99992	1	18679	0	0	3.4443e-06	6.0864e-05	0.009378	111	5	1.0781
ITGB1	5	0.96078	0.96232	1	17681	0	0	3.5942e-06	6.0864e-05	0.009378	112	4	2.4115
AP2S1	5	0.80252	0.82499	1	14803	1	-0.15469	3.8206e-06	6.0864e-05	0.009378	113	3	2.3612
HNRNPA2B1	5	0.88962	0.90061	1	16216	0	0	3.8915e-06	6.0864e-05	0.009378	114	4	1.4487
COA5	5	0.82191	0.83767	1	15074	1	-0.64113	3.9609e-06	6.0864e-05	0.009378	115	4	2.3652
METTL3	5	1	1	1	18721	0	0	4.1237e-06	6.0864e-05	0.009378	116	5	0.7377
TRIP11	5	0.93665	0.94356	1	17190	0	0	4.2186e-06	6.0864e-05	0.009378	117	4	1.6684
CSNK2B	5	0.99992	0.99995	1	18688	0	0	4.2327e-06	6.0864e-05	0.009378	118	5	0.9339
YY1	5	1	1	1	18720	0	0	4.633e-06	6.139e-05	0.009378	119	5	1.3208
SND1	5	1	1	1	18719	0	0	4.6676e-06	6.139e-05	0.009378	120	5	0.70949
CDKN2AIP	5	0.99999	1	1	18718	0	0	5.2971e-06	6.139e-05	0.009378	121	5	0.54584
COG1	5	0.61622	0.73472	1	12927	1	-0.38672	5.9398e-06	6.139e-05	0.009378	122	4	2.3657
CNIH4	5	0.99999	1	1	18717	0	0	5.9731e-06	6.1917e-05	0.009382	123	5	0.93034
RGP1	4	0.99999	1	1	18716	0	0	7.0075e-06	4.5055e-05	0.008062	124	4	1.9952
ATF7IP	10	0.88353	0.94764	1	16109	1	-0.20619	7.0354e-06	0.00013569	0.018342	125	6	0.6269
GTF3C2	5	0.96139	0.9627	1	17698	0	0	7.5773e-06	6.666e-05	0.009789	126	4	1.664
UBE2G2	5	0.99999	1	1	18715	0	0	7.6145e-06	6.666e-05	0.009789	127	5	1.0705
SLC30A7	5	0.99999	1	1	18714	0	0	8.1003e-06	6.7187e-05	0.009789	128	5	0.83851
BOD1L1	10	0.52279	0.76424	1	11903	2	-0.28547	8.4318e-06	0.00017152	0.022226	129	7	0.5996
FAM160B1	4	0.97187	0.97374	1	17901	0	0	8.9783e-06	9.3008e-05	0.013041	130	3	1.2948
MBD6	5	0.99789	0.9982	1	18559	0	0	8.9914e-06	6.8241e-05	0.009789	131	5	0.72032
UVRAG	5	0.99998	0.99999	1	18705	0	0	9.1554e-06	6.8241e-05	0.009789	132	5	1.7472
PTBP1	5	0.74258	0.79251	1	14104	1	-1.1534	9.2023e-06	6.8241e-05	0.009789	133	4	1.6997
ZBTB7A	10	0.62456	0.82326	1	12998	1	-0.31333	9.2506e-06	0.00023054	0.02759	134	8	0.72759
VPS53	5	0.99768	0.99805	1	18550	0	0	1.048e-05	6.8768e-05	0.009789	135	5	1.4093
RAB1A	5	0.99212	0.99283	1	18370	0	0	1.0938e-05	6.9295e-05	0.009789	136	4	1.0207
SEC61G	5	0.67629	0.75956	1	13461	1	-0.23733	1.1062e-05	6.9295e-05	0.009789	137	4	2.1687
SLC35A2	5	0.99951	0.99961	1	18642	0	0	1.1383e-05	9.617e-05	0.013359	138	5	1.0403
HSP90AB1	5	0.99999	1	1	18711	0	0	1.2033e-05	9.6697e-05	0.013359	139	5	0.67304
PEX13	5	0.99999	1	1	18710	0	0	1.2425e-05	0.0001241	0.016896	140	5	0.97918
SENP1	5	0.99619	0.99694	1	18492	0	0	1.3053e-05	0.00016151	0.021418	141	5	0.75263
TSSC1	5	0.99736	0.99779	1	18540	0	0	1.3281e-05	0.00016204	0.021418	142	5	1.5803
DUS4L	4	0.8263	0.83871	1	15152	0	0	1.3751e-05	0.00011883	0.016297	143	3	1.3634
RPN1	5	0.99293	0.99368	1	18399	0	0	1.4219e-05	0.00016309	0.021418	144	5	1.2903
SCFD1	5	0.99779	0.99815	1	18552	0	0	1.5009e-05	0.00016362	0.021418	145	5	1.4704
WRB	5	0.99998	1	1	18708	0	0	1.5439e-05	0.00016415	0.021418	146	5	1.5661
KDELR1	5	0.9322	0.94002	1	17087	0	0	1.8332e-05	0.00020683	0.02648	147	4	0.98989
PISD	10	0.98251	0.98524	1	18132	1	-0.1904	1.8828e-05	0.00032276	0.037667	148	7	0.78477
ERH	5	0.65982	0.75184	1	13309	1	-1.4322	1.9203e-05	0.00020788	0.02648	149	4	1.6393
EWSR1	5	0.81499	0.83178	1	14965	1	-0.22658	2.063e-05	0.00020947	0.02648	150	4	1.2106
DRAP1	5	0.99998	0.99999	1	18706	0	0	2.2091e-05	0.00020999	0.02648	151	5	0.71475
FOXK1	5	0.99998	0.99999	1	18704	0	0	2.3418e-05	0.0002121	0.026568	152	5	0.57078
SLC33A1	5	0.96186	0.96344	1	17706	0	0	2.3899e-05	0.00021368	0.026588	153	4	0.84608
SCYL3	5	0.99997	0.99998	1	18699	0	0	2.641e-05	0.00021948	0.026815	154	5	0.67645
C10orf76	5	0.40128	0.56094	1	10089	2	-0.54357	2.8241e-05	0.00022	0.026815	155	3	2.3857
GABPB1	5	0.99997	0.99999	1	18700	0	0	2.9065e-05	0.00022	0.026815	156	5	1.0295
ATP6V1E1	5	0.4299	0.58436	1	10494	1	-0.46295	3.0565e-05	0.00022211	0.026815	157	4	1.3438
ALKBH8	5	0.99817	0.99836	1	18575	0	0	3.1056e-05	0.00022264	0.026815	158	5	0.87088
YLPM1	5	0.99997	0.99998	1	18698	0	0	3.2353e-05	0.00027165	0.031962	159	5	1.1581
CCDC93	5	0.94077	0.9472	1	17267	0	0	3.2691e-05	0.00027165	0.031962	160	3	1.3664
AQP2	5	0.99997	0.99998	1	18697	0	0	3.282e-05	0.00027217	0.031962	161	5	0.57144
TICAM2	10	0.89732	0.95456	1	16385	2	-0.15003	3.5869e-05	0.00039337	0.044436	162	8	0.80775
PHF8	5	0.99784	0.99817	1	18556	0	0	3.7024e-05	0.00033277	0.03848	163	5	0.66214
DCAF8	10	0.49339	0.74813	1	11463	2	-0.31455	3.7127e-05	0.00039495	0.044436	164	7	1.0922
ZNF511	5	0.76609	0.80667	1	14363	1	-0.2803	3.9399e-05	0.00033383	0.03848	165	4	3.3243
CTDSPL2	5	0.99962	0.9997	1	18651	0	0	4.2718e-05	0.00033752	0.038494	166	5	0.98894
CCDC115	5	0.67229	0.75867	1	13426	1	-0.48125	4.3163e-05	0.00033804	0.038494	167	3	1.3624
RBM27	5	0.99567	0.99638	1	18480	0	0	4.5071e-05	0.0004018	0.044443	168	5	0.77694
ASXL2	5	0.99995	0.99998	1	18696	0	0	4.7041e-05	0.00040918	0.044443	169	5	0.62348
GOLPH3L	5	0.65683	0.74914	1	13276	1	-0.64701	4.7224e-05	0.00040918	0.044443	170	4	1.082
TSPAN3	5	0.74104	0.79068	1	14090	1	-0.24772	5.1048e-05	0.00041392	0.044443	171	3	1.455
ALG13	5	0.99949	0.99961	1	18637	0	0	5.2498e-05	0.00041551	0.044443	172	5	1.2934
TRAPPC11	5	0.8879	0.89806	1	16182	0	0	5.5091e-05	0.00041709	0.044443	173	4	1.7075
TRAM2	5	0.99989	0.99993	1	18683	0	0	5.6088e-05	0.00041709	0.044443	174	5	0.8814
NCSTN	5	0.99994	0.99997	1	18694	0	0	5.6776e-05	0.00041761	0.044443	175	5	1.3087
HDAC1	5	0.99994	0.99997	1	18693	0	0	5.6894e-05	0.00041761	0.044443	176	5	0.62198
HSP90B1	5	0.99994	0.99997	1	18692	0	0	5.8652e-05	0.00041867	0.044443	177	5	0.87678
USP22	5	0.27109	0.45499	1	8040	1	-0.46725	6.1751e-05	0.00042341	0.044694	178	4	1.044
S100B	5	0.99994	0.99997	1	18691	0	0	6.2959e-05	0.00049191	0.051327	179	5	0.98401
PEX12	5	0.9997	0.99977	1	18657	0	0	6.4223e-05	0.00049455	0.051327	180	5	1.9171
MTMR9	5	0.9999	0.99994	1	18686	0	0	6.8172e-05	0.00049692	0.051327	181	5	0.76838
GTF3C1	5	0.82629	0.8395	1	15151	1	-0.17525	6.8822e-05	0.00049718	0.051327	182	4	1.8705
TMEM115	5	0.81218	0.82996	1	14934	1	-0.60378	7.3198e-05	0.00055673	0.056292	183	4	0.9864
HNRNPA1	5	0.98302	0.98389	1	18145	0	0	7.3525e-05	0.00055726	0.056292	184	4	0.87009
OR2A4	5	0.84286	0.85483	1	15412	1	-0.12147	7.366e-05	0.00055726	0.056292	185	3	2.8718
PPA1	5	0.058938	0.13906	0.854472	3047	1	-1.4569	7.935e-05	0.00056622	0.056891	186	3	1.5811
CCDC71	5	0.99992	0.99995	1	18687	0	0	8.4398e-05	0.0005699	0.056957	187	5	0.44058
UBE2H	5	0.99275	0.9936	1	18391	0	0	8.6568e-05	0.00057307	0.05697	188	5	0.56738
ZNF226	10	0.47773	0.74	1	11223	1	-0.32997	9.0346e-05	0.0011021	0.089426	189	8	0.40933
RWDD4	5	0.47684	0.62706	1	11201	2	-0.15753	9.3552e-05	0.00066054	0.065134	190	3	1.5614
ALG3	5	0.97049	0.97241	1	17868	0	0	9.5096e-05	0.00074538	0.072379	191	4	1.4956
SAE1	5	0.9997	0.99977	1	18655	0	0	9.8582e-05	0.00074696	0.072379	192	5	1.7723
TMEM135	5	0.99902	0.99913	1	18614	0	0	9.8979e-05	0.00074749	0.072379	193	5	0.70248
SEL1L	5	0.75282	0.79986	1	14222	1	-0.14224	0.00010253	0.00075118	0.072379	194	4	2.1779
SIX6	5	0.9999	0.99994	1	18685	0	0	0.00010492	0.0008376	0.079886	195	5	0.41136
TMEM8B	5	0.99989	0.99993	1	18684	0	0	0.00010631	0.00093298	0.085563	196	5	0.55745
WDFY1	5	0.99591	0.99666	1	18485	0	0	0.00010697	0.0009335	0.085563	197	5	0.59092
GOLPH3	5	0.9971	0.99756	1	18533	0	0	0.00010806	0.0009335	0.085563	198	5	0.72589
TMED7	5	0.7732	0.80714	1	14431	1	-0.4363	0.00011019	0.00093508	0.085563	199	4	1.119
AGFG1	5	0.99989	0.99993	1	18682	0	0	0.00011373	0.00093825	0.085563	200	5	0.68871
ATP6V1G1	5	0.99924	0.99935	1	18628	0	0	0.00011575	0.00093877	0.085563	201	5	1.1336
MTRR	5	0.99863	0.99874	1	18598	0	0	0.00011748	0.00094035	0.085563	202	5	0.68906
PSMB9	10	0.4101	0.67752	1	10207	2	-0.65853	0.00011812	0.001159	0.090422	203	7	0.65884
SPTLC2	5	0.96464	0.96601	1	17761	0	0	0.00012106	0.00094194	0.085563	204	4	1.0823
IRX1	5	0.99271	0.99356	1	18389	0	0	0.00012418	0.00094615	0.085563	205	5	0.62387
ECD	5	0.99987	0.99992	1	18681	0	0	0.00012624	0.00094668	0.085563	206	5	0.76755
SPTSSA	5	0.99987	0.99992	1	18680	0	0	0.0001268	0.0009472	0.085563	207	5	1.7536
TMEM168	5	0.99987	0.99992	1	18678	0	0	0.00013486	0.00105	0.089426	208	5	0.53061
KIR3DL1	10	0.084376	0.22799	0.97123	3754	4	-0.25608	0.00013626	0.0012012	0.091245	209	3	4.513
HNRNPA0	5	0.99951	0.99961	1	18641	0	0	0.00014033	0.0010536	0.089426	210	5	0.81729
ARID3A	5	0.23497	0.42261	1	7494	2	-0.34275	0.00014747	0.0010647	0.089426	211	2	5.566
CSNK2A1	5	0.7657	0.80577	1	14360	1	-0.458	0.00014751	0.0010647	0.089426	212	4	0.99529
SF1	5	0.99839	0.9986	1	18583	0	0	0.00014751	0.0010647	0.089426	213	5	0.57684
FNBP4	5	0.99985	0.99991	1	18675	0	0	0.00014913	0.0010652	0.089426	214	5	1.556
TBC1D20	5	0.99985	0.9999	1	18674	0	0	0.00015072	0.00107	0.089426	215	5	0.67505
PDHB	5	0.98878	0.98961	1	18266	0	0	0.00015671	0.0010747	0.089426	216	4	0.83205
VPS13B	5	0.99984	0.9999	1	18673	0	0	0.00015866	0.0010753	0.089426	217	5	0.65093
2022-09-05	10	0.092209	0.24285	0.97123	3946	2	-0.58928	0.00015885	0.0016481	0.107519	218	8	1.1275
ECH1	5	0.99983	0.99989	1	18672	0	0	0.00016953	0.0010879	0.089426	219	5	0.3828
SGCG	4	0.70872	0.73666	1	13766	1	-0.25154	0.00017678	0.00066212	0.065134	220	3	2.894
TRIM28	5	0.99982	0.99989	1	18671	0	0	0.00017791	0.0010926	0.089426	221	5	0.54321
TMEM164	5	0.99911	0.99923	1	18617	0	0	0.00017899	0.0010926	0.089426	222	5	1.0795
YAP1	5	0.86281	0.87173	1	15743	1	-0.085864	0.00017983	0.0010932	0.089426	223	4	0.5837
TIAL1	5	0.99982	0.99989	1	18670	0	0	0.00018083	0.0010932	0.089426	224	5	0.4033
DHDDS	5	0.98524	0.98637	1	18192	0	0	0.000183	0.0010932	0.089426	225	3	1.2033
FAM219A	5	0.90807	0.91852	1	16612	0	0	0.00018586	0.0010995	0.089426	226	4	0.54777
NAA15	5	0.99981	0.99988	1	18669	0	0	0.00018653	0.0011	0.089426	227	5	0.73236
PIAS4	5	0.99266	0.9935	1	18386	0	0	0.00018813	0.0011032	0.089426	228	5	0.62305
OR51E1	5	0.98774	0.9888	1	18237	0	0	0.00018941	0.0011032	0.089426	229	4	0.74934
MAPKAPK2	5	0.97697	0.97799	1	18011	0	0	0.00019116	0.0011037	0.089426	230	4	0.56969
SRSF6	10	0.26995	0.52512	1	8023	2	-0.44319	0.00019299	0.001745	0.10929	231	7	0.80179
MAP7D1	5	0.99981	0.99988	1	18668	0	0	0.00019362	0.001109	0.089426	232	5	0.49989
HOOK3	5	0.97351	0.97518	1	17941	0	0	0.00019432	0.001109	0.089426	233	4	0.83231
DAGLB	5	0.98794	0.98887	1	18240	0	0	0.0001996	0.0011116	0.089426	234	4	0.93208
TMEM55B	5	0.9998	0.99987	1	18667	0	0	0.00019964	0.0011116	0.089426	235	5	0.59657
FITM1	5	0.88099	0.89098	1	16051	0	0	0.00020097	0.0011137	0.089426	236	3	3.3044
ZFAT	10	0.98447	0.98698	1	18178	1	-0.075482	0.00020304	0.0020233	0.120682	237	6	0.71823
GOLGA2	5	0.99968	0.99976	1	18654	0	0	0.00021068	0.0011364	0.090422	238	5	1.8833
ZFP36L2	5	0.99976	0.99982	1	18662	0	0	0.0002123	0.0011411	0.090422	239	5	0.82121
CSNK1D	5	0.99978	0.99985	1	18666	0	0	0.00021639	0.001148	0.090422	240	5	1.4861
DIDO1	10	0.47648	0.74	1	11193	4	-0.21018	0.00022082	0.0020828	0.123841	241	5	0.68906
PTGER3	5	0.94764	0.95179	1	17391	0	0	0.0002211	0.0011506	0.090422	242	4	0.73789
COL4A3BP	5	0.99976	0.99982	1	18664	0	0	0.00022881	0.0011696	0.090422	243	5	0.64026
PDXDC1	5	0.9871	0.98819	1	18222	0	0	0.00023381	0.0011759	0.090422	244	4	1.8447
M6PR	5	0.99976	0.99982	1	18665	0	0	0.00023541	0.0011785	0.090422	245	5	0.50314
DAD1	5	0.99975	0.99981	1	18661	0	0	0.0002376	0.0011785	0.090422	246	5	0.94246
ABHD12	5	0.99976	0.99982	1	18663	0	0	0.00023806	0.0011791	0.090422	247	5	0.53944
CLASRP	5	0.99861	0.99873	1	18595	0	0	0.0002414	0.0011791	0.090422	248	5	0.88332
SATB1	10	0.028583	0.095688	0.769672	1845	6	-0.27799	0.00024551	0.0021518	0.127141	249	3	2.6791
CEPT1	5	0.96075	0.96232	1	17680	0	0	0.00025098	0.0012044	0.091245	250	4	1.1999
KIAA1522	10	0.55597	0.78168	1	12411	2	-0.73334	0.00025329	0.0021755	0.128139	251	7	0.64412
SLC39A7	4	0.9676	0.96996	1	17803	0	0	0.00026177	0.00081336	0.07797	252	3	1.9446
TP53TG5	5	0.66142	0.75184	1	13329	1	-0.26967	0.00027007	0.001226	0.092196	253	2	3.9108
ATXN7L3B	5	0.99972	0.99979	1	18660	0	0	0.00028063	0.0012386	0.092196	254	5	0.68268
PHF2	5	0.99561	0.99623	1	18478	0	0	0.00028078	0.0012391	0.092196	255	5	0.35666
SPSB3	5	0.822	0.83767	1	15075	1	-0.20398	0.00028337	0.0012444	0.092196	256	4	0.75532
NUDCD3	5	0.99971	0.99978	1	18658	0	0	0.00028619	0.0012486	0.092196	257	5	1.765
FOXC1	5	0.99167	0.99241	1	18357	0	0	0.0002906	0.0012513	0.092196	258	4	0.76991
DYM	5	0.98978	0.99068	1	18298	0	0	0.00029125	0.0012513	0.092196	259	4	1.2411
TDG	5	0.90268	0.91222	1	16493	0	0	0.00029751	0.0012665	0.092634	260	4	2.0577
TBL1X	5	0.9997	0.99977	1	18656	0	0	0.00029847	0.0012671	0.092634	261	5	0.43866
LPCAT3	5	0.9505	0.95414	1	17458	0	0	0.0003158	0.0012871	0.09341	262	4	0.58505
L3MBTL3	5	0.0096197	0.025697	0.524779	921	4	-0.37524	0.00031916	0.0012876	0.09341	263	1	7.555
TRA2B	5	0.99968	0.99976	1	18653	0	0	0.00032413	0.0012987	0.09385	264	5	0.73509
CAPZA1	5	0.98485	0.986	1	18185	0	0	0.00033092	0.0013213	0.095122	265	4	0.79937
GID8	3	0.60529	0.62656	1	12840	1	-0.33613	0.00033881	0.0005151	0.052886	266	2	4.0477
SRSF9	5	0.92454	0.93543	1	16936	0	0	0.00034772	0.0014526	0.104167	267	4	0.54215
BET1L	5	0.96827	0.96959	1	17819	0	0	0.00035138	0.0014631	0.104167	268	4	0.7713
COIL	5	0.43481	0.58757	1	10564	1	-0.44055	0.00035322	0.0014636	0.104167	269	4	0.61598
ATP8B2	10	0.048554	0.14181	0.856712	2695	1	-1.1653	0.00035636	0.0030382	0.174569	270	6	0.64983
CFDP1	10	0.83505	0.92551	1	15278	2	-0.44516	0.00036328	0.0030798	0.176422	271	7	0.99526
EMC2	5	0.25112	0.44123	1	7737	1	-3.5349	0.00036634	0.0014757	0.104277	272	4	1.2489
EFNA2	5	0.16491	0.30961	1	5785	2	-0.38009	0.00036826	0.0014763	0.104277	273	1	7.7498
DDX17	5	0.99841	0.99864	1	18586	0	0	0.00037097	0.0014852	0.104311	274	5	0.85859
NELFA	5	0.88946	0.90019	1	16209	0	0	0.00037721	0.0014879	0.104311	275	4	1.6017
SAAL1	10	0.99785	0.99813	1	18557	0	0	0.00039136	0.0031552	0.180189	276	8	0.69602
TRAPPC2L	5	0.9996	0.99969	1	18650	0	0	0.00039821	0.0015269	0.106116	277	5	0.7196
NOMO1	5	0.9996	0.99969	1	18649	0	0	0.00039896	0.00153	0.106116	278	5	0.35687
ALG11	5	0.9996	0.99969	1	18648	0	0	0.00040122	0.0015305	0.106116	279	5	0.46885
SCAF4	5	0.99959	0.99968	1	18647	0	0	0.00040948	0.0015548	0.106605	280	5	0.33206
ZFP64	5	0.99934	0.99948	1	18630	0	0	0.00041733	0.0015601	0.106605	281	5	0.58883
XYLT2	5	0.0044747	0.012932	0.391912	627	3	-0.64755	0.00041735	0.0015601	0.106605	282	1	7.392
YIPF2	5	0.99944	0.99957	1	18633	0	0	0.00042129	0.0015716	0.106605	283	5	0.55247
LRP1B	5	0.99958	0.99968	1	18646	0	0	0.00042315	0.0015716	0.106605	284	5	0.54927
PHLPP1	5	0.99957	0.99968	1	18645	0	0	0.00042541	0.0015716	0.106605	285	5	0.41527
VKORC1L1	5	0.90714	0.91815	1	16589	0	0	0.0004382	0.0015917	0.107514	286	4	1.1591
SETD5	5	0.99956	0.99966	1	18644	0	0	0.00044062	0.0015991	0.107514	287	5	0.91371
C5orf52	5	0.99956	0.99966	1	18643	0	0	0.00044195	0.0016022	0.107514	288	5	0.6924
RNF111	5	0.56877	0.71509	1	12587	1	-0.68863	0.00045593	0.0016149	0.107519	289	4	0.65757
GDE1	5	0.19061	0.35613	1	6492	2	-0.3239	0.00046644	0.0016301	0.107519	290	2	3.7603
MRGBP	5	0.99035	0.99118	1	18313	0	0	0.00047014	0.0016307	0.107519	291	4	0.68215
SNX17	5	0.98458	0.98557	1	18180	0	0	0.00047218	0.0016307	0.107519	292	4	0.95834
KIAA0907	5	0.98625	0.98755	1	18204	0	0	0.00047501	0.0016396	0.107519	293	4	0.80225
TRAPPC3	5	0.7237	0.77933	1	13900	1	-0.15171	0.00047886	0.0016465	0.107519	294	4	1.9868
RANBP9	5	0.38843	0.55134	1	9864	2	-0.21808	0.00048232	0.001647	0.107519	295	3	0.98326
NCR1	5	0.5937	0.72477	1	12769	1	-0.50521	0.00049372	0.0016723	0.10813	296	4	2.1924
JUN	5	0.92845	0.93807	1	17016	0	0	0.00049521	0.0016728	0.10813	297	4	0.65974
TMEM41B	4	0.9995	0.99966	1	18640	0	0	0.00049678	0.0011943	0.091222	298	4	0.92254
WDR26	5	0.9995	0.99961	1	18639	0	0	0.00050385	0.0016755	0.10813	299	5	0.95638
UPF1	5	0.93083	0.93944	1	17063	0	0	0.00051156	0.0017055	0.10813	300	4	1.5347
HNRNPC	5	0.99949	0.99961	1	18638	0	0	0.00051169	0.0017055	0.10813	301	5	0.56925
METTL14	5	0.7678	0.80667	1	14380	1	-0.15895	0.00051295	0.001706	0.10813	302	3	1.0712
GATSL3	5	0.99949	0.99961	1	18636	0	0	0.00051318	0.001706	0.10813	303	5	0.51201
CNOT10	5	0.99875	0.99889	1	18604	0	0	0.00051458	0.0017145	0.10813	304	5	0.66519
CERS2	5	0.93547	0.94327	1	17162	0	0	0.00051497	0.0017145	0.10813	305	3	2.5932
ARID4B	5	0.99925	0.99936	1	18629	0	0	0.00051772	0.001715	0.10813	306	5	0.63699
RNF126	5	0.99947	0.9996	1	18635	0	0	0.00052591	0.0017292	0.108663	307	5	0.57234
SSTR5	10	0.73016	0.88968	1	13971	1	-0.34559	0.0005532	0.0049537	0.271692	308	7	1.1625
ADNP	5	0.99944	0.99957	1	18634	0	0	0.00055739	0.0017824	0.110927	309	5	1.0491
ZCCHC2	5	0.13284	0.26328	0.984954	5046	1	-0.73665	0.00056138	0.001783	0.110927	310	3	1.8102
FAM98A	5	0.86629	0.8758	1	15807	1	-0.21665	0.00058196	0.0018169	0.112669	311	4	0.61949
RHOA	5	0.9992	0.99933	1	18621	0	0	0.00058409	0.0018235	0.112705	312	5	0.77834
ATP6V1D	5	0.78507	0.81582	1	14578	1	-0.14645	0.00059179	0.0018388	0.113277	313	4	1.1065
C17orf97	5	0.99806	0.9983	1	18567	0	0	0.00061102	0.0018704	0.114474	314	5	0.4648
FBXO8	10	0.38711	0.65121	1	9850	1	-0.79555	0.00061275	0.0055085	0.272986	315	8	0.55381
QRICH2	5	0.91201	0.92272	1	16683	0	0	0.0006137	0.0018704	0.114474	316	3	2.6643
LEO1	5	0.99938	0.99951	1	18632	0	0	0.00061566	0.0018804	0.114534	317	5	0.77211
CPSF7	5	0.99938	0.99951	1	18631	0	0	0.0006242	0.0018836	0.114534	318	5	0.68241
MGA	5	0.99339	0.9939	1	18417	0	0	0.00064732	0.0019221	0.116496	319	5	0.38891
CDK17	5	0.59516	0.72521	1	12783	1	-0.37994	0.00065577	0.0019642	0.118669	320	4	1.8022
GTF3C4	5	0.53277	0.68315	1	12062	2	-0.17437	0.00066084	0.0019774	0.118733	321	3	1.1363
SHANK1	5	0.14026	0.27154	0.990477	5224	2	-0.4204	0.00066278	0.0019779	0.118733	322	2	3.9856
VPS51	5	0.9535	0.95655	1	17529	0	0	0.00067028	0.0019974	0.119521	323	3	1.4859
KCNJ12	5	0.98869	0.98953	1	18262	0	0	0.00071187	0.0021413	0.126917	324	4	2.1389
COG8	5	0.99663	0.99728	1	18512	0	0	0.00071922	0.002273	0.132701	325	5	1.4496
CCT8	5	0.48673	0.63819	1	11368	1	-1.7875	0.00072466	0.0022851	0.132701	326	4	1.2167
TARDBP	5	0.99275	0.9936	1	18392	0	0	0.00072714	0.0022857	0.132701	327	5	0.80584
ASCC3	5	0.79348	0.81813	1	14694	1	-0.74134	0.00072951	0.0022878	0.132701	328	3	2.3746
ABTB2	5	0.90127	0.91144	1	16458	0	0	0.00073444	0.0022883	0.132701	329	4	0.5483
DNAJC25	5	0.98948	0.99034	1	18286	0	0	0.00074537	0.0022962	0.132749	330	4	0.52127
CTU1	5	0.99472	0.99534	1	18452	0	0	0.00075299	0.0023068	0.13295	331	5	0.56224
BRD2	10	0.6808	0.8551	1	13505	1	-0.2263	0.00075334	0.0058716	0.273265	332	9	0.50649
AIMP1	5	0.44411	0.59534	1	10711	1	-0.2783	0.00076142	0.0048931	0.271692	333	4	0.6128
PLEKHA8	5	0.99924	0.99935	1	18627	0	0	0.00076352	0.0048999	0.271692	334	5	0.44165
KRTAP5-3	5	0.99923	0.99935	1	18626	0	0	0.0007681	0.0049078	0.271692	335	5	0.35643
MSMO1	5	0.99923	0.99935	1	18625	0	0	0.00076889	0.0049078	0.271692	336	5	0.42824
FRYL	4	0.99454	0.99512	1	18446	0	0	0.00077225	0.0036052	0.205266	337	4	0.53184
ZNF581	5	0.99922	0.99934	1	18624	0	0	0.00077541	0.0049157	0.271692	338	5	0.40982
YWHAZ	5	0.99921	0.99934	1	18623	0	0	0.00078535	0.0049357	0.271692	339	5	0.48229
GID4	5	0.99921	0.99934	1	18622	0	0	0.00078583	0.0049357	0.271692	340	5	0.62946
R3HDM4	10	0.037509	0.11495	0.808658	2234	1	-1.3489	0.0007928	0.0059775	0.273265	341	9	0.3058
COG4	5	0.99856	0.99873	1	18594	0	0	0.00079407	0.0049595	0.271692	342	5	1.1239
AANAT	5	0.84585	0.85759	1	15454	1	-0.21636	0.00081002	0.005059	0.271692	343	3	2.6594
SREK1	5	0.99122	0.99186	1	18338	0	0	0.00081316	0.005059	0.271692	344	4	0.55851
STT3A	5	0.80002	0.82411	1	14770	1	-0.22504	0.00082006	0.005068	0.271692	345	3	1.4744
GNPAT	5	0.98958	0.99055	1	18293	0	0	0.00082008	0.005068	0.271692	346	4	1.0512
ETNK1	5	0.21466	0.39779	1	7077	1	-0.8444	0.00082914	0.0050801	0.271692	347	4	0.75915
SCAI	5	0.94871	0.95227	1	17427	0	0	0.00083451	0.0051023	0.271692	348	4	0.91963
ASB14	5	0.93783	0.94383	1	17212	0	0	0.0008393	0.0051175	0.271692	349	4	0.52712
PI4KA	5	0.27743	0.46093	1	8139	1	-0.54705	0.00084469	0.0051244	0.271692	350	3	2.6722
OTUD6B	5	0.9972	0.99767	1	18537	0	0	0.00085782	0.0051355	0.271692	351	5	0.6158
EGLN2	10	0.99267	0.99464	1	18387	0	0	0.00086237	0.0061014	0.27674	352	8	0.378
PRKCD	5	0.99913	0.99925	1	18619	0	0	0.00087017	0.0051802	0.271692	353	5	1.5061
CLEC16A	5	0.64537	0.7428	1	13177	1	-1.1713	0.00087028	0.0051802	0.271692	354	4	1.0558
USP15	5	0.99912	0.99925	1	18618	0	0	0.00087578	0.0051808	0.271692	355	5	0.5256
DOCK4	5	0.97243	0.97372	1	17913	0	0	0.00087623	0.0051808	0.271692	356	4	0.78684
LIMS2	5	0.90143	0.91144	1	16462	0	0	0.00090558	0.0052277	0.271692	357	4	0.75845
TRMT2A	5	0.99909	0.99922	1	18616	0	0	0.00090572	0.0052277	0.271692	358	5	0.37482
LMCD1	5	0.95336	0.95614	1	17526	0	0	0.00090817	0.0052482	0.271692	359	4	2.0625
ELOVL5	5	0.93906	0.94569	1	17232	0	0	0.00090937	0.0052482	0.271692	360	4	0.62678
REL	5	0.84881	0.86027	1	15493	1	-0.22071	0.00091142	0.0052488	0.271692	361	4	0.66489
EIF2AK4	5	0.99909	0.9992	1	18615	0	0	0.00091442	0.005263	0.271692	362	5	0.45066
GNG3	5	0.65371	0.74825	1	13249	1	-0.20092	0.00091935	0.0052635	0.271692	363	4	0.55633
PRPF4B	5	0.93379	0.94169	1	17123	0	0	0.00092584	0.0052793	0.271762	364	4	0.96306
ELOF1	5	0.99115	0.99179	1	18335	0	0	0.00093434	0.0053057	0.272372	365	4	1.4145
PPP5D1	4	0.80075	0.81177	1	14782	1	-0.11739	0.00094254	0.0039124	0.222084	366	3	2.7493
ZXDC	5	0.94547	0.94963	1	17350	0	0	0.00094523	0.0053267	0.272396	367	4	0.48862
FAF2	5	0.66845	0.7555	1	13387	1	-0.39512	0.00095428	0.0053368	0.272396	368	3	1.6326
DPM3	5	0.37617	0.54214	1	9669	1	-0.41149	0.00096371	0.0053821	0.272396	369	2	2.507
DCTN4	5	0.981	0.98256	1	18098	0	0	0.00097441	0.0054026	0.272396	370	4	0.81086
PER3	5	0.9946	0.99505	1	18447	0	0	0.00098366	0.0054032	0.272396	371	5	0.36009
DDX26B	5	0.999	0.99912	1	18613	0	0	0.00099599	0.0054216	0.272396	372	5	0.83761
SLC12A7	5	0.59306	0.72477	1	12763	1	-0.32685	0.00099816	0.0054216	0.272396	373	3	0.57442
RPRD1A	5	0.62145	0.73563	1	12975	1	-1.4596	0.0010063	0.0054221	0.272396	374	4	2.1572
FBLN5	5	0.63877	0.74145	1	13107	1	-0.28739	0.0010193	0.0054485	0.272986	375	2	2.37
FERMT3	10	0.26302	0.52223	1	7916	2	-0.36114	0.0010308	0.0064502	0.279447	376	5	1.8367
SLC48A1	10	0.34762	0.60588	1	9212	3	-0.45265	0.0010365	0.0064608	0.279447	377	7	0.73429
CAPN1	5	0.16517	0.31003	1	5793	2	-0.24087	0.0010554	0.005546	0.272986	378	3	2.7461
PQLC2	5	0.99234	0.99312	1	18375	0	0	0.001063	0.0055465	0.272986	379	4	0.65036
BCL7A	5	0.99662	0.99728	1	18511	0	0	0.0010653	0.0055565	0.272986	380	5	0.48782
OGFOD3	4	0.89244	0.90063	1	16281	0	0	0.0010799	0.0041564	0.235223	381	3	2.6897
ATG16L1	5	0.99659	0.99728	1	18510	0	0	0.0010954	0.0056203	0.272986	382	5	0.48091
MBD3	5	0.99889	0.999	1	18611	0	0	0.001107	0.0056329	0.272986	383	5	0.49514
NLRP7	10	0.30878	0.56937	1	8595	1	-1.2898	0.0011184	0.0066252	0.283731	384	8	0.42953
POMZP3	5	0.8586	0.8686	1	15655	1	-0.167	0.0011207	0.0056334	0.272986	385	2	3.7954
2022-03-06	5	0.99875	0.99889	1	18605	0	0	0.0011276	0.0056334	0.272986	386	5	0.90266
TRAF3	5	0.99887	0.999	1	18610	0	0	0.0011301	0.0056334	0.272986	387	5	0.44544
FOXH1	5	0.49908	0.64662	1	11542	1	-0.68976	0.0011396	0.0056566	0.272986	388	4	0.35685
TOR4A	5	0.99886	0.99898	1	18609	0	0	0.0011436	0.0056566	0.272986	389	5	0.51493
EIF3K	5	0.9914	0.99208	1	18344	0	0	0.0011438	0.0056566	0.272986	390	4	0.79423
ZNHIT2	5	0.90606	0.9152	1	16573	0	0	0.0011493	0.0056566	0.272986	391	3	1.0305
ZNF608	10	0.69865	0.868	1	13672	1	-0.37122	0.0011564	0.0067132	0.283731	392	7	0.83367
RNF145	10	0.95664	0.97193	1	17591	1	-0.17993	0.0011572	0.0067132	0.283731	393	8	0.48132
DNAJB9	5	0.75214	0.7989	1	14212	1	-0.42855	0.0011671	0.0056571	0.272986	394	4	0.35263
ZCCHC8	5	0.99883	0.99896	1	18608	0	0	0.0011733	0.0056803	0.272986	395	5	0.53491
ZNF735	5	0.46393	0.61379	1	10992	1	-0.27119	0.001178	0.0056809	0.272986	396	3	2.7186
ACTR6	5	0.88559	0.89454	1	16140	0	0	0.001212	0.0057309	0.273265	397	3	2.3176
INTS9	5	0.99878	0.99891	1	18607	0	0	0.0012247	0.0057636	0.273265	398	5	0.72478
CACFD1	5	0.96968	0.97151	1	17848	0	0	0.0012268	0.0057768	0.273265	399	4	0.45743
YIPF6	5	0.99619	0.99694	1	18491	0	0	0.0012301	0.0057768	0.273265	400	5	0.56921
RBM44	5	0.99877	0.99891	1	18606	0	0	0.0012315	0.0057773	0.273265	401	5	0.34434
ZNF862	5	0.22386	0.41475	1	7287	3	-0.29056	0.0012516	0.0058036	0.273265	402	2	4.3806
BRE	5	0.97256	0.974	1	17917	0	0	0.0012518	0.0058036	0.273265	403	4	0.63302
APIP	5	0.71653	0.77708	1	13836	1	-0.21389	0.0012611	0.0058115	0.273265	404	3	2.0375
PPP1R26	5	0.99873	0.99887	1	18603	0	0	0.0012693	0.00584	0.273265	405	5	0.37944
STX5	5	0.75731	0.80395	1	14266	1	-0.19102	0.0012902	0.005899	0.273265	406	3	1.585
TMEM187	5	0.97526	0.97629	1	17973	0	0	0.0012909	0.005899	0.273265	407	4	0.65387
RPRD1B	5	0.98436	0.98539	1	18172	0	0	0.0012995	0.0059422	0.273265	408	4	0.96697
RASAL1	5	0.96126	0.9627	1	17693	0	0	0.0013007	0.0059422	0.273265	409	4	1.9609
SKOR2	5	0.9987	0.99879	1	18602	0	0	0.0013047	0.0059422	0.273265	410	5	0.25491
KMT2A	5	0.99869	0.99879	1	18601	0	0	0.0013113	0.0059428	0.273265	411	5	0.83105
RAB1B	5	0.88266	0.8919	1	16092	0	0	0.00132	0.0059543	0.273265	412	3	1.0196
MBTPS1	5	0.89254	0.90227	1	16283	0	0	0.0013369	0.0059754	0.273265	413	4	0.96155
ST6GALNAC5	5	0.99865	0.99877	1	18599	0	0	0.0013456	0.005976	0.273265	414	5	0.48323
SRP54	5	0.95874	0.9605	1	17637	0	0	0.0013627	0.0061077	0.27674	415	3	0.75771
TLCD1	4	0.99863	0.9989	1	18597	0	0	0.0013743	0.0046196	0.260652	416	4	0.57748
PEX14	5	0.9901	0.99091	1	18309	0	0	0.0013779	0.0061272	0.27674	417	4	0.92818
CHORDC1	5	0.9141	0.92574	1	16733	0	0	0.0013798	0.0061272	0.27674	418	4	0.76834
ALDH4A1	5	0.99862	0.99874	1	18596	0	0	0.0013848	0.0061272	0.27674	419	5	0.40872
MTF1	5	0.74904	0.79799	1	14178	1	-0.14601	0.001396	0.0061498	0.277097	420	4	0.59189
DNAJC24	5	0.90358	0.91259	1	16520	0	0	0.0014101	0.0061783	0.277712	421	4	0.84959
COMMD10	5	0.98132	0.98276	1	18105	0	0	0.0014181	0.0061931	0.277712	422	4	0.5563
SLC46A2	5	0.3756	0.54213	1	9662	2	-0.41983	0.0014479	0.0062331	0.278154	423	2	4.056
RFT1	5	0.10259	0.21309	0.962822	4193	1	-0.80228	0.0014571	0.0062473	0.278154	424	3	1.296
ANKRD13D	5	0.99854	0.99871	1	18593	0	0	0.0014599	0.0062473	0.278154	425	5	0.53918
SH2D3C	8	0.36451	0.60408	1	9479	1	-0.24774	0.0014668	0.0096583	0.364398	426	5	1.5273
EXOC2	5	0.89159	0.90146	1	16257	0	0	0.0014726	0.0062895	0.278555	427	4	0.71265
ZMYM2	5	0.99851	0.99871	1	18592	0	0	0.0014876	0.0063164	0.278555	428	5	0.73409
OSBPL1A	5	0.61674	0.73472	1	12934	1	-0.39264	0.0014969	0.0063406	0.278555	429	3	2.4664
GLG1	5	0.30535	0.47859	1	8536	1	-0.50171	0.0015051	0.0063411	0.278555	430	4	0.70035
COMMD8	5	0.51197	0.66227	1	11713	1	-0.95474	0.0015115	0.0063411	0.278555	431	3	1.4279
ABCD3	5	0.93678	0.94356	1	17193	0	0	0.001517	0.0063596	0.278555	432	4	0.59148
METTL16	5	0.95685	0.95888	1	17596	0	0	0.0015186	0.0063601	0.278555	433	4	1.574
OR10K2	5	0.81928	0.83722	1	15034	1	-0.22576	0.001546	0.0064086	0.279447	434	3	2.6566
RBM7	5	0.99792	0.99821	1	18561	0	0	0.001556	0.0064692	0.279447	435	5	0.64147
PPP4R1	5	0.99844	0.9987	1	18590	0	0	0.0015594	0.0064692	0.279447	436	5	1.5555
UBE2C	5	0.99843	0.9987	1	18589	0	0	0.0015663	0.0064697	0.279447	437	5	0.68044
KDELC2	5	0.99841	0.99864	1	18588	0	0	0.0015877	0.0066636	0.283731	438	5	0.28488
NGFR	5	0.99841	0.99864	1	18587	0	0	0.0015883	0.0066636	0.283731	439	5	0.33402
LY6G6D	5	0.069138	0.15464	0.879374	3327	1	-0.90411	0.001595	0.0066642	0.283731	440	4	2.1565
ATP6V1B2	5	0.9984	0.99863	1	18585	0	0	0.0015954	0.0066642	0.283731	441	5	0.9428
ZFHX4	5	0.9984	0.99863	1	18584	0	0	0.0015985	0.0066773	0.283731	442	5	0.40298
RNF214	5	0.98851	0.98953	1	18255	0	0	0.0016267	0.0067458	0.283731	443	4	0.62561
KTI12	5	0.99188	0.99268	1	18362	0	0	0.0016337	0.0067601	0.283731	444	4	0.78669
RNF150	5	0.92576	0.93602	1	16961	0	0	0.001644	0.0067848	0.283731	445	3	2.558
JTB	5	0.99657	0.99728	1	18508	0	0	0.0016531	0.0067964	0.283731	446	5	0.73378
HTR6	5	0.65633	0.74869	1	13272	1	-0.35876	0.0016626	0.0068107	0.283731	447	4	1.6785
CMPK1	5	0.99382	0.99435	1	18426	0	0	0.0016659	0.0068112	0.283731	448	5	1.4244
ZNF266	5	0.99833	0.99853	1	18582	0	0	0.0016668	0.0068112	0.283731	449	5	0.27474
TNKS	5	0.99833	0.99853	1	18581	0	0	0.0016695	0.0068112	0.283731	450	5	0.37895
SOAT1	5	0.99695	0.99741	1	18524	0	0	0.0016845	0.0068317	0.283731	451	5	0.40564
NSUN2	5	0.55731	0.70555	1	12443	2	-0.17832	0.0016929	0.0068855	0.283731	452	3	0.84489
PURG	5	0.58262	0.72202	1	12662	1	-0.19098	0.0016931	0.006886	0.283731	453	4	1.9789
ZNF367	5	0.997	0.99745	1	18529	0	0	0.0016938	0.006886	0.283731	454	5	0.32549
CIC	5	0.99831	0.99847	1	18580	0	0	0.0016943	0.006886	0.283731	455	5	1.4556
HINT2	5	0.99829	0.99844	1	18578	0	0	0.0017129	0.0069672	0.285271	456	5	0.29432
ARHGAP17	5	0.61308	0.73381	1	12904	1	-0.34785	0.0017324	0.0069793	0.285271	457	4	0.54195
ALG2	5	0.96962	0.97151	1	17847	0	0	0.0017408	0.0069993	0.285271	458	4	0.77594
SP4	5	0.99709	0.99756	1	18532	0	0	0.001741	0.0069993	0.285271	459	5	0.47486
PRICKLE4	5	0.22992	0.42184	1	7418	2	-0.40306	0.0017421	0.0069993	0.285271	460	2	3.6958
PDCD10	5	0.92541	0.93602	1	16954	0	0	0.0017564	0.0071237	0.288026	461	4	0.69729
ZKSCAN1	5	0.99822	0.99842	1	18577	0	0	0.0017776	0.0071558	0.288026	462	5	1.6386
SPIRE1	5	0.98914	0.99015	1	18274	0	0	0.0017826	0.0071685	0.288026	463	4	0.51995
CYB561D2	5	0.42878	0.58436	1	10477	1	-0.40037	0.0017839	0.0071685	0.288026	464	4	0.94479
ZNF786	5	0.03665	0.087237	0.748606	2192	3	-0.33086	0.0017912	0.0071685	0.288026	465	2	3.6117
GATAD2A	10	0.87356	0.94155	1	15926	2	-0.14337	0.0017975	0.013192	0.481313	466	8	0.40912
LIG4	10	0.30977	0.56937	1	8607	1	-1.0635	0.0018072	0.013193	0.481313	467	8	0.35827
FABP5	5	0.99818	0.9984	1	18576	0	0	0.0018205	0.0071795	0.288026	468	5	0.70369
KIAA1804	5	0.98427	0.9853	1	18169	0	0	0.0018217	0.0071895	0.288026	469	4	0.54837
CDC23	5	0.97939	0.98079	1	18061	0	0	0.0018231	0.0071895	0.288026	470	4	1.0096
C3AR1	5	0.10412	0.21525	0.968741	4231	2	-0.28123	0.0018402	0.0073097	0.288713	471	3	2.4501
RPL11	5	0.99816	0.99836	1	18574	0	0	0.001842	0.0073097	0.288713	472	5	0.96504
TGIF2-C20orf24	3	0.98975	0.99122	1	18297	0	0	0.0018453	0.0082355	0.311971	473	3	0.91527
SHANK2	5	0.99179	0.99258	1	18358	0	0	0.0018466	0.0073097	0.288713	474	4	0.47888
HEATR6	5	0.82016	0.83767	1	15047	1	-0.2099	0.0018477	0.0073102	0.288713	475	3	1.4641
PRY	5	0.98672	0.98763	1	18218	0	0	0.0018667	0.0073445	0.288713	476	4	0.4982
MTA2	5	0.99813	0.99835	1	18573	0	0	0.0018677	0.0073445	0.288713	477	5	0.48546
RNF26	5	0.99813	0.99835	1	18572	0	0	0.0018709	0.0073445	0.288713	478	5	0.53594
GTF2IRD2B	2	0.83823	0.84372	1	15336	0	0	0.0018751	0.0051729	0.271692	479	1	6.7108
DSCR3	5	0.99812	0.99835	1	18571	0	0	0.0018799	0.007345	0.288713	480	5	0.35567
TCF7L2	5	0.99812	0.99835	1	18570	0	0	0.0018819	0.007345	0.288713	481	5	0.4243
SCYL1	5	0.99258	0.99341	1	18382	0	0	0.0018892	0.0073624	0.288793	482	4	0.72129
RAB33B	5	0.99809	0.99831	1	18569	0	0	0.0019112	0.007434	0.290996	483	5	0.40503
RNASEK	2	0.99807	0.99893	1	18568	0	0	0.0019262	0.0052019	0.271692	484	2	1.424
PTBP3	5	0.76168	0.80534	1	14316	1	-0.12836	0.0019577	0.0075616	0.293408	485	4	0.57397
SH3GLB1	5	0.9919	0.99273	1	18364	0	0	0.0019586	0.0075621	0.293408	486	4	0.38592
FOXK2	5	0.99804	0.99829	1	18566	0	0	0.0019613	0.0075621	0.293408	487	5	0.32953
CPLX1	5	0.9901	0.99091	1	18310	0	0	0.0019642	0.0075879	0.293408	488	4	0.49605
SSR4	5	0.99801	0.99828	1	18564	0	0	0.0019777	0.0076053	0.293408	489	5	0.66518
SLC9A1	5	0.99802	0.99829	1	18565	0	0	0.0019822	0.0076053	0.293408	490	5	0.47397
VAPA	5	0.097581	0.20503	0.956611	4073	2	-1.0148	0.0019924	0.0076206	0.293408	491	3	1.009
CPSF4	5	0.93449	0.94273	1	17138	0	0	0.0019966	0.0076206	0.293408	492	3	1.7449
ABCC8	5	0.58673	0.72292	1	12706	1	-0.35347	0.0020101	0.0076691	0.294671	493	3	1.9666
KCNH2	10	0.56946	0.78911	1	12590	3	-0.21681	0.002011	0.013653	0.496189	494	7	0.44942
FAM46D	5	0.75212	0.7989	1	14211	1	-0.19721	0.0020363	0.0077081	0.294983	495	3	2.4713
PAPOLG	5	0.99183	0.99258	1	18359	0	0	0.0020504	0.0077086	0.294983	496	4	0.48057
TSPYL2	5	0.3012	0.47475	1	8477	1	-0.41724	0.0020722	0.0077507	0.295577	497	4	0.58471
IL27RA	5	0.99791	0.99821	1	18560	0	0	0.0020853	0.0077713	0.295577	498	5	0.54568
ARMCX3	5	0.98411	0.98512	1	18163	0	0	0.0020854	0.0077713	0.295577	499	4	2.3389
CBFA2T3	10	0.42058	0.68381	1	10367	3	-0.9452	0.0021065	0.013822	0.501361	500	5	1.4863
CYP21A2	5	0.9528	0.95592	1	17514	0	0	0.0021225	0.0078466	0.29784	501	4	0.69139
ZPLD1	10	0.36937	0.63543	1	9558	2	-0.44611	0.002129	0.013851	0.501361	502	8	0.42267
HOXA3	10	0.82601	0.92149	1	15145	2	-0.16181	0.0021375	0.013876	0.501361	503	6	0.6304
CBX5	5	0.99786	0.99817	1	18558	0	0	0.0021394	0.010369	0.390361	504	5	0.35631
HS3ST6	5	0.77538	0.80853	1	14463	1	-0.2646	0.0021469	0.010403	0.390361	505	4	0.52094
PIP5K1A	5	0.62803	0.73744	1	13026	1	-0.34849	0.0021623	0.010417	0.390361	506	4	0.48709
RPIA	5	0.99783	0.99817	1	18555	0	0	0.0021657	0.010432	0.390361	507	5	0.3
PDCL	5	0.99782	0.99817	1	18554	0	0	0.0021817	0.01045	0.390361	508	5	0.57665
ATP6V1F	5	0.86074	0.86992	1	15693	1	-0.16583	0.0021953	0.012923	0.478558	509	3	1.0296
CDK6	10	0.26732	0.52448	1	7978	3	-0.32591	0.0022077	0.014121	0.509236	510	5	1.7018
OR52R1	5	0.99779	0.99815	1	18553	0	0	0.0022085	0.01294	0.478558	511	5	0.37158
ZNF524	5	0.99778	0.99815	1	18551	0	0	0.0022196	0.012961	0.478558	512	5	0.4049
ZNF169	5	0.99553	0.99611	1	18474	0	0	0.0022324	0.012993	0.478558	513	5	1.5636
LRRC34	5	0.47728	0.62706	1	11214	2	-0.17881	0.0022435	0.013011	0.478558	514	2	2.3466
ERMP1	5	0.94772	0.95179	1	17393	0	0	0.0022579	0.013066	0.478558	515	4	0.72383
OXCT2	5	0.96759	0.96878	1	17802	0	0	0.0022701	0.013066	0.478558	516	4	0.36365
CD63	5	0.32221	0.49482	1	8801	1	-0.68608	0.0022787	0.013066	0.478558	517	4	1.9389
RNF19B	5	0.8969	0.90797	1	16374	0	0	0.0023081	0.015674	0.512953	518	4	0.46173
UNC45B	5	0.98664	0.98763	1	18215	0	0	0.0023313	0.015767	0.512953	519	4	1.958
CHTOP	5	0.91023	0.92029	1	16652	0	0	0.0023394	0.015767	0.512953	520	4	0.8024
SRPK1	5	0.99766	0.99804	1	18549	0	0	0.0023432	0.015768	0.512953	521	5	0.43632
TMEM189-UBE2V1	2	0.99764	0.99878	1	18548	0	0	0.0023574	0.0083994	0.317539	522	2	1.411
UNCX	5	0.42912	0.58436	1	10484	2	-0.2054	0.0023795	0.0158	0.512953	523	3	1.6738
HGC6.3	5	0.99762	0.99802	1	18547	0	0	0.0023817	0.0158	0.512953	524	5	0.37851
DENND6A	5	0.53967	0.68924	1	12175	1	-0.27331	0.002386	0.015801	0.512953	525	3	0.63689
HNRNPL	10	0.41534	0.67898	1	10292	2	-0.39286	0.0024031	0.014613	0.512953	526	4	0.48561
CLIC1	5	0.82996	0.84173	1	15211	1	-0.14724	0.0024133	0.015846	0.512953	527	4	0.71931
NCAPH	5	0.99757	0.99792	1	18546	0	0	0.0024315	0.015931	0.512953	528	5	0.85717
CCDC53	5	0.98653	0.98755	1	18212	0	0	0.0024578	0.015954	0.512953	529	4	0.68127
CYB5A	5	0.99754	0.99792	1	18545	0	0	0.0024591	0.015954	0.512953	530	5	0.28093
KLHL2	5	0.9461	0.95013	1	17362	0	0	0.0024772	0.016003	0.512953	531	4	0.57791
GLI1	5	0.52907	0.67871	1	12005	1	-0.45846	0.0024775	0.016003	0.512953	532	3	2.7108
EMX1	10	0.37236	0.6369	1	9600	4	-0.19506	0.0024956	0.014776	0.512953	533	6	0.62547
SLC25A37	5	0.99749	0.99791	1	18544	0	0	0.0025056	0.016041	0.512953	534	5	0.46069
ERV3-1	5	0.98702	0.98804	1	18221	0	0	0.0025109	0.016041	0.512953	535	4	0.27558
PHC3	5	0.99748	0.99791	1	18543	0	0	0.0025158	0.016041	0.512953	536	5	0.28773
IDH3G	5	0.94859	0.95227	1	17420	0	0	0.0025231	0.016041	0.512953	537	3	0.71397
YBX2	5	0.22989	0.42184	1	7417	2	-0.2811	0.0025265	0.016041	0.512953	538	2	3.7914
XPOT	5	0.55065	0.70105	1	12342	1	-0.21359	0.0025341	0.016061	0.512953	539	3	2.4492
MTMR4	10	0.9896	0.99155	1	18295	0	0	0.0025619	0.014907	0.512953	540	6	0.57114
PPP1R21	5	0.97643	0.97785	1	17999	0	0	0.002568	0.016135	0.512953	541	4	0.70576
RHBDD3	5	0.96445	0.96601	1	17760	0	0	0.0025696	0.016135	0.512953	542	4	0.7673
AKAP1	5	0.99743	0.99786	1	18542	0	0	0.0025719	0.016135	0.512953	543	5	0.37335
RBM45	5	0.97324	0.97518	1	17931	0	0	0.002593	0.016196	0.512953	544	4	0.41352
MAST2	5	0.99076	0.99141	1	18327	0	0	0.0025981	0.016196	0.512953	545	4	0.68674
MYEF2	5	0.20497	0.3845	1	6822	3	-0.1639	0.0026245	0.016196	0.512953	546	2	3.6346
THEG5	5	0.92003	0.93089	1	16859	0	0	0.002647	0.016218	0.512953	547	4	0.54919
CST7	5	0.91711	0.92804	1	16804	0	0	0.0026636	0.016257	0.512953	548	4	0.4267
JRK	10	0.64402	0.83472	1	13163	3	-0.1975	0.0026688	0.015124	0.512953	549	6	1.0219
PTGER1	5	0.54054	0.69017	1	12188	1	-0.41605	0.0026709	0.016257	0.512953	550	4	0.61918
RPE	5	0.91181	0.92239	1	16680	0	0	0.0026726	0.016257	0.512953	551	4	1.165
NEK9	5	0.5381	0.68818	1	12144	2	-0.15716	0.0026735	0.016257	0.512953	552	3	2.5591
DUSP9	10	0.90323	0.95822	1	16507	1	-0.23638	0.0027004	0.015201	0.512953	553	6	0.49123
DPAGT1	5	0.98992	0.99078	1	18304	0	0	0.0027036	0.016403	0.512953	554	4	0.59412
OR9K2	5	0.31589	0.48922	1	8718	1	-0.31096	0.0027068	0.016403	0.512953	555	3	1.4144
NUDT18	5	0.99728	0.99773	1	18539	0	0	0.0027153	0.016403	0.512953	556	5	0.56724
ZNF774	5	0.99728	0.99773	1	18538	0	0	0.0027188	0.016403	0.512953	557	5	0.23332
SHISA6	5	0.93285	0.94056	1	17103	0	0	0.0027225	0.016403	0.512953	558	3	2.5037
RDH8	5	0.47803	0.62766	1	11226	1	-0.32353	0.002734	0.016511	0.512953	559	3	0.80315
GTF3C6	5	0.9409	0.9472	1	17270	0	0	0.0027408	0.016512	0.512953	560	4	0.84061
HLA-G	5	0.90735	0.91815	1	16594	0	0	0.0027715	0.016618	0.512953	561	2	3.5038
ERLIN1	5	0.19635	0.36907	1	6618	3	-0.16341	0.0028205	0.016653	0.512953	562	2	3.6043
SNX14	5	0.99716	0.99761	1	18536	0	0	0.0028374	0.016672	0.512953	563	5	0.71874
MYH15	5	0.99716	0.99761	1	18535	0	0	0.0028406	0.016672	0.512953	564	5	0.39092
APEX1	5	0.97134	0.97328	1	17889	0	0	0.0028709	0.01672	0.512953	565	4	0.49137
AGA	5	0.99712	0.99756	1	18534	0	0	0.0028786	0.016759	0.512953	566	5	0.21965
RGMA	10	0.75004	0.89669	1	14192	1	-0.88884	0.002885	0.015548	0.512953	567	8	0.55564
SHPRH	5	0.86261	0.87173	1	15735	1	-0.2409	0.0028979	0.016924	0.512953	568	3	0.85371
CLDN19	5	0.97172	0.97372	1	17896	0	0	0.0029103	0.016945	0.512953	569	2	3.3347
KLF1	5	0.99708	0.99756	1	18531	0	0	0.0029208	0.016945	0.512953	570	5	0.28118
APLN	5	0.77331	0.80714	1	14432	1	-0.28191	0.002933	0.016946	0.512953	571	3	2.6852
TMPRSS9	5	0.94096	0.9472	1	17272	0	0	0.0029365	0.016946	0.512953	572	4	0.4352
ATP13A1	5	0.99164	0.99241	1	18356	0	0	0.0029386	0.016946	0.512953	573	4	0.57964
RPL10	5	0.99705	0.99756	1	18530	0	0	0.0029525	0.016968	0.512953	574	5	1.265
FAM24B	5	0.27387	0.45961	1	8080	1	-0.59755	0.0029681	0.017036	0.512953	575	4	0.73086
TRPM1	5	0.85286	0.86398	1	15561	1	-0.27789	0.0029948	0.017076	0.512953	576	4	0.59566
SLFNL1	5	0.99699	0.99745	1	18528	0	0	0.0030132	0.017155	0.512953	577	5	0.5177
CLDN20	5	0.76345	0.80577	1	14334	1	-0.15406	0.0030165	0.017155	0.512953	578	3	2.9137
CHD4	5	0.99698	0.99743	1	18527	0	0	0.0030231	0.017173	0.512953	579	5	0.60711
LRSAM1	5	0.99697	0.99743	1	18526	0	0	0.0030269	0.017174	0.512953	580	5	1.3563
KIAA1462	5	0.56418	0.71282	1	12548	2	-0.19961	0.0030307	0.017174	0.512953	581	3	0.58798
PURB	5	0.99696	0.99743	1	18525	0	0	0.0030378	0.0172	0.512953	582	5	0.53552
KRTAP12-1	4	0.72882	0.74856	1	13952	1	-0.32685	0.0030412	0.013062	0.478558	583	3	2.5324
EVC	5	0.99695	0.99741	1	18523	0	0	0.0030502	0.01728	0.512953	584	5	0.61678
TMEM41A	5	0.99692	0.99741	1	18522	0	0	0.003076	0.017281	0.512953	585	5	0.44871
TSPYL6	5	0.99692	0.99741	1	18521	0	0	0.0030765	0.017281	0.512953	586	5	0.78446
H2AFX	5	0.99692	0.99741	1	18520	0	0	0.0030799	0.017281	0.512953	587	5	0.30358
PRR14L	5	0.050535	0.12151	0.820403	2781	2	-1.4311	0.00309	0.017281	0.512953	588	1	6.6008
C17orf82	5	0.87438	0.88502	1	15940	1	-0.15474	0.0030904	0.017281	0.512953	589	4	0.65608
RPL3	5	0.82245	0.83767	1	15083	1	-0.32896	0.0030967	0.017281	0.512953	590	4	1.0864
RNF146	5	0.98843	0.98946	1	18253	0	0	0.0031061	0.017301	0.512953	591	4	0.59196
MEGF11	5	0.078225	0.16841	0.887821	3578	3	-0.95571	0.0031076	0.017301	0.512953	592	2	1.185
CARD8	10	0.7746	0.90419	1	14450	2	-0.236	0.0031124	0.016059	0.512953	593	7	0.41744
HMGN1	5	0.99688	0.99741	1	18519	0	0	0.0031219	0.017301	0.512953	594	5	0.36278
NTSR1	5	0.92485	0.93602	1	16941	0	0	0.0031458	0.017347	0.512953	595	4	0.69968
HNRNPM	10	0.983	0.98551	1	18143	1	-0.13382	0.0031628	0.016593	0.512953	596	6	0.53654
CHCHD1	5	0.0090277	0.022415	0.469664	900	1	-2.3844	0.0031635	0.017367	0.512953	597	1	6.8476
KY	5	0.90568	0.91484	1	16566	0	0	0.0031635	0.017367	0.512953	598	3	0.77941
CRYGD	5	0.11098	0.22614	0.969464	4428	2	-0.64603	0.0031661	0.017368	0.512953	599	3	0.81234
ACSL1	5	0.99679	0.99738	1	18518	0	0	0.0032055	0.017393	0.512953	600	5	0.72545
MAPK8IP2	5	0.99678	0.99738	1	18517	0	0	0.0032169	0.017394	0.512953	601	5	0.34877
CALCB	3	0.61641	0.63315	1	12929	1	-0.22082	0.0032283	0.011222	0.418366	602	2	1.3369
CABLES2	5	0.88181	0.89145	1	16070	0	0	0.0032429	0.017434	0.512953	603	3	2.4075
ZNRD1	5	0.99562	0.99623	1	18479	0	0	0.0032865	0.017567	0.512953	604	5	1.3869
ATP2A2	5	0.73675	0.78518	1	14032	1	-0.21481	0.003287	0.017567	0.512953	605	3	1.4679
OFD1	5	0.90863	0.91888	1	16625	0	0	0.0032961	0.017567	0.512953	606	3	0.8866
ASXL3	4	0.47493	0.60386	1	11171	1	-0.41632	0.0033156	0.013434	0.489188	607	3	3.102
ARHGAP12	5	0.98957	0.99054	1	18292	0	0	0.0033211	0.017587	0.512953	608	4	0.40397
FASTKD3	5	0.99668	0.9973	1	18515	0	0	0.0033238	0.017587	0.512953	609	5	0.28496
ELP5	5	0.68012	0.76095	1	13494	1	-1.0669	0.0033283	0.017587	0.512953	610	3	1.52
TAAR5	5	0.90033	0.9103	1	16442	0	0	0.0033349	0.017587	0.512953	611	4	1.9336
PPP1R9B	5	0.5248	0.6765	1	11932	2	-0.12667	0.0033349	0.017587	0.512953	612	2	3.52
CWC27	5	0.99666	0.9973	1	18514	0	0	0.0033351	0.017587	0.512953	613	5	0.33853
OR2C3	5	0.30645	0.47945	1	8554	1	-0.96626	0.0033559	0.017619	0.512953	614	4	1.9589
SERP1	5	0.99664	0.99728	1	18513	0	0	0.0033634	0.017642	0.512953	615	5	0.21127
ANO2	5	0.21733	0.40321	1	7133	2	-0.64738	0.0033768	0.017642	0.512953	616	2	3.9864
U2SURP	5	0.83979	0.85303	1	15358	1	-0.29799	0.003378	0.017642	0.512953	617	4	2.052
SLC7A2	5	0.90986	0.91954	1	16646	0	0	0.0033933	0.017642	0.512953	618	4	0.4933
ZXDA	5	0.55624	0.70555	1	12420	2	-0.14275	0.0034084	0.017642	0.512953	619	1	6.5731
SEC23A	5	0.99659	0.99728	1	18509	0	0	0.0034116	0.017671	0.512953	620	5	0.35566
AACS	5	0.98932	0.99015	1	18278	0	0	0.0034617	0.017825	0.512953	621	4	0.70136
KIAA2013	5	0.93535	0.94327	1	17159	0	0	0.0034631	0.017825	0.512953	622	4	1.2008
GGPS1	5	0.99653	0.99723	1	18507	0	0	0.0034652	0.017825	0.512953	623	5	1.0632
APOA1	5	0.99652	0.99723	1	18506	0	0	0.0034795	0.017853	0.512953	624	5	0.30381
STK31	5	0.47651	0.62652	1	11194	1	-0.47611	0.0034931	0.017877	0.512953	625	4	0.64256
FAM129C	5	0.98686	0.98787	1	18220	0	0	0.0035063	0.017904	0.512953	626	4	2.1437
CELF3	5	0.99649	0.99717	1	18505	0	0	0.0035082	0.017904	0.512953	627	5	1.292
RABGGTB	5	0.51401	0.66334	1	11757	2	-0.57801	0.0035172	0.017904	0.512953	628	3	1.571
SIM2	5	0.99644	0.99715	1	18504	0	0	0.0035586	0.017949	0.512953	629	5	0.32991
PGPEP1L	10	0.13526	0.31991	1	5110	3	-0.37667	0.0035661	0.018014	0.512953	630	6	0.61607
SEC22C	5	0.98939	0.99027	1	18284	0	0	0.0035728	0.017968	0.512953	631	4	0.4844
MAN1A2	5	0.99642	0.9971	1	18503	0	0	0.003583	0.017994	0.512953	632	5	0.53929
KIF18A	5	0.98211	0.98338	1	18123	0	0	0.0035935	0.017994	0.512953	633	4	0.80604
SERPINE1	5	0.99641	0.9971	1	18502	0	0	0.0035939	0.017994	0.512953	634	5	0.50558
TRNP1	5	0.20627	0.38614	1	6853	2	-0.37838	0.0036063	0.018026	0.512953	635	3	0.71697
TGFBR2	5	0.99639	0.9971	1	18501	0	0	0.003608	0.018026	0.512953	636	5	0.35547
SAFB	5	0.89096	0.90106	1	16242	0	0	0.0036099	0.018026	0.512953	637	3	1.2
TRAPPC2	5	0.72485	0.77974	1	13915	1	-0.18437	0.0036272	0.018073	0.512953	638	4	0.34616
SLC25A53	5	0.99637	0.99708	1	18500	0	0	0.0036327	0.018073	0.512953	639	5	0.33413
IPO9	5	0.34012	0.51217	1	9086	2	-0.30912	0.0036532	0.01811	0.512953	640	1	6.8261
EIF1	5	0.62794	0.73744	1	13024	1	-0.2211	0.0036632	0.01811	0.512953	641	3	0.53433
DYNLL2	5	0.57164	0.71554	1	12598	1	-0.52808	0.0036684	0.018134	0.512953	642	4	0.76617
ZNF691	5	0.99633	0.99705	1	18499	0	0	0.0036729	0.018135	0.512953	643	5	0.24018
KRTAP4-1	5	0.24094	0.42878	1	7597	2	-1.137	0.0036784	0.018165	0.512953	644	3	1.2594
SNX33	5	0.99632	0.99702	1	18498	0	0	0.0036817	0.018188	0.512953	645	5	0.38946
DESI2	5	0.99631	0.99702	1	18497	0	0	0.0036867	0.018188	0.512953	646	5	0.44672
TRIM49C	3	0.47829	0.534	1	11231	1	-0.31777	0.0036933	0.014963	0.512953	647	1	6.3364
KCNK4	5	0.22877	0.42184	1	7386	3	-0.2329	0.0037022	0.01824	0.512953	648	1	6.8856
SUV420H1	5	0.9963	0.99699	1	18496	0	0	0.0037023	0.01824	0.512953	649	5	0.26106
MTMR11	5	0.89762	0.90797	1	16388	0	0	0.0037034	0.01824	0.512953	650	4	1.0578
ACTR1A	5	0.99629	0.99699	1	18495	0	0	0.0037118	0.01824	0.512953	651	5	0.54329
STUB1	5	0.4055	0.56337	1	10148	1	-0.61019	0.0037292	0.018262	0.512953	652	3	0.71295
YKT6	5	0.55254	0.70214	1	12368	1	-0.43781	0.0037329	0.018262	0.512953	653	4	1.1832
DEK	5	0.99626	0.99697	1	18494	0	0	0.0037381	0.018262	0.512953	654	5	0.6627
TAS2R3	5	0.84671	0.85759	1	15470	1	-0.21739	0.0037583	0.018262	0.512953	655	4	0.62133
DPH2	5	0.94295	0.94843	1	17313	0	0	0.0037633	0.018262	0.512953	656	4	0.84285
HTR5A	10	0.06597	0.18305	0.915094	3246	2	-0.6431	0.0037998	0.018805	0.512953	657	5	1.6281
PDCD5	5	0.9962	0.99694	1	18493	0	0	0.003802	0.018347	0.512953	658	5	0.85057
OR2T27	5	0.58877	0.72383	1	12727	1	-1.6697	0.0038424	0.018394	0.512953	659	4	1.3758
GRIN2B	5	0.98092	0.98256	1	18093	0	0	0.0038491	0.018419	0.512953	660	4	2.1023
RXRG	5	0.16903	0.32199	1	5893	2	-0.69116	0.0038503	0.01842	0.512953	661	3	1.0161
TRAPPC4	4	0.23185	0.36753	1	7447	1	-0.47504	0.003851	0.014255	0.512854	662	2	1.4614
EIF4A3	4	0.85365	0.86618	1	15577	0	0	0.003859	0.014276	0.512854	663	3	0.94814
PICALM	5	0.90317	0.91259	1	16506	0	0	0.003869	0.018443	0.512953	664	4	0.64815
MYL3	10	0.082812	0.22662	0.969464	3702	4	-0.39745	0.0038728	0.019026	0.512953	665	5	1.6152
RBP5	5	0.50818	0.65895	1	11668	2	-0.18232	0.003898	0.018469	0.512953	666	3	2.3488
BTF3L4	5	0.99608	0.99678	1	18489	0	0	0.0039189	0.018547	0.512953	667	5	0.30865
CENPL	5	0.99607	0.99678	1	18488	0	0	0.0039288	0.018547	0.512953	668	5	0.62925
ARMC8	5	0.99377	0.99427	1	18425	0	0	0.0039323	0.018547	0.512953	669	5	0.59583
STEAP1B	5	0.071871	0.15959	0.8874	3391	2	-0.6557	0.0039473	0.018548	0.512953	670	3	2.4953
PNO1	5	0.99604	0.99678	1	18487	0	0	0.0039605	0.018574	0.512953	671	5	0.82682
SLC4A8	5	0.97054	0.97241	1	17869	0	0	0.0040049	0.018696	0.512953	672	4	1.1175
CCR7	10	0.99897	0.99905	1	18612	0	0	0.0040106	0.019266	0.512953	673	6	0.69893
GCAT	5	0.99468	0.99531	1	18450	0	0	0.0040136	0.018725	0.512953	674	5	0.45451
ABI1	5	0.99597	0.99675	1	18486	0	0	0.0040321	0.018726	0.512953	675	5	0.33804
DALRD3	10	0.35177	0.61133	1	9271	2	-0.44342	0.0040489	0.01936	0.512953	676	7	0.40589
USP44	10	0.63042	0.82665	1	13041	1	-0.53942	0.0040595	0.019389	0.512953	677	7	0.36993
GTF2IRD2	5	0.043447	0.1034	0.787801	2485	1	-0.479	0.004068	0.018871	0.512953	678	4	1.8624
FXYD3	5	0.44647	0.59756	1	10744	1	-0.30994	0.0040693	0.018871	0.512953	679	3	2.2819
HTRA4	5	0.41347	0.56932	1	10270	2	-0.25368	0.0040693	0.018871	0.512953	680	2	3.3355
UBP1	5	0.37452	0.54143	1	9636	1	-0.33239	0.0040815	0.018871	0.512953	681	4	0.52626
CD300LB	5	0.96263	0.96418	1	17727	0	0	0.0040908	0.018872	0.512953	682	4	0.60945
DPM1	5	0.251	0.44123	1	7734	1	-0.6339	0.0041046	0.018872	0.512953	683	4	0.97006
DPT	5	0.47334	0.62097	1	11147	1	-0.30253	0.0041079	0.018897	0.512953	684	4	0.45422
HIRIP3	5	0.61368	0.73426	1	12912	1	-0.23585	0.0041114	0.018898	0.512953	685	4	0.4725
IGF2R	5	0.66336	0.75327	1	13349	1	-0.36074	0.0041167	0.018948	0.512953	686	4	0.68495
KDM4E	5	0.52797	0.67818	1	11985	1	-0.22848	0.0041482	0.019114	0.512953	687	4	0.82163
TMEM110	5	0.86297	0.87173	1	15748	1	-0.17729	0.0041547	0.019114	0.512953	688	4	0.65868
ALS2CL	5	0.99582	0.99647	1	18482	0	0	0.0041822	0.019142	0.512953	689	5	0.40517
PRSS33	10	0.22828	0.4842	1	7374	1	-0.61943	0.0041893	0.01972	0.512983	690	7	0.46505
PIGN	5	0.015573	0.041389	0.645653	1201	2	-0.54594	0.0041917	0.019142	0.512953	691	2	3.3804
PITPNC1	5	0.9958	0.99647	1	18481	0	0	0.0041989	0.019142	0.512953	692	5	0.33855
METTL1	5	0.42808	0.58387	1	10468	1	-0.98167	0.0042043	0.019142	0.512953	693	4	0.62077
SP9	5	0.9951	0.9958	1	18465	0	0	0.00421	0.019172	0.512953	694	5	0.50225
RNF212	5	0.90134	0.91144	1	16459	0	0	0.0042172	0.019173	0.512953	695	4	0.55431
ZNF177	10	0.10469	0.2691	0.990125	4243	5	-0.28352	0.0042283	0.019787	0.512983	696	3	1.3063
CTF1	5	0.085164	0.18011	0.909742	3774	3	-0.38579	0.0042406	0.019234	0.512953	697	1	6.8295
KDSR	5	0.96323	0.96473	1	17738	0	0	0.0042533	0.019234	0.512953	698	3	0.92422
ZBED6	5	0.54558	0.69557	1	12266	1	-1.2881	0.0042622	0.019262	0.512953	699	4	0.67276
CACNG2	5	0.99451	0.99494	1	18444	0	0	0.0042894	0.019262	0.512953	700	5	0.47953
RHOXF2	5	0.88122	0.89098	1	16057	0	0	0.0042896	0.019262	0.512953	701	2	3.3958
OLA1	5	0.99383	0.99435	1	18427	0	0	0.0042976	0.019262	0.512953	702	5	0.36321
ARPC3	10	0.95755	0.97221	1	17605	1	-0.23655	0.0043018	0.024497	0.581887	703	8	0.77988
LANCL3	5	0.82001	0.83767	1	15046	1	-0.21435	0.0043385	0.019262	0.512953	704	2	3.6658
DNM2	5	0.42915	0.58436	1	10485	1	-2.5182	0.0043428	0.019262	0.512953	705	4	1.3307
PIPOX	5	0.97833	0.97899	1	18037	0	0	0.0043717	0.01934	0.512953	706	4	0.41607
ABCA3	5	0.63558	0.74053	1	13079	1	-0.51063	0.0043772	0.019369	0.512953	707	4	0.86098
DMD	5	0.97148	0.97328	1	17895	0	0	0.0043875	0.019395	0.512953	708	2	3.41
EDA2R	5	0.86185	0.87039	1	15720	1	-0.10971	0.0043929	0.019395	0.512953	709	4	0.48213
NELFB	5	0.89083	0.90106	1	16239	0	0	0.0043971	0.019395	0.512953	710	3	0.93961
PAX1	5	0.9956	0.99623	1	18477	0	0	0.0043991	0.019395	0.512953	711	5	0.28201
IQCC	5	0.99559	0.99623	1	18476	0	0	0.0044074	0.019432	0.512953	712	5	0.52632
CTAG1A	5	0.97864	0.98007	1	18044	0	0	0.0044087	0.019457	0.512953	713	4	0.3692
DNAJC28	5	0.99557	0.99621	1	18475	0	0	0.0044286	0.019457	0.512953	714	5	0.26466
RAB8A	5	0.97267	0.97416	1	17920	0	0	0.0044447	0.019513	0.512953	715	3	0.77141
FBXO11	5	0.99305	0.99378	1	18407	0	0	0.004502	0.019574	0.512953	716	5	0.35682
GTF3C3	5	0.99398	0.9944	1	18431	0	0	0.0045077	0.019575	0.512953	717	5	0.86418
ADAM2	5	0.27793	0.46093	1	8148	1	-0.34917	0.0045282	0.019575	0.512953	718	4	0.75852
ACOT7	5	0.87097	0.8804	1	15881	1	-0.12062	0.0045343	0.019575	0.512953	719	1	6.5154
LRRC53	5	0.30741	0.48202	1	8570	2	-0.2623	0.0045402	0.019648	0.512983	720	3	1.0798
URM1	5	0.99544	0.99608	1	18472	0	0	0.004558	0.019674	0.512983	721	5	0.59748
CCL24	4	0.99541	0.99584	1	18471	0	0	0.0045942	0.021379	0.519002	722	4	0.37596
MGST1	5	0.15298	0.28956	0.994898	5511	2	-0.26373	0.0046077	0.019931	0.512983	723	3	2.2364
BAG4	5	0.99539	0.99599	1	18470	0	0	0.0046103	0.019931	0.512983	724	5	0.25416
ZNF382	5	0.33581	0.50637	1	9028	1	-0.36784	0.0046156	0.019931	0.512983	725	4	0.3955
SEC14L6	4	0.99538	0.99584	1	18469	0	0	0.0046227	0.02138	0.519002	726	4	0.3874
KCNAB2	9	0.97226	0.9757	1	17911	1	-0.14952	0.0046312	0.031094	0.669355	727	6	1.4592
ASXL1	5	0.54501	0.69501	1	12259	2	-0.16706	0.0046334	0.019963	0.512983	728	3	0.45774
MYLK	10	0.92527	0.96419	1	16949	1	-0.35273	0.0046555	0.034856	0.694756	729	5	1.7865
FAM110D	5	0.30407	0.47646	1	8516	1	-0.45534	0.0046573	0.019993	0.512983	730	4	0.76035
SREBF2	5	0.88667	0.89628	1	16158	0	0	0.0046642	0.020016	0.512983	731	4	1.3447
GDI2	10	0.75543	0.89815	1	14249	1	-0.4561	0.0046673	0.034856	0.694756	732	7	0.38112
UBALD1	5	0.68455	0.76507	1	13535	1	-0.48534	0.0046834	0.020016	0.512983	733	4	0.53248
C16orf93	5	0.97415	0.97532	1	17956	0	0	0.0047115	0.020077	0.512983	734	4	0.82508
RAPGEF3	5	0.1675	0.31798	1	5849	1	-0.45477	0.00473	0.020107	0.512983	735	4	1.8201
PAFAH1B1	5	0.99431	0.99478	1	18439	0	0	0.0047329	0.020107	0.512983	736	5	0.85126
WDR20	5	0.97326	0.97518	1	17932	0	0	0.0047671	0.020164	0.512983	737	4	0.53049
CDK5RAP3	5	0.25648	0.44325	1	7819	1	-0.60643	0.0047799	0.020165	0.512983	738	4	0.37095
C16orf62	5	0.13231	0.26287	0.984954	5030	2	-0.54497	0.0047839	0.020165	0.512983	739	3	0.91706
SEC24C	5	0.97616	0.97773	1	17993	0	0	0.0047906	0.020193	0.512983	740	3	0.66142
RELT	5	0.95494	0.95697	1	17562	0	0	0.0047955	0.020193	0.512983	741	4	0.63623
NDRG4	5	0.85271	0.86398	1	15558	1	-0.11087	0.0048033	0.020235	0.512983	742	1	6.4255
FOXF2	5	0.98642	0.98755	1	18209	0	0	0.0048134	0.02026	0.512983	743	4	0.51513
ORM1	4	0.66959	0.71509	1	13400	1	-0.1976	0.0048267	0.02172	0.526586	744	2	1.6285
DNAJC7	5	0.99515	0.99583	1	18467	0	0	0.0048474	0.020357	0.512983	745	5	0.31762
RFX3	5	0.00011437	0.00023476	0.028642	153	3	-0.6845	0.0048535	0.020357	0.512983	746	2	3.469
PRKRIP1	5	0.87271	0.8841	1	15911	1	-0.097787	0.0048637	0.020358	0.512983	747	3	0.76335
CALR3	5	0.83765	0.85028	1	15325	1	-0.13169	0.0048767	0.020358	0.512983	748	3	2.2875
GPR116	10	0.90271	0.95822	1	16494	1	-1.371	0.0048829	0.035292	0.694756	749	7	0.52673
CHID1	5	0.9951	0.9958	1	18466	0	0	0.0048966	0.020381	0.512983	750	5	0.34364
PLCXD2	5	0.9951	0.9958	1	18464	0	0	0.0049043	0.020412	0.512983	751	5	0.33004
WARS	5	0.99508	0.9958	1	18462	0	0	0.0049232	0.020444	0.512983	752	5	0.32157
ZNF575	5	0.69716	0.76793	1	13655	1	-0.17709	0.0049256	0.020469	0.512983	753	1	6.4034
OR8A1	5	0.99507	0.99578	1	18461	0	0	0.0049323	0.020469	0.512983	754	5	0.31221
LRP3	5	0.99505	0.99575	1	18460	0	0	0.0049505	0.020526	0.512983	755	5	0.51664
HIBCH	5	0.0091123	0.022497	0.469664	904	4	-0.47297	0.0049746	0.020557	0.512983	756	1	6.4667
FOXE3	5	0.95731	0.95928	1	17601	0	0	0.0050122	0.020588	0.512983	757	4	0.34538
BPIFB1	5	0.96624	0.96827	1	17777	0	0	0.0050149	0.020588	0.512983	758	4	0.50961
CNTN5	5	0.86206	0.87039	1	15725	1	-0.34367	0.0050235	0.020613	0.512983	759	3	2.5311
GATAD1	5	0.72724	0.78155	1	13936	1	-0.39	0.0050515	0.020613	0.512983	760	3	0.58164
RLIM	5	0.98371	0.98485	1	18159	0	0	0.0050577	0.020645	0.513103	761	4	0.52623
EGFL6	5	0.068263	0.15275	0.873933	3302	3	-0.48191	0.0050724	0.020725	0.5144	762	1	6.4624
DHRSX	5	0.99488	0.99555	1	18459	0	0	0.0051157	0.02088	0.515117	763	5	0.27656
XPNPEP2	5	0.45969	0.61019	1	10929	2	-0.26241	0.0051258	0.020909	0.515117	764	3	1.0788
MAML3	5	0.99487	0.99555	1	18458	0	0	0.0051273	0.020909	0.515117	765	5	0.25797
SEMA3B	10	0.90835	0.96055	1	16617	2	-0.0975	0.0051527	0.036234	0.694756	766	7	1.2815
CCDC88A	5	0.49897	0.64662	1	11540	1	-1.251	0.0051555	0.020941	0.515117	767	4	0.65656
GOT1	5	0.99484	0.99552	1	18457	0	0	0.0051563	0.020941	0.515117	768	5	0.29194
PPFIA3	10	0.67538	0.85419	1	13448	2	-0.34738	0.0051692	0.036234	0.694756	769	6	0.54122
WTIP	5	0.99482	0.99552	1	18456	0	0	0.0051752	0.020973	0.515117	770	5	0.52018
AP2A2	5	0.98275	0.98389	1	18139	0	0	0.0051785	0.020973	0.515117	771	4	0.52726
ST7L	5	0.83041	0.84173	1	15215	1	-0.22686	0.0051811	0.020973	0.515117	772	3	0.87349
GALK2	10	0.51486	0.75867	1	11768	2	-0.40858	0.0051856	0.036234	0.694756	773	5	0.48054
C1GALT1C1	5	0.81254	0.82996	1	14941	1	-0.16032	0.0052191	0.021098	0.517508	774	1	6.6084
KIFAP3	5	0.052606	0.12716	0.832195	2858	1	-0.86955	0.005235	0.021175	0.518042	775	3	0.64982
CKAP2L	5	0.99291	0.99368	1	18398	0	0	0.0052392	0.021175	0.518042	776	5	0.71094
PARM1	5	0.68879	0.76555	1	13569	1	-1.1667	0.005268	0.021209	0.518193	777	2	1.9566
VNN2	10	0.3426	0.6039	1	9127	2	-0.37789	0.0052787	0.036436	0.694756	778	7	1.432
SRRM4	5	0.97135	0.97328	1	17890	0	0	0.0052834	0.021298	0.519002	779	4	0.56664
ZNF28	5	0.87911	0.88915	1	16016	1	-0.13934	0.0052919	0.021299	0.519002	780	4	0.80036
RNF40	5	0.92624	0.93602	1	16972	0	0	0.0053018	0.021327	0.519002	781	4	0.67004
FCN1	4	0.79286	0.80313	1	14689	1	-0.20965	0.0053127	0.022746	0.550749	782	2	3.1747
PCBP1	5	0.99468	0.99531	1	18451	0	0	0.0053188	0.023721	0.572141	783	5	1.1691
YOD1	5	0.99468	0.99531	1	18449	0	0	0.0053225	0.023721	0.572141	784	5	0.43524
NKIRAS1	5	0.8198	0.83767	1	15041	1	-0.14851	0.0053265	0.023721	0.572141	785	3	0.69565
TFAP2C	5	0.96566	0.96688	1	17770	0	0	0.0053354	0.023787	0.572994	786	4	0.3841
DCLRE1C	5	0.99465	0.99519	1	18448	0	0	0.0053509	0.023827	0.573212	787	5	0.43563
CNN2	5	0.81607	0.83315	1	14983	1	-0.23024	0.0053658	0.023858	0.573238	788	3	2.5264
CCDC102B	3	0.12069	0.20189	0.956611	4703	2	-0.81504	0.0053677	0.020217	0.512983	789	1	6.3551
ZNF814	5	0.92832	0.93807	1	17014	0	0	0.005379	0.023934	0.574314	790	4	2.026
SHANK3	5	0.90721	0.91815	1	16591	0	0	0.0053905	0.023993	0.575009	791	3	0.65233
EFNA1	4	0.15875	0.28928	0.994898	5651	1	-0.3411	0.005391	0.024936	0.590832	792	2	3.3415
FOXG1	5	0.1266	0.25105	0.975476	4879	1	-0.61299	0.0054147	0.024054	0.575739	793	4	1.8026
ACTL10	5	0.99453	0.99497	1	18445	0	0	0.0054701	0.024358	0.581887	794	5	0.313
WTAP	5	0.93547	0.94327	1	17163	0	0	0.005488	0.024385	0.581887	795	4	0.55433
PDE1A	7	0.8107	0.88395	1	14910	1	-0.18406	0.0054893	0.027632	0.644936	796	5	0.94657
HSD17B12	5	0.9945	0.9949	1	18443	0	0	0.0055037	0.024455	0.581887	797	5	1.0089
CALR	5	0.83548	0.84712	1	15287	1	-0.55805	0.0055056	0.024455	0.581887	798	4	0.57864
A4GNT	5	0.99446	0.99486	1	18442	0	0	0.0055351	0.024488	0.581887	799	5	0.36016
ACTL8	5	0.74965	0.79845	1	14184	1	-0.32682	0.0055543	0.02453	0.581939	800	3	1.0209
RPS25	5	0.87525	0.88594	1	15956	1	-0.11006	0.0055725	0.026951	0.632989	801	3	0.78197
RERE	5	0.99156	0.9923	1	18351	0	0	0.0056007	0.026951	0.632989	802	4	0.60706
ARF6	10	0.71864	0.88168	1	13851	2	-0.44543	0.0056048	0.037103	0.703455	803	8	0.74736
CEP44	5	0.99439	0.99481	1	18441	0	0	0.0056093	0.026951	0.632989	804	5	0.38968
GPR56	5	0.82096	0.83767	1	15057	1	-0.41822	0.0056538	0.02941	0.669355	805	4	0.91518
NUDT10	5	0.96837	0.96959	1	17824	0	0	0.0056591	0.02941	0.669355	806	3	2.467
EYA4	5	0.99434	0.99481	1	18440	0	0	0.0056646	0.02941	0.669355	807	5	0.3212
EMC7	5	0.80397	0.82544	1	14819	1	-0.24954	0.0056692	0.02941	0.669355	808	4	1.9163
CASQ2	5	0.1783	0.33867	1	6155	1	-0.74337	0.005687	0.029438	0.669355	809	2	1.2713
AHCYL1	10	0.56035	0.78335	1	12489	1	-0.53812	0.0056996	0.037206	0.704692	810	7	0.51554
RALB	5	0.70669	0.77198	1	13752	1	-0.28272	0.005708	0.029471	0.669355	811	2	3.5362
DUSP23	5	0.98659	0.98763	1	18214	0	0	0.0057689	0.029645	0.669355	812	4	0.40295
C1QTNF6	4	0.18145	0.32155	1	6256	2	-0.84621	0.0057822	0.025482	0.602248	813	2	3.3577
LRIG2	5	0.83008	0.84173	1	15213	1	-0.20122	0.0057845	0.029677	0.669355	814	3	0.65752
NDUFA4L2	5	0.99421	0.9947	1	18438	0	0	0.0057902	0.02972	0.669355	815	5	0.48191
KIAA1328	5	0.1117	0.22647	0.969464	4450	1	-1.0476	0.0058035	0.02972	0.669355	816	3	2.3671
SRCIN1	5	0.60087	0.72931	1	12816	1	-0.64941	0.005805	0.02972	0.669355	817	3	0.50616
MRGPRX4	5	0.99419	0.9947	1	18437	0	0	0.0058102	0.02972	0.669355	818	5	0.35275
C2orf54	5	0.52027	0.67103	1	11864	1	-0.21021	0.0058302	0.02976	0.669355	819	4	1.8226
USP35	5	0.5254	0.6765	1	11943	2	-0.20127	0.0058302	0.02976	0.669355	820	3	2.2822
DECR2	5	0.62667	0.73744	1	13011	1	-0.31204	0.0058333	0.02976	0.669355	821	4	0.43442
E2F6	5	0.99417	0.99465	1	18436	0	0	0.0058342	0.02976	0.669355	822	5	0.32614
TMEM45B	4	0.81342	0.82585	1	14948	1	-0.12707	0.0058409	0.025589	0.604016	823	1	6.1951
GRK1	5	0.99415	0.99465	1	18435	0	0	0.0058494	0.02976	0.669355	824	5	0.3022
ZNF853	10	0.86512	0.93881	1	15785	2	-0.17939	0.0058567	0.037683	0.71211	825	8	0.58993
ZNF276	5	0.41452	0.57087	1	10284	1	-0.30714	0.0058629	0.02976	0.669355	826	4	0.38194
ADAT1	5	0.55832	0.70652	1	12459	1	-0.54906	0.0058686	0.02976	0.669355	827	4	0.33563
RHOBTB3	5	0.99413	0.99465	1	18434	0	0	0.0058687	0.02976	0.669355	828	5	0.24659
TMEM229B	10	0.19796	0.43121	1	6658	2	-0.89459	0.0058704	0.037711	0.71211	829	6	0.65379
HIST1H2AM	5	0.99412	0.99461	1	18433	0	0	0.00588	0.02983	0.669355	830	5	0.18135
TMEM165	5	0.96894	0.9704	1	17833	0	0	0.0058891	0.029859	0.669355	831	4	0.67343
BRWD1	5	0.78321	0.8145	1	14556	1	-0.20447	0.0058914	0.029859	0.669355	832	3	0.52734
CLDN8	5	0.88779	0.89763	1	16178	0	0	0.0059035	0.029859	0.669355	833	2	3.3378
PRPS2	5	0.99406	0.99453	1	18432	0	0	0.0059367	0.030007	0.669355	834	5	0.36312
PYCR1	5	0.99263	0.9935	1	18384	0	0	0.0059384	0.030007	0.669355	835	4	0.39928
MESP2	5	0.44288	0.59355	1	10692	1	-0.30393	0.0059438	0.030007	0.669355	836	4	1.8383
ARL6	5	0.99098	0.99173	1	18329	0	0	0.0059672	0.030197	0.669355	837	4	0.43691
DYNLT3	5	0.98852	0.98953	1	18258	0	0	0.0059718	0.030197	0.669355	838	4	0.4532
MORN3	5	0.4882	0.63934	1	11382	1	-0.32996	0.0060013	0.030198	0.669355	839	2	3.4223
CAPZB	5	0.99396	0.9944	1	18430	0	0	0.0060382	0.03028	0.669355	840	5	0.93579
CSNK2A2	5	0.91681	0.92804	1	16798	0	0	0.0060512	0.03028	0.669355	841	3	0.74071
TMEM74	5	0.78325	0.8145	1	14558	1	-0.21428	0.0060519	0.03028	0.669355	842	4	0.34687
UBE2M	5	0.78611	0.81582	1	14589	1	-0.163	0.0060589	0.03028	0.669355	843	4	0.37962
THSD4	9	0.65708	0.83804	1	13280	2	-0.38716	0.0060663	0.034405	0.694756	844	7	1.2151
ECI1	5	0.98929	0.99015	1	18276	0	0	0.0060986	0.03028	0.669355	845	4	0.44165
XKR5	5	0.52632	0.6765	1	11955	2	-0.21612	0.006099	0.03028	0.669355	846	2	3.3709
UBE2K	5	0.99389	0.9944	1	18429	0	0	0.0061052	0.03028	0.669355	847	5	0.29341
LRBA	5	0.81253	0.82996	1	14940	1	-0.21324	0.0061127	0.030322	0.669355	848	4	0.63264
KANSL1	4	0.99389	0.99437	1	18428	0	0	0.0061147	0.026478	0.624216	849	4	0.67287
MUC3A	5	0.88861	0.8993	1	16195	0	0	0.0061174	0.030354	0.669355	850	4	0.86885
PAF1	5	0.9275	0.93749	1	16996	0	0	0.0061595	0.030436	0.669355	851	4	1.6947
NDUFV1	10	0.0019386	0.0074145	0.297675	410	7	-1.0505	0.0061704	0.038736	0.728684	852	2	3.4029
ZNF595	10	0.42507	0.68883	1	10425	4	-0.33967	0.0061725	0.038736	0.728684	853	5	0.38567
FAM135B	5	0.99377	0.99427	1	18424	0	0	0.0062317	0.030551	0.669355	854	5	0.83306
TMEM221	5	0.29141	0.46963	1	8327	2	-1.2183	0.0062456	0.030625	0.669355	855	2	3.7888
ELOVL1	5	0.99375	0.99418	1	18423	0	0	0.0062529	0.030625	0.669355	856	5	0.30805
TET2	5	0.72459	0.77974	1	13912	1	-0.31291	0.0062835	0.030794	0.669355	857	4	0.51084
CAMK2G	5	0.97255	0.974	1	17916	0	0	0.0063002	0.030846	0.669355	858	4	0.65264
OBSCN	5	0.73678	0.78564	1	14033	1	-0.36224	0.0063226	0.030927	0.669355	859	2	1.1207
ACLY	5	0.99368	0.99408	1	18421	0	0	0.0063244	0.030927	0.669355	860	5	0.44912
TYROBP	5	0.99367	0.99404	1	18420	0	0	0.0063287	0.030963	0.669355	861	5	0.22541
GTF3C5	5	0.42175	0.57835	1	10387	2	-0.19473	0.0063295	0.030963	0.669355	862	3	1.149
MROH8	5	0.93382	0.94169	1	17124	0	0	0.0063601	0.031046	0.669355	863	4	0.74858
FAM50A	5	0.99361	0.99399	1	18419	0	0	0.0063879	0.031047	0.669355	864	5	0.45835
SETD7	5	0.36115	0.53697	1	9431	1	-0.4815	0.0063883	0.031047	0.669355	865	4	0.66577
PFKFB2	5	0.56433	0.71282	1	12550	2	-0.16875	0.0063909	0.031047	0.669355	866	3	0.52624
TMOD1	5	0.036609	0.087044	0.748606	2191	3	-0.74779	0.0063922	0.031047	0.669355	867	1	4.4756
SAC3D1	5	0.92373	0.93515	1	16923	0	0	0.0063992	0.031047	0.669355	868	4	1.9118
HYDIN	5	0.9936	0.99399	1	18418	0	0	0.0064034	0.031047	0.669355	869	5	0.35822
NGEF	5	0.96134	0.9627	1	17695	0	0	0.0064126	0.031047	0.669355	870	4	0.49358
LRCH4	10	0.15535	0.35246	1	5570	5	-0.20526	0.0064146	0.039463	0.732444	871	4	1.8554
RPL17	4	0.81511	0.827	1	14967	1	-0.48331	0.0064242	0.027384	0.642334	872	2	2.2807
FUBP1	5	0.71657	0.77708	1	13837	1	-0.15768	0.0064307	0.031088	0.669355	873	3	0.69944
SMAGP	5	0.2375	0.42468	1	7542	1	-0.5489	0.0064411	0.031127	0.669355	874	4	1.8345
MKX	10	0.85306	0.93252	1	15565	2	-0.27529	0.0064562	0.039596	0.732981	875	6	1.464
VWA2	4	0.91585	0.91938	1	16779	0	0	0.0064762	0.027476	0.642892	876	3	0.44298
PPP1R3F	5	0.67039	0.75641	1	13409	1	-0.17552	0.0064781	0.031169	0.669355	877	3	0.5884
ZC3HAV1L	4	0.0032372	0.0072923	0.293394	515	1	-1.834	0.0064793	0.027476	0.642892	878	3	0.74937
XPC	9	0.42956	0.68164	1	10490	3	-0.66407	0.006511	0.035598	0.694756	879	5	0.65747
SLC24A1	10	0.17458	0.38583	1	6054	4	-0.62921	0.0065122	0.039808	0.736167	880	3	2.4338
AGPAT4	5	0.97873	0.98007	1	18048	0	0	0.0065128	0.031206	0.669355	881	4	0.84483
OVOL1	5	0.78028	0.81171	1	14517	1	-0.23354	0.00653	0.031248	0.669355	882	4	0.37157
COQ3	5	0.038936	0.093763	0.769672	2285	2	-0.78785	0.0065388	0.031248	0.669355	883	3	2.2732
TVP23B	5	0.96339	0.96511	1	17741	0	0	0.006539	0.031248	0.669355	884	4	0.53215
RAB7A	5	0.15796	0.2986	1	5634	1	-0.49996	0.0065447	0.031248	0.669355	885	4	0.75506
SLC35B1	5	0.9706	0.97241	1	17873	0	0	0.0065713	0.031249	0.669355	886	4	0.53999
PNPLA1	5	0.73602	0.78473	1	14024	1	-0.26133	0.0066057	0.031329	0.669355	887	3	0.53186
SLMAP	5	0.99339	0.9939	1	18416	0	0	0.0066143	0.031329	0.669355	888	5	0.50356
MORC2	4	0.86803	0.883	1	15843	0	0	0.0066342	0.027559	0.644038	889	3	0.58956
COPE	5	0.73918	0.78886	1	14065	1	-0.16543	0.0066403	0.031381	0.669355	890	3	1.0705
SIGMAR1	5	0.94183	0.94793	1	17291	0	0	0.0066428	0.031381	0.669355	891	4	0.51011
PEX5	5	0.88499	0.8941	1	16127	0	0	0.0066787	0.031421	0.669355	892	3	1.3111
FHL3	5	0.5288	0.67871	1	12000	1	-0.31219	0.0066851	0.031421	0.669355	893	4	0.64574
PPCDC	10	0.90207	0.95803	1	16480	2	-0.15644	0.0066923	0.040071	0.740311	894	8	0.31095
KIF13A	5	0.015339	0.040936	0.645653	1186	2	-0.37271	0.0067076	0.033857	0.694756	895	2	0.54709
TSPAN19	4	0.86094	0.87612	1	15700	0	0	0.0067492	0.027739	0.64584	896	3	0.8689
TLX3	5	0.079525	0.1694	0.887821	3613	1	-1.1797	0.0067822	0.034007	0.694756	897	4	0.59674
USP7	5	0.035696	0.08477	0.742855	2149	2	-1.0135	0.0068074	0.034051	0.694756	898	2	3.3861
BACH1	5	0.99112	0.99179	1	18334	0	0	0.0068084	0.034051	0.694756	899	4	0.43289
RWDD2A	4	0.28722	0.43054	1	8268	2	-0.19789	0.0068379	0.027739	0.64584	900	1	6.3066
TOX4	5	0.99316	0.99381	1	18415	0	0	0.0068443	0.034129	0.694756	901	5	0.5364
SCGB1D2	5	0.99315	0.99381	1	18414	0	0	0.0068452	0.034129	0.694756	902	5	0.36227
NDNL2	5	0.99315	0.99381	1	18413	0	0	0.0068507	0.034129	0.694756	903	5	0.36773
TMEM102	5	0.99313	0.99381	1	18412	0	0	0.0068707	0.034129	0.694756	904	5	0.48635
SAMD1	4	0.99312	0.99389	1	18411	0	0	0.006883	0.027847	0.647553	905	4	0.55279
IRF8	5	0.99312	0.99381	1	18410	0	0	0.0068835	0.034129	0.694756	906	5	0.25475
CFD	5	0.97091	0.97284	1	17881	0	0	0.0069134	0.034173	0.694756	907	4	0.48086
TP53BP1	10	0.67897	0.85419	1	13480	1	-0.38823	0.0069266	0.041187	0.760135	908	8	0.35789
PPM1N	5	0.99306	0.99378	1	18409	0	0	0.0069368	0.034206	0.694756	909	5	0.49116
NCOA4	5	0.99306	0.99378	1	18408	0	0	0.0069405	0.034206	0.694756	910	5	0.25979
TRIM27	5	0.28204	0.46318	1	8200	2	-0.27677	0.0069603	0.034207	0.694756	911	3	0.60911
DNASE2B	5	0.99302	0.99373	1	18406	0	0	0.0069755	0.034247	0.694756	912	5	0.27947
DNAJB1	5	0.8942	0.90396	1	16313	0	0	0.0069784	0.034248	0.694756	913	2	3.5727
CYP2E1	5	0.99302	0.99373	1	18405	0	0	0.006982	0.034248	0.694756	914	5	0.298
MEPCE	5	0.993	0.99373	1	18404	0	0	0.0070005	0.034296	0.694756	915	5	0.35685
BCL9L	5	0.554	0.70379	1	12384	2	-0.17602	0.0070272	0.034297	0.694756	916	3	2.3979
ANXA8	5	0.99297	0.99373	1	18403	0	0	0.0070275	0.034297	0.694756	917	5	0.32869
GATC	5	0.99294	0.99368	1	18402	0	0	0.0070582	0.034339	0.694756	918	5	0.23667
CLSTN2	5	0.99294	0.99368	1	18401	0	0	0.0070638	0.034339	0.694756	919	5	0.47006
PRR25	5	0.99293	0.99368	1	18400	0	0	0.0070657	0.034339	0.694756	920	5	0.29202
TM9SF4	5	0.86088	0.86992	1	15696	1	-0.10884	0.0070698	0.034339	0.694756	921	3	0.88159
EPHB4	5	0.99291	0.99368	1	18397	0	0	0.0070938	0.034384	0.694756	922	5	0.39493
PIGT	5	0.98753	0.98858	1	18232	0	0	0.0070995	0.034384	0.694756	923	4	0.49929
MLST8	5	0.87796	0.88777	1	15993	1	-0.12566	0.0071328	0.034385	0.694756	924	4	0.41691
METTL11B	5	0.99286	0.99368	1	18396	0	0	0.0071351	0.034385	0.694756	925	5	0.44341
RAB11B	5	0.98783	0.9888	1	18239	0	0	0.0071525	0.034427	0.694756	926	4	0.37128
HAUS5	5	0.88752	0.89763	1	16172	0	0	0.0071527	0.034427	0.694756	927	4	1.6984
KRT17	5	0.12051	0.24291	0.97123	4699	2	-0.3806	0.0071737	0.034471	0.694756	928	2	3.4529
RASL10B	5	0.99283	0.99368	1	18395	0	0	0.0071738	0.034471	0.694756	929	5	0.35924
CTGF	5	0.99282	0.99368	1	18394	0	0	0.0071842	0.034471	0.694756	930	5	0.40074
NEUROD1	3	0.99281	0.99397	1	18393	0	0	0.0071946	0.025296	0.598605	931	3	0.43841
TLDC1	5	0.48797	0.63934	1	11379	1	-0.35853	0.0072641	0.034759	0.694756	932	3	0.70902
E2F1	5	0.99273	0.9936	1	18390	0	0	0.0072689	0.0348	0.694756	933	5	0.41
EPPK1	5	0.97508	0.97616	1	17970	0	0	0.0072957	0.03484	0.694756	934	4	1.8239
ODAM	5	0.99269	0.99356	1	18388	0	0	0.0073139	0.034881	0.694756	935	5	0.44066
LAP3	5	0.25422	0.44244	1	7785	2	-0.35189	0.0073289	0.034929	0.694756	936	3	0.48509
C1orf222	5	0.25454	0.44244	1	7788	1	-0.58983	0.0073378	0.034929	0.694756	937	3	1.7284
CHRND	5	0.46094	0.61083	1	10952	1	-0.83533	0.007369	0.03498	0.694756	938	2	3.4131
EMC4	5	0.76549	0.80577	1	14359	1	-0.12709	0.0073744	0.03498	0.694756	939	4	0.79472
NFE2L1	5	0.98113	0.98256	1	18100	0	0	0.0074355	0.03503	0.694756	940	3	0.78912
MTL5	5	0.76492	0.80577	1	14351	1	-0.20907	0.0074379	0.03503	0.694756	941	4	0.42334
SNX4	5	0.89644	0.90797	1	16364	0	0	0.0074474	0.035075	0.694756	942	4	0.60678
ESAM	10	0.47587	0.74	1	11185	1	-1.1279	0.0074724	0.042001	0.760135	943	8	0.42201
NAT16	10	0.64996	0.83818	1	13211	3	-0.42072	0.0074882	0.042001	0.760135	944	4	1.9952
CORT	5	0.17515	0.33143	1	6066	2	-0.61969	0.0075642	0.035166	0.694756	945	3	2.448
CD53	5	0.93904	0.94569	1	17231	0	0	0.0076049	0.035218	0.694756	946	4	0.92099
PLXNA2	5	0.21378	0.39695	1	7054	2	-0.48883	0.007613	0.035218	0.694756	947	3	2.3447
SEPHS2	5	0.93626	0.94356	1	17181	0	0	0.0076168	0.035219	0.694756	948	3	0.94487
IDUA	5	0.95368	0.95676	1	17533	0	0	0.0076221	0.035219	0.694756	949	4	0.41955
HUS1B	5	0.21582	0.40073	1	7096	3	-0.30636	0.0076424	0.035219	0.694756	950	2	1.0673
MFSD5	5	0.50314	0.65278	1	11596	1	-0.41662	0.0076801	0.035366	0.694756	951	4	0.43597
ACTR2	4	0.9331	0.93627	1	17108	0	0	0.0077028	0.032789	0.694756	952	3	0.96651
WDFY3	5	0.65939	0.75184	1	13305	1	-0.49367	0.0077092	0.035366	0.694756	953	4	0.31936
ENSA	5	0.45255	0.6061	1	10822	2	-0.58747	0.0077106	0.035366	0.694756	954	2	3.4456
SS18	5	0.79993	0.82411	1	14768	1	-0.41374	0.0077143	0.035366	0.694756	955	4	0.61635
S100A6	5	0.91461	0.92672	1	16750	0	0	0.0077245	0.035418	0.694756	956	4	0.41444
RBM42	5	0.97671	0.97785	1	18004	0	0	0.007737	0.035418	0.694756	957	4	1.2686
DPH1	10	0.99919	0.99929	1	18620	0	0	0.0077419	0.042856	0.760352	958	8	0.35515
LRRC41	5	0.63451	0.74053	1	13071	1	-1.44	0.007771	0.035418	0.694756	959	3	0.58032
KLC4	5	0.092056	0.19643	0.945139	3943	3	-0.23867	0.0077839	0.035464	0.694756	960	1	6.1315
C10orf2	5	0.015931	0.041614	0.645653	1214	2	-0.81757	0.0077839	0.035464	0.694756	961	1	6.1315
CCDC83	5	0.87198	0.88179	1	15901	1	-0.14093	0.0078195	0.035503	0.694756	962	3	0.73688
C1orf192	5	0.71152	0.77288	1	13800	1	-0.35373	0.0078503	0.035563	0.694756	963	4	0.43279
SLC4A5	10	0.45991	0.72725	1	10934	4	-0.23208	0.0078783	0.042977	0.761533	964	5	1.5226
NAALADL2	5	0.34566	0.51995	1	9179	1	-2.9837	0.0078815	0.035611	0.694756	965	1	6.3884
MPP6	5	0.44815	0.5981	1	10766	2	-0.32525	0.0078815	0.035611	0.694756	966	3	2.4571
ANXA2R	4	0.99209	0.99311	1	18367	0	0	0.0079146	0.033201	0.694756	967	4	0.46952
YY1AP1	5	0.56015	0.70898	1	12486	1	-0.5057	0.0079546	0.035672	0.694756	968	3	2.3839
RET	10	0.55553	0.78114	1	12404	3	-0.26467	0.0079991	0.043517	0.768457	969	6	0.45706
BRF1	5	0.46927	0.6183	1	11085	1	-1.9533	0.0080313	0.035823	0.694756	970	3	0.92138
TMEM55A	5	0.70787	0.77198	1	13761	1	-0.28197	0.0080522	0.035823	0.694756	971	4	1.6405
MPHOSPH6	5	0.51213	0.66227	1	11718	1	-2.0379	0.0080631	0.035823	0.694756	972	4	0.68291
FAM81B	5	0.17038	0.32326	1	5935	2	-0.36556	0.008101	0.035862	0.694756	973	2	3.1857
SNX13	5	0.98054	0.98213	1	18083	0	0	0.0081049	0.035862	0.694756	974	4	0.47734
SIAH1	5	0.97336	0.97518	1	17938	0	0	0.0081115	0.035862	0.694756	975	4	0.68515
TECPR2	5	0.19997	0.37704	1	6698	2	-1.0684	0.0081742	0.03614	0.694756	976	1	6.1682
CSRP3	5	0.78268	0.81402	1	14545	1	-0.17123	0.0081742	0.03614	0.694756	977	2	3.2034
CTAG2	5	0.063094	0.14621	0.866045	3167	1	-0.93221	0.0081786	0.03614	0.694756	978	4	0.59428
SPI1	5	0.44583	0.59755	1	10735	1	-0.2661	0.0081815	0.03614	0.694756	979	4	0.3289
FAM162A	5	0.012684	0.0326	0.585583	1052	3	-0.4944	0.0082474	0.03614	0.694756	980	2	3.3572
CYB5R3	5	0.097129	0.20425	0.956611	4054	1	-2.9184	0.0082553	0.03614	0.694756	981	3	0.86049
C2orf57	5	0.48966	0.63986	1	11409	1	-1.3577	0.0082775	0.036141	0.694756	982	4	0.29655
ZNF880	5	0.062254	0.14514	0.866045	3141	3	-0.55353	0.0082962	0.036141	0.694756	983	2	3.3799
C17orf78	5	0.921	0.93268	1	16872	0	0	0.0083326	0.036141	0.694756	984	3	0.7511
GARS	5	0.95857	0.9605	1	17632	0	0	0.0083347	0.036141	0.694756	985	4	0.57843
MYOCD	5	0.90853	0.91888	1	16621	0	0	0.008342	0.036141	0.694756	986	4	0.30592
PNPO	5	0.50277	0.65278	1	11589	1	-1.2393	0.008345	0.036141	0.694756	987	2	3.2935
C2orf82	10	0.02608	0.086377	0.745492	1731	4	-0.99642	0.0083825	0.044039	0.774766	988	6	0.58218
AHCYL2	5	0.75851	0.80442	1	14275	1	-0.2314	0.0083876	0.036246	0.694756	989	4	0.76021
CABP2	5	0.76512	0.80577	1	14355	1	-0.36444	0.0083891	0.036246	0.694756	990	4	2.4845
ERMARD	5	0.66089	0.75184	1	13323	1	-1.4109	0.0084425	0.036289	0.694756	991	3	3.1282
FGD6	5	0.89782	0.90797	1	16395	0	0	0.0084527	0.036289	0.694756	992	4	0.41618
PDPR	5	0.88828	0.89889	1	16192	0	0	0.0084913	0.03638	0.694756	993	2	3.4538
MSL2	5	0.67595	0.75956	1	13457	1	-0.16156	0.0085241	0.03643	0.694756	994	4	0.58555
LRRC10B	4	0.60419	0.67442	1	12837	1	-0.48864	0.0085596	0.036356	0.694756	995	3	0.88657
WASF1	5	0.85563	0.86631	1	15603	1	-0.52002	0.0085746	0.036476	0.694756	996	3	0.85484
SRD5A1	5	0.80361	0.82499	1	14813	1	-0.16817	0.0085765	0.036518	0.694756	997	3	2.2285
SYNDIG1	4	0.99142	0.99249	1	18347	0	0	0.0085843	0.036356	0.694756	998	4	0.53983
C14orf166	5	0.98932	0.99015	1	18277	0	0	0.0085909	0.036518	0.694756	999	4	1.2535
ARMCX6	5	0.97198	0.97372	1	17904	0	0	0.0086376	0.036569	0.694756	1000	2	3.2776
TUBG1	3	0.99133	0.99271	1	18341	0	0	0.0086675	0.030037	0.669355	1001	3	0.65543
NPHS1	10	0.26056	0.51864	1	7880	2	-0.40816	0.008679	0.044478	0.781017	1002	6	0.67348
RPS19BP1	5	0.96054	0.96193	1	17670	0	0	0.0086886	0.036569	0.694756	1003	2	1.5557
ZNF185	5	0.9296	0.93861	1	17032	0	0	0.0087167	0.036569	0.694756	1004	4	0.61853
C14orf169	5	0.78276	0.81402	1	14546	1	-0.25522	0.0087839	0.03657	0.694756	1005	3	2.2727
AMIGO3	10	0.69371	0.86338	1	13618	2	-0.34103	0.0087901	0.044724	0.783567	1006	6	0.4218
PRB1	4	0.37262	0.51615	1	9608	2	-0.51628	0.0088297	0.03699	0.702025	1007	2	3.2068
CYP11A1	10	0.87479	0.94239	1	15948	2	-0.19153	0.0088531	0.044725	0.783567	1008	4	2.0152
IL3	5	0.7444	0.79437	1	14129	1	-0.21401	0.0088565	0.038937	0.728684	1009	3	0.47519
DAZAP1	5	0.79631	0.82042	1	14725	1	-0.24196	0.0088814	0.038937	0.728684	1010	3	2.4445
GALR3	5	0.76141	0.80534	1	14313	1	-0.20411	0.008902	0.038938	0.728684	1011	2	0.95978
KXD1	5	0.1277	0.25138	0.975476	4911	2	-0.25981	0.008913	0.038938	0.728684	1012	2	1.5342
MLLT10	5	0.98344	0.98437	1	18152	0	0	0.0089249	0.038938	0.728684	1013	3	0.58092
LSM1	5	0.85532	0.86631	1	15597	1	-0.11475	0.0089293	0.038938	0.728684	1014	4	0.42907
CCDC37	4	0.99106	0.99226	1	18331	0	0	0.0089387	0.037382	0.707323	1015	4	0.42486
CGB2	5	0.023037	0.057494	0.679944	1582	2	-0.54191	0.0089516	0.039025	0.729595	1016	2	3.5218
ENDOG	5	0.98205	0.98338	1	18122	0	0	0.0090502	0.039133	0.730161	1017	4	0.37519
OR5K2	5	0.35836	0.53277	1	9385	1	-0.44772	0.009058	0.039133	0.730161	1018	4	0.46066
DIRAS3	5	0.85595	0.86631	1	15610	1	-0.17822	0.009133	0.039222	0.731097	1019	4	0.46273
OR10Z1	5	0.84082	0.85392	1	15374	1	-0.20016	0.009218	0.039489	0.732444	1020	4	0.54727
RETN	5	0.41952	0.5777	1	10352	2	-0.32721	0.0092227	0.039489	0.732444	1021	2	2.0689
BBS4	5	0.98824	0.98924	1	18249	0	0	0.0092259	0.039489	0.732444	1022	4	0.48233
GNAZ	5	0.53381	0.68422	1	12084	1	-0.32231	0.0092351	0.039489	0.732444	1023	3	0.80342
ZCCHC11	5	0.94519	0.94916	1	17346	0	0	0.0092749	0.039586	0.732981	1024	4	1.0165
OR56A1	5	0.91221	0.92307	1	16687	0	0	0.0093306	0.041905	0.760135	1025	2	0.85897
WNT2	5	0.24388	0.43354	1	7638	1	-0.41202	0.0093337	0.041905	0.760135	1026	4	0.34212
CSRNP2	5	0.24866	0.43642	1	7702	1	-0.51519	0.0093896	0.041905	0.760135	1027	4	0.40767
ZNF800	5	0.93916	0.94569	1	17234	0	0	0.0094487	0.041905	0.760135	1028	4	0.32401
CCNDBP1	5	0.66743	0.75461	1	13375	1	-0.32615	0.0094634	0.041955	0.760135	1029	4	0.52209
TGOLN2	5	0.67067	0.75775	1	13411	1	-0.1816	0.0094682	0.041956	0.760135	1030	4	0.38936
ZMAT3	5	0.91918	0.92934	1	16846	0	0	0.0095395	0.042006	0.760135	1031	4	1.6314
HGS	5	0.96707	0.9686	1	17795	0	0	0.0095569	0.042007	0.760135	1032	4	0.82433
ACTA2	10	0.12874	0.30749	1	4934	2	-0.55198	0.0095737	0.045669	0.786579	1033	6	1.2993
MYH6	10	0.66197	0.84535	1	13339	2	-0.27142	0.0095836	0.045719	0.786579	1034	3	2.3762
NKX3-2	5	0.55103	0.70105	1	12349	2	-0.14111	0.0096081	0.042065	0.760135	1035	2	0.835
STK38	5	0.78228	0.81265	1	14541	1	-0.21379	0.0096366	0.042117	0.760135	1036	4	0.4298
PIGO	5	0.80167	0.82456	1	14791	1	-0.18886	0.0096454	0.042117	0.760135	1037	3	0.52107
ZADH2	5	0.92032	0.93149	1	16865	0	0	0.0096481	0.042117	0.760135	1038	3	0.565
PRDM10	5	0.4959	0.64549	1	11498	2	-0.21622	0.0096737	0.042118	0.760135	1039	3	0.72446
SOCS3	5	0.2867	0.46621	1	8263	2	-0.3809	0.0096738	0.042118	0.760135	1040	2	2.0251
TMEM194B	5	0.28096	0.4623	1	8188	2	-0.38205	0.0096738	0.042118	0.760135	1041	2	2.8584
PHLPP2	5	0.80408	0.82544	1	14820	1	-0.23764	0.00971	0.042165	0.760135	1042	3	1.43
NFXL1	5	0.77045	0.80714	1	14406	1	-0.41023	0.009734	0.042165	0.760135	1043	3	0.74579
RBM38	5	0.67425	0.75913	1	13441	1	-0.19123	0.0097383	0.042166	0.760135	1044	3	0.50313
ATP6V0D2	5	0.96776	0.9691	1	17805	0	0	0.0097588	0.042166	0.760135	1045	2	3.3037
SAP30L	5	0.33379	0.50406	1	9001	2	-0.22421	0.0098075	0.042277	0.760135	1046	2	3.3656
RAPGEF2	5	0.21599	0.40073	1	7101	1	-0.42838	0.0098109	0.042277	0.760135	1047	4	0.45518
WDR47	5	0.030965	0.074865	0.72657	1960	1	-0.95248	0.0098187	0.042277	0.760135	1048	4	0.73395
EYA1	10	0.62817	0.82548	1	13028	3	-0.23544	0.0098536	0.046765	0.786579	1049	7	0.46249
CDH3	5	0.71063	0.77241	1	13791	1	-0.26365	0.0098562	0.042278	0.760135	1050	1	5.9705
FBXO44	5	0.85422	0.86541	1	15583	1	-0.13122	0.0098664	0.042278	0.760135	1051	3	0.61551
MAPK11	5	0.86641	0.8758	1	15811	1	-0.12408	0.0099474	0.042685	0.760135	1052	3	0.62216
ACOT12	5	0.83646	0.84849	1	15300	1	-0.27265	0.0099807	0.042685	0.760135	1053	4	0.43988
ARF4	5	0.9392	0.94569	1	17236	0	0	0.0099849	0.042685	0.760135	1054	4	0.5005
YTHDF2	5	0.66733	0.75461	1	13372	1	-0.37002	0.01	0.042685	0.760135	1055	4	0.78407
OAS3	5	0.15027	0.28876	0.994898	5450	2	-0.2644	0.010011	0.042685	0.760135	1056	2	3.0442
MT3	5	0.033261	0.080228	0.740248	2056	2	-0.56027	0.010027	0.042686	0.760135	1057	3	2.1241
STEAP4	5	0.6449	0.7428	1	13168	1	-0.44787	0.010027	0.042686	0.760135	1058	3	2.284
FUS	5	0.97022	0.9724	1	17864	0	0	0.010033	0.042686	0.760135	1059	4	0.53966
ELP6	5	0.40796	0.56525	1	10172	1	-0.43457	0.010089	0.042686	0.760135	1060	4	0.64803
FAM89A	5	0.23965	0.42715	1	7573	1	-3.1793	0.010091	0.042686	0.760135	1061	4	0.64083
FHOD1	5	0.6023	0.72977	1	12824	1	-0.28246	0.010122	0.042802	0.760135	1062	3	0.60242
SNTA1	5	0.77837	0.81034	1	14496	1	-0.16833	0.010151	0.042803	0.760135	1063	4	0.49542
DGCR6	5	0.38311	0.54484	1	9794	1	-1.1603	0.010152	0.042803	0.760135	1064	3	0.61327
MARK1	5	0.31375	0.48792	1	8678	2	-0.32454	0.010158	0.042803	0.760135	1065	3	0.63856
RHOC	5	0.26047	0.4462	1	7877	2	-0.4092	0.010246	0.043043	0.761533	1066	3	2.2497
TAPBP	5	0.11792	0.23763	0.97123	4622	2	-0.30766	0.010267	0.043044	0.761533	1067	3	0.5237
DYNLL1	5	0.83639	0.84849	1	15299	1	-0.34115	0.010325	0.043169	0.763033	1068	4	0.86983
SMARCA4	5	0.25134	0.44123	1	7740	2	-0.47118	0.010382	0.043619	0.768827	1069	3	0.56736
SLC35E2B	5	0.8179	0.83406	1	15011	1	-0.82824	0.010412	0.04362	0.768827	1070	3	0.79279
NOD2	5	0.76817	0.80714	1	14386	1	-0.24281	0.010428	0.04379	0.771103	1071	3	0.54337
HECW2	5	0.91245	0.92338	1	16695	0	0	0.010451	0.046097	0.786579	1072	4	0.49069
KIAA0368	5	0.95577	0.95823	1	17579	0	0	0.010458	0.046097	0.786579	1073	4	0.49352
SERPINB5	5	0.46957	0.6183	1	11090	2	-0.27812	0.010489	0.046097	0.786579	1074	2	3.2992
MAPK9	5	0.35089	0.52669	1	9258	1	-0.30344	0.01052	0.046097	0.786579	1075	3	0.40436
ZSWIM8	5	0.53546	0.68587	1	12109	1	-1.1266	0.010523	0.046097	0.786579	1076	3	0.70521
BHMT2	5	0.010684	0.027745	0.544146	962	2	-0.69233	0.010561	0.04622	0.786579	1077	3	0.66778
GPR18	5	0.7138	0.77519	1	13817	1	-0.43502	0.010565	0.04622	0.786579	1078	2	0.56993
ACAD11	5	0.49802	0.64608	1	11526	2	-0.22799	0.010566	0.04622	0.786579	1079	3	0.56131
PRMT8	5	0.91333	0.92507	1	16714	0	0	0.010569	0.04622	0.786579	1080	3	0.60239
UCHL1	10	0.52561	0.76597	1	11946	1	-0.32826	0.010596	0.047872	0.786579	1081	7	0.30947
RNF185	5	0.90956	0.91954	1	16637	0	0	0.010605	0.046221	0.786579	1082	4	0.42669
PPY	5	0.82847	0.84085	1	15186	1	-0.36628	0.010611	0.046221	0.786579	1083	2	3.116
TSTD2	5	0.54696	0.69731	1	12289	2	-0.26376	0.010611	0.046221	0.786579	1084	2	3.2716
RASGRF1	5	0.38379	0.54582	1	9805	2	-0.31812	0.01063	0.046286	0.786579	1085	2	0.97875
C10orf11	5	0.72211	0.77842	1	13884	1	-0.23362	0.010642	0.046286	0.786579	1086	4	0.6423
LOR	5	0.92831	0.93807	1	17013	0	0	0.010642	0.046286	0.786579	1087	3	1.7141
GPIHBP1	5	0.22489	0.41552	1	7302	1	-0.90925	0.010648	0.046286	0.786579	1088	2	0.66743
TMEM39B	5	0.31437	0.48792	1	8688	2	-0.41775	0.01067	0.046287	0.786579	1089	3	0.72014
DCAF4L1	5	0.72015	0.77797	1	13868	1	-0.18994	0.010682	0.046287	0.786579	1090	4	0.51296
MERTK	5	0.93679	0.94383	1	17194	0	0	0.010722	0.046543	0.786579	1091	4	0.39774
OR13C8	5	0.50893	0.65895	1	11680	2	-0.21043	0.010732	0.046596	0.786579	1092	3	0.7446
PCOLCE	5	0.46898	0.61768	1	11080	2	-0.15179	0.010733	0.046596	0.786579	1093	2	3.2892
NRTN	5	0.90975	0.91954	1	16641	0	0	0.010798	0.046651	0.786579	1094	4	0.34064
C1orf52	5	0.7279	0.78155	1	13942	1	-0.32657	0.010846	0.04671	0.786579	1095	3	0.56678
POLR2J2	5	0.15655	0.29659	1	5599	2	-0.34889	0.010879	0.04671	0.786579	1096	2	3.1829
TENM2	4	0.9891	0.99077	1	18271	0	0	0.010898	0.044137	0.775764	1097	4	0.60852
CTNNA2	5	0.90202	0.91184	1	16478	0	0	0.010928	0.046711	0.786579	1098	3	1.3119
TMEM65	5	0.19367	0.36307	1	6557	2	-0.37961	0.010935	0.046711	0.786579	1099	3	0.57972
PNMA2	5	0.35183	0.52669	1	9274	1	-0.65053	0.010952	0.046711	0.786579	1100	4	0.58258
RTP2	5	0.98758	0.98866	1	18234	0	0	0.010961	0.046711	0.786579	1101	4	0.62696
WDR6	5	0.98809	0.98917	1	18243	0	0	0.010964	0.046711	0.786579	1102	4	0.46076
CKM	10	0.90224	0.95803	1	16483	1	-0.18807	0.010967	0.052757	0.819915	1103	6	0.40364
BATF2	5	0.9636	0.96528	1	17744	0	0	0.010974	0.046711	0.786579	1104	4	0.5219
C20orf203	5	0.50381	0.65278	1	11602	1	-0.38521	0.010976	0.046711	0.786579	1105	2	3.0997
SPATA24	5	0.7348	0.78429	1	14014	1	-0.21166	0.010985	0.046711	0.786579	1106	4	0.51692
ZNF652	5	0.79211	0.81719	1	14684	1	-0.12565	0.010996	0.046711	0.786579	1107	4	0.2786
BCAM	5	0.84702	0.85759	1	15472	1	-0.12701	0.011074	0.046893	0.786579	1108	1	6.2024
PLCH2	10	0.26026	0.51819	1	7872	2	-0.44206	0.011108	0.057399	0.8512	1109	7	0.36649
STX2	5	0.94548	0.94963	1	17351	0	0	0.011122	0.046949	0.786579	1110	4	1.624
DBF4B	5	0.50693	0.65728	1	11654	2	-0.26084	0.011126	0.046949	0.786579	1111	3	1.4012
CAPRIN2	5	0.2683	0.45324	1	7998	2	-0.41324	0.011169	0.047084	0.786579	1112	3	0.94839
CHGA	5	0.95485	0.95697	1	17559	0	0	0.011171	0.047202	0.786579	1113	4	1.7261
TXNDC9	5	0.83092	0.84219	1	15227	1	-0.31489	0.011181	0.047202	0.786579	1114	2	1.5449
LRCH2	5	0.88028	0.89052	1	16037	1	-0.12971	0.011196	0.047202	0.786579	1115	3	0.51148
MAGEB5	9	0.27431	0.51298	1	8084	2	-0.8129	0.011222	0.059014	0.857554	1116	7	0.26078
TBC1D9B	5	0.86362	0.87259	1	15762	1	-0.1177	0.01123	0.047267	0.786579	1117	4	0.47992
PRKRIR	5	0.36392	0.53818	1	9466	1	-0.49	0.011248	0.047316	0.786579	1118	3	0.69514
DNPEP	5	0.94239	0.94843	1	17300	0	0	0.011279	0.04744	0.786579	1119	3	0.63768
TRIM68	5	0.6982	0.76883	1	13666	1	-0.44631	0.011287	0.04744	0.786579	1120	4	0.5657
TCEAL5	5	0.89068	0.90106	1	16235	0	0	0.011293	0.04744	0.786579	1121	2	3.0833
ARHGAP30	5	0.68359	0.76462	1	13524	1	-0.25019	0.011334	0.047575	0.786579	1122	4	0.51828
STXBP2	5	0.88645	0.89628	1	16154	0	0	0.011346	0.047718	0.786579	1123	4	0.56344
OR52E6	5	0.078805	0.16841	0.887821	3599	3	-0.48965	0.011353	0.047718	0.786579	1124	2	0.97383
ZBTB33	5	0.99126	0.99197	1	18339	0	0	0.011366	0.047718	0.786579	1125	4	1.6701
WDR78	5	0.31126	0.48585	1	8635	2	-0.29023	0.011414	0.047718	0.786579	1126	2	3.221
KIF4A	5	0.98419	0.98521	1	18167	0	0	0.011417	0.047718	0.786579	1127	3	0.73942
SPRED1	4	0.87318	0.888	1	15918	0	0	0.011433	0.044748	0.783567	1128	3	0.76926
TRPV1	5	0.95602	0.95823	1	17583	0	0	0.011445	0.047718	0.786579	1129	4	0.74404
SMYD4	5	0.18048	0.34035	1	6231	1	-1.9837	0.011482	0.04778	0.786579	1130	4	0.8102
KCNRG	5	0.98277	0.98389	1	18140	0	0	0.011509	0.047781	0.786579	1131	4	0.36214
RAMP1	5	0.94379	0.94916	1	17326	0	0	0.011532	0.04791	0.786579	1132	3	0.44784
PPHLN1	5	0.039506	0.09448	0.769672	2306	1	-0.85722	0.011537	0.04791	0.786579	1133	4	1.4785
NOP14	5	0.83793	0.85121	1	15330	1	-0.37743	0.011551	0.04791	0.786579	1134	2	0.72004
RXRA	5	0.64016	0.74145	1	13121	1	-0.49247	0.01156	0.04797	0.786579	1135	3	2.258
GPR107	5	0.049922	0.11881	0.813228	2751	2	-0.44545	0.011586	0.04797	0.786579	1136	3	0.48073
DLAT	4	0.74713	0.76374	1	14156	1	-0.21851	0.011598	0.044859	0.784773	1137	2	2.9031
GH2	5	0.73984	0.78886	1	14071	1	-0.26097	0.011607	0.04797	0.786579	1138	3	1.0712
WBP11	10	0.15605	0.35281	1	5590	4	-0.93587	0.011609	0.063604	0.869522	1139	6	0.99274
AKNA	10	0.23152	0.48757	1	7439	4	-0.25764	0.011619	0.063605	0.869522	1140	5	0.4596
ATAT1	5	0.94128	0.94745	1	17278	0	0	0.011647	0.048106	0.786579	1141	4	0.69419
FEM1C	5	0.74565	0.79578	1	14144	1	-1.0012	0.011693	0.048294	0.786579	1142	4	0.37462
VGLL1	5	0.9286	0.93834	1	17019	0	0	0.011706	0.048294	0.786579	1143	3	2.1162
SIPA1L3	4	0.96976	0.97174	1	17849	0	0	0.011724	0.045186	0.786579	1144	2	0.6324
DHX9	5	0.53517	0.68539	1	12106	2	-0.24079	0.011725	0.048368	0.786579	1145	3	0.60541
LAGE3	5	0.97939	0.98079	1	18062	0	0	0.011726	0.048368	0.786579	1146	4	0.63314
IVL	5	0.57793	0.72021	1	12631	1	-0.41256	0.011739	0.048368	0.786579	1147	4	0.38033
C19orf18	5	0.96093	0.9627	1	17684	0	0	0.011746	0.048368	0.786579	1148	4	0.56531
LAMTOR2	5	0.67303	0.75913	1	13430	1	-0.31862	0.011755	0.048368	0.786579	1149	4	1.8425
BARX2	5	0.82929	0.84129	1	15200	1	-0.15085	0.011757	0.048368	0.786579	1150	3	0.56644
UBL4A	5	0.96484	0.96637	1	17764	0	0	0.011782	0.048369	0.786579	1151	3	0.55294
PRDX4	5	0.92305	0.93393	1	16910	0	0	0.011789	0.048369	0.786579	1152	4	0.49412
ARL15	5	0.20973	0.39022	1	6954	3	-0.33423	0.011804	0.048369	0.786579	1153	1	6.1389
KCNN1	5	0.37256	0.54092	1	9606	2	-0.17852	0.011838	0.04844	0.786579	1154	2	0.77232
ZNF202	5	0.88924	0.89974	1	16206	0	0	0.011844	0.04844	0.786579	1155	2	0.92188
HDAC7	5	0.85406	0.86494	1	15582	1	-0.39248	0.011852	0.04844	0.786579	1156	3	2.2085
VHL	5	0.77552	0.80853	1	14465	1	-0.20777	0.011863	0.048502	0.786579	1157	3	0.65198
UBXN6	10	0.98342	0.98589	1	18151	1	-0.11679	0.011869	0.064214	0.869522	1158	6	1.4419
ACTG1	5	0.96618	0.9681	1	17776	0	0	0.011874	0.048585	0.786579	1159	3	0.56224
RHCG	5	0.92069	0.9318	1	16868	0	0	0.011895	0.048645	0.786579	1160	3	0.67655
UBE2Z	5	0.092322	0.19643	0.945139	3951	1	-0.59986	0.011899	0.048645	0.786579	1161	4	0.4495
ETV7	5	0.84125	0.85392	1	15382	1	-0.19466	0.011901	0.048645	0.786579	1162	1	6.1013
AKR1E2	5	0.15134	0.28919	0.994898	5477	3	-0.27793	0.01192	0.048646	0.786579	1163	2	1.6729
TGIF1	5	0.70256	0.77064	1	13711	1	-0.15716	0.011964	0.04883	0.788358	1164	3	0.61268
PIR	5	0.98645	0.98755	1	18210	0	0	0.011988	0.048899	0.788358	1165	4	0.33751
PAAF1	5	0.9353	0.94327	1	17156	0	0	0.011998	0.048899	0.788358	1166	2	3.3465
ACOX3	10	0.36906	0.63543	1	9553	4	-0.24293	0.012017	0.064599	0.869522	1167	4	0.81018
GSX1	5	0.50591	0.65619	1	11633	1	-0.24833	0.012034	0.049175	0.788358	1168	4	0.37147
RRAS	5	0.70019	0.76927	1	13691	1	-0.83157	0.012047	0.049175	0.788358	1169	3	1.7355
NR6A1	5	0.9596	0.96155	1	17652	0	0	0.01205	0.049175	0.788358	1170	4	0.39378
RBBP7	5	0.50867	0.65895	1	11673	1	-0.36371	0.012072	0.049175	0.788358	1171	3	0.58331
HIPK3	10	0.79212	0.90933	1	14686	2	-0.34572	0.012106	0.064655	0.869522	1172	7	0.46363
C11orf71	5	0.77171	0.80714	1	14415	1	-0.27909	0.012136	0.049175	0.788358	1173	4	0.32883
SKP1	5	0.14823	0.28349	0.994898	5399	2	-0.77791	0.012142	0.049175	0.788358	1174	3	0.92309
SIN3B	5	0.67371	0.75913	1	13435	1	-0.4012	0.012145	0.049175	0.788358	1175	4	0.38386
GSC2	5	0.14222	0.27679	0.994898	5259	1	-0.3457	0.012219	0.049416	0.788853	1176	4	0.78924
ROGDI	5	0.069833	0.15549	0.879568	3342	1	-0.7849	0.012237	0.049416	0.788853	1177	4	0.81702
NR1I2	5	0.97313	0.97518	1	17926	0	0	0.01224	0.049416	0.788853	1178	4	0.41817
CLEC18B	5	0.87752	0.88777	1	15984	1	-0.16758	0.012241	0.049416	0.788853	1179	2	3.277
SSSCA1	5	0.98305	0.98398	1	18146	0	0	0.012244	0.049416	0.788853	1180	4	0.39597
AP2B1	5	0.88262	0.8919	1	16089	0	0	0.012252	0.049469	0.789032	1181	4	0.50429
BLOC1S3	10	0.74403	0.89479	1	14125	1	-0.33465	0.012263	0.064849	0.869522	1182	7	0.44306
CSAG3	7	0.21286	0.41631	1	7031	1	-0.57609	0.012283	0.055322	0.84645	1183	6	0.38548
SPARC	5	0.10654	0.22027	0.969464	4298	3	-0.30525	0.01229	0.049552	0.789673	1184	1	6.0888
ZIC5	5	0.067211	0.15126	0.871446	3277	3	-0.29755	0.012338	0.049767	0.792192	1185	1	6.0224
CIDEB	10	0.084189	0.22799	0.97123	3750	4	-0.33453	0.012355	0.065386	0.869522	1186	4	1.9669
ASTN2	5	0.68626	0.76555	1	13545	1	-0.30912	0.012372	0.049836	0.792192	1187	4	0.36345
C3orf27	5	0.97513	0.97616	1	17971	0	0	0.012387	0.049836	0.792192	1188	4	0.48794
TAOK1	5	0.063001	0.14621	0.866045	3162	1	-1.2474	0.012397	0.049912	0.792728	1189	4	0.42409
ZNF649	5	0.076347	0.16463	0.887663	3522	3	-0.30186	0.012436	0.050056	0.79435	1190	1	6.0155
MBTD1	5	0.7979	0.82226	1	14743	1	-0.12363	0.012453	0.050126	0.794782	1191	3	2.1955
COPA	4	0.54145	0.63698	1	12199	1	-0.58592	0.012484	0.0504	0.797789	1192	3	2.2277
JRKL	5	0.28505	0.46579	1	8244	1	-0.44212	0.012491	0.052357	0.819915	1193	4	0.36417
RNASEH1	5	0.6783	0.7605	1	13475	1	-1.0682	0.012529	0.052358	0.819915	1194	4	0.46273
VTA1	5	0.020142	0.050702	0.676838	1416	1	-1.1474	0.012531	0.052358	0.819915	1195	4	0.50408
MYOG	5	0.98849	0.98953	1	18254	0	0	0.012532	0.052358	0.819915	1196	4	0.36387
OR2V2	4	0.98746	0.98906	1	18231	0	0	0.012536	0.050401	0.797789	1197	4	0.2158
ZNF592	5	0.98229	0.98359	1	18126	0	0	0.012584	0.05252	0.819915	1198	4	0.21819
FKBPL	5	0.9755	0.9767	1	17983	0	0	0.012589	0.05252	0.819915	1199	3	0.46144
TXNL1	5	0.98938	0.99027	1	18283	0	0	0.012611	0.05252	0.819915	1200	4	0.46691
TXNIP	10	0.99475	0.99613	1	18453	0	0	0.012648	0.065876	0.869522	1201	7	0.54628
AMMECR1	5	0.97191	0.97372	1	17902	0	0	0.012674	0.052663	0.819915	1202	3	0.58755
ACBD4	9	0.35335	0.61342	1	9297	2	-0.3963	0.012685	0.066526	0.869522	1203	7	0.64587
SCGB2B2	5	0.91936	0.92964	1	16850	0	0	0.012694	0.052663	0.819915	1204	4	0.70952
ZNF444	5	0.68523	0.76507	1	13539	1	-0.30577	0.012703	0.052663	0.819915	1205	3	2.1528
HES5	5	0.39746	0.55829	1	10026	1	-0.38129	0.012703	0.052663	0.819915	1206	3	2.138
FRA10AC1	4	0.037273	0.077793	0.734497	2224	3	-0.69074	0.012727	0.050795	0.80336	1207	1	5.8548
CKMT2	5	0.95262	0.95572	1	17511	0	0	0.012739	0.052664	0.819915	1208	4	0.45375
POGLUT1	5	0.21801	0.40372	1	7151	1	-0.40032	0.012754	0.052739	0.819915	1209	3	0.58929
ABL2	10	0.6488	0.83754	1	13199	3	-0.24035	0.012803	0.066278	0.869522	1210	7	0.39718
MRC2	5	0.80075	0.82411	1	14783	1	-0.15181	0.012825	0.052883	0.819915	1211	3	1.3064
KRTAP5-1	5	0.55432	0.70438	1	12388	1	-0.21016	0.01284	0.052884	0.819915	1212	4	1.4571
C15orf43	5	0.76945	0.80714	1	14395	1	-0.25516	0.012856	0.052884	0.819915	1213	2	1.3512
TNFSF12	5	0.83203	0.84219	1	15241	1	-0.28045	0.012896	0.05296	0.819915	1214	3	0.59096
RWDD2B	5	0.9332	0.94111	1	17111	0	0	0.012904	0.05296	0.819915	1215	4	0.33579
MAGEF1	5	0.11718	0.23492	0.97123	4605	2	-0.80594	0.012922	0.05296	0.819915	1216	2	0.83642
BAG6	4	0.21122	0.34812	1	6994	2	-0.47006	0.012936	0.052938	0.819915	1217	2	1.4059
PLTP	10	0.98329	0.9858	1	18149	1	-0.12865	0.012971	0.066336	0.869522	1218	6	0.38258
A3GALT2	5	0.36581	0.53867	1	9500	2	-0.93334	0.012995	0.053033	0.819915	1219	2	3.4179
APOA1BP	5	0.92315	0.93393	1	16912	0	0	0.013025	0.053033	0.819915	1220	3	0.91719
HSD17B3	5	0.85173	0.86304	1	15535	1	-0.12831	0.013035	0.053033	0.819915	1221	4	0.36825
MTRNR2L6	5	0.43992	0.59087	1	10652	1	-2.0382	0.013074	0.053107	0.819915	1222	4	1.5786
SERPINA3	10	0.21306	0.46026	1	7037	2	-0.38825	0.013081	0.066403	0.869522	1223	5	0.42269
PREX1	5	0.66594	0.75415	1	13362	1	-0.21492	0.013115	0.053107	0.819915	1224	4	0.30966
HCK	5	0.054814	0.13136	0.842353	2916	1	-1.2922	0.013122	0.053107	0.819915	1225	4	0.54004
HSD17B13	5	0.42067	0.57835	1	10369	2	-0.58016	0.013143	0.053107	0.819915	1226	3	0.48176
C8orf58	5	0.34709	0.52395	1	9203	2	-0.34638	0.013165	0.053107	0.819915	1227	2	0.77158
DEFB114	5	0.97528	0.97629	1	17974	0	0	0.013239	0.053253	0.821485	1228	4	0.30971
DDX27	5	0.8095	0.82815	1	14892	1	-0.64978	0.013251	0.0534	0.821738	1229	2	1.4229
OR5W2	5	0.84335	0.85576	1	15418	1	-0.28317	0.013271	0.0534	0.821738	1230	3	0.6238
F8A2	5	0.64219	0.7419	1	13143	1	-0.66805	0.013324	0.053616	0.824039	1231	4	0.51008
NCKAP1L	5	0.78834	0.81628	1	14620	1	-0.25988	0.013384	0.053769	0.824039	1232	3	1.9135
ATP5G3	5	0.26312	0.45149	1	7919	1	-1.2687	0.013403	0.053769	0.824039	1233	3	0.9733
FAM184B	5	0.95037	0.95391	1	17453	0	0	0.013417	0.053769	0.824039	1234	4	0.54486
INTS12	5	0.88752	0.89763	1	16169	0	0	0.013422	0.053769	0.824039	1235	4	0.64802
SLC25A1	5	0.95727	0.95928	1	17600	0	0	0.013449	0.053925	0.825748	1236	4	0.48633
FMNL1	5	0.84615	0.85759	1	15460	1	-0.17187	0.0135	0.056258	0.8512	1237	4	0.43236
BRK1	5	0.42812	0.58387	1	10469	1	-0.2744	0.013513	0.056258	0.8512	1238	4	0.43801
ZNF554	5	0.22676	0.41805	1	7340	2	-0.20901	0.013537	0.056258	0.8512	1239	3	0.99027
MGEA5	5	0.50629	0.65673	1	11646	2	-0.27581	0.013543	0.056258	0.8512	1240	3	0.68334
RPL7	5	0.87562	0.8864	1	15961	1	-0.12983	0.013557	0.056328	0.8512	1241	3	0.94388
P2RX4	5	0.96921	0.97056	1	17839	0	0	0.013581	0.056328	0.8512	1242	4	0.39214
RAPGEFL1	5	0.27177	0.4554	1	8054	1	-0.40748	0.013657	0.056328	0.8512	1243	2	0.64098
VANGL1	5	0.68346	0.76417	1	13522	1	-0.6921	0.013692	0.056328	0.8512	1244	4	0.62267
ZNF628	5	0.12001	0.24291	0.97123	4678	3	-0.31165	0.013699	0.05641	0.8512	1245	1	5.9916
HOXC5	5	0.057299	0.13805	0.854472	2994	1	-0.61178	0.013711	0.05641	0.8512	1246	3	0.39361
CSNK1E	5	0.79016	0.81676	1	14657	1	-0.20094	0.013715	0.056411	0.8512	1247	4	0.32798
OVGP1	10	0.080189	0.21816	0.969464	3634	3	-1.1096	0.013729	0.072093	0.869522	1248	5	0.47682
RTF1	5	0.20077	0.37748	1	6715	2	-1.2955	0.013738	0.056488	0.8512	1249	2	2.102
USP48	5	0.0052437	0.0152	0.414498	690	3	-0.74984	0.013796	0.056564	0.8512	1250	2	2.9092
FLOT2	5	0.98683	0.98779	1	18219	0	0	0.013796	0.056564	0.8512	1251	3	2.0705
ANKHD1	5	0.81522	0.83224	1	14968	1	-0.12625	0.013825	0.056717	0.8512	1252	4	0.19703
CCSER2	5	0.39618	0.55778	1	10000	2	-0.30844	0.013827	0.056717	0.8512	1253	3	0.71577
MAP3K19	5	0.61218	0.73381	1	12898	1	-0.76204	0.013846	0.056866	0.8512	1254	4	0.64355
MICB	10	0.72907	0.88968	1	13957	2	-0.2707	0.013848	0.072295	0.869522	1255	7	0.68887
RPS15	5	0.9513	0.95482	1	17477	0	0	0.013854	0.056866	0.8512	1256	4	0.83366
LYPLAL1	5	0.80483	0.82544	1	14833	1	-0.43908	0.013909	0.057015	0.8512	1257	4	0.42961
FAM129A	5	0.91825	0.92804	1	16824	0	0	0.013927	0.057015	0.8512	1258	3	0.5989
C18orf54	5	0.75911	0.80442	1	14287	1	-0.19062	0.013933	0.057015	0.8512	1259	3	0.65276
PPP1R7	5	0.72475	0.77974	1	13914	1	-0.16646	0.013947	0.057016	0.8512	1260	4	0.33628
C14orf178	5	0.91223	0.92307	1	16689	0	0	0.013988	0.057079	0.8512	1261	4	0.50882
OR11L1	5	0.61893	0.73517	1	12955	1	-1.5212	0.013991	0.05708	0.8512	1262	3	2.0999
LDHAL6B	5	0.95117	0.95461	1	17474	0	0	0.013996	0.057159	0.8512	1263	4	0.49331
PRKACB	5	0.66026	0.75184	1	13316	1	-0.45742	0.014042	0.057307	0.8512	1264	3	0.83692
TMEM175	5	0.83705	0.84985	1	15309	1	-0.19485	0.014059	0.057307	0.8512	1265	4	0.48972
MDM2	5	0.87429	0.88502	1	15939	1	-0.41336	0.014069	0.057307	0.8512	1266	4	0.40582
LRRC3C	5	0.52305	0.6743	1	11908	2	-0.29879	0.014088	0.057307	0.8512	1267	3	2.2042
B3GNTL1	10	0.018553	0.065902	0.706649	1338	4	-0.40256	0.014123	0.072789	0.869522	1268	5	0.52716
SYCP1	5	0.95136	0.95482	1	17479	0	0	0.014138	0.057308	0.8512	1269	3	0.80758
SLC38A3	5	0.86211	0.87084	1	15726	1	-0.084839	0.014147	0.057308	0.8512	1270	3	0.57689
SRR	5	0.97935	0.98079	1	18058	0	0	0.01418	0.057308	0.8512	1271	4	0.46274
COL27A1	5	0.020528	0.051704	0.676838	1435	3	-0.79939	0.014185	0.057308	0.8512	1272	1	5.9108
IGLL1	5	0.89358	0.90311	1	16303	0	0	0.01419	0.057308	0.8512	1273	4	0.6086
SLC27A6	5	0.40139	0.56145	1	10092	2	-0.18066	0.014209	0.05739	0.8512	1274	3	0.56942
SECTM1	5	0.98935	0.99021	1	18279	0	0	0.014216	0.05739	0.8512	1275	4	0.5792
LAIR1	5	0.78879	0.81628	1	14627	1	-0.35533	0.014233	0.057486	0.851817	1276	3	2.367
ZSCAN16	5	0.88575	0.89454	1	16143	0	0	0.014282	0.0577	0.853463	1277	4	0.91563
RNF44	5	0.98813	0.98917	1	18245	0	0	0.014296	0.057701	0.853463	1278	4	0.33149
GIMAP7	5	0.21154	0.39408	1	7003	2	-0.33168	0.01433	0.057869	0.853463	1279	1	5.7172
SPEF1	5	0.97577	0.97734	1	17987	0	0	0.014336	0.057869	0.853463	1280	4	0.83502
ADC	5	0.57301	0.71649	1	12606	1	-0.39925	0.014356	0.057869	0.853463	1281	4	0.58668
PEX26	5	0.23639	0.42431	1	7521	2	-0.53508	0.014398	0.05787	0.853463	1282	3	0.5734
SCGB1D4	5	0.96132	0.9627	1	17694	0	0	0.014418	0.058018	0.853759	1283	2	0.81992
GGNBP2	5	0.98263	0.98389	1	18134	0	0	0.014512	0.058186	0.853759	1284	4	0.45457
UBL4B	5	0.79006	0.81676	1	14656	1	-0.18215	0.014525	0.058364	0.853759	1285	3	2.0833
ANKRD10	5	0.85516	0.86586	1	15595	1	-0.094359	0.014563	0.058594	0.853759	1286	3	0.32269
WWC3	5	0.84605	0.85759	1	15457	1	-0.18008	0.014598	0.058594	0.853759	1287	4	0.58513
CAPG	9	0.84137	0.92195	1	15386	2	-0.45191	0.01461	0.071267	0.869522	1288	5	0.49393
SCRN1	5	0.97534	0.97642	1	17976	0	0	0.014648	0.058662	0.853759	1289	3	0.42195
PAQR3	5	0.12707	0.25138	0.975476	4895	2	-0.45984	0.01467	0.058662	0.853759	1290	1	5.9448
CRHR2	5	0.37846	0.54361	1	9704	1	-0.5981	0.014674	0.058662	0.853759	1291	4	0.34743
SLC22A16	5	0.22291	0.41342	1	7269	2	-0.38911	0.014678	0.058662	0.853759	1292	3	0.66946
MPC1	5	0.75153	0.7989	1	14207	1	-0.31848	0.014687	0.058662	0.853759	1293	4	0.29954
NKAIN3	4	0.98528	0.98673	1	18193	0	0	0.014715	0.060071	0.869522	1294	4	0.34587
ADRM1	5	0.16231	0.30671	1	5736	3	-0.21691	0.014722	0.058662	0.853759	1295	2	0.98746
MRPS27	5	0.33034	0.49994	1	8934	2	-0.56673	0.014743	0.058662	0.853759	1296	1	5.8766
PADI1	5	0.90051	0.9107	1	16446	0	0	0.014743	0.058662	0.853759	1297	4	1.7052
CDKN2B	5	0.36413	0.53867	1	9470	1	-0.25527	0.014758	0.058662	0.853759	1298	4	0.5156
DPH3	5	0.82779	0.83995	1	15177	1	-0.16056	0.01478	0.058662	0.853759	1299	4	0.63634
ITSN1	5	0.98724	0.98836	1	18227	0	0	0.014782	0.058662	0.853759	1300	4	0.52265
CD44	5	0.93085	0.93944	1	17064	0	0	0.014785	0.058662	0.853759	1301	4	0.62898
B4GALT4	5	0.081821	0.17355	0.898544	3673	1	-0.66523	0.014815	0.058813	0.85529	1302	4	0.30789
PPIA	5	0.70306	0.77109	1	13714	1	-0.3221	0.014866	0.061199	0.869522	1303	3	0.51949
MFI2	10	0.51976	0.76219	1	11851	2	-0.69862	0.014877	0.074076	0.869522	1304	4	2.0089
TMEM88B	4	0.9851	0.98648	1	18189	0	0	0.014897	0.0606	0.869522	1305	4	0.29054
DHRS9	5	0.95408	0.95697	1	17544	0	0	0.014964	0.061351	0.869522	1306	4	0.6992
CEND1	10	0.68443	0.85664	1	13531	3	-0.21621	0.014974	0.074402	0.869522	1307	4	1.9611
SLC9A3R2	10	0.21771	0.46737	1	7142	3	-0.43118	0.014994	0.074403	0.869522	1308	6	0.45869
MLEC	10	0.52931	0.76792	1	12009	2	-0.40498	0.015003	0.074403	0.869522	1309	6	0.38188
CLGN	5	0.98937	0.99027	1	18281	0	0	0.015004	0.061352	0.869522	1310	4	0.48505
TERT	5	0.20076	0.37704	1	6714	2	-0.58199	0.01501	0.061352	0.869522	1311	2	1.9776
TAS2R1	5	0.51489	0.66389	1	11769	1	-0.55715	0.015022	0.061352	0.869522	1312	2	0.81302
GBAS	5	0.77477	0.80853	1	14455	1	-0.41076	0.015058	0.061434	0.869522	1313	2	1.8234
DHDH	5	0.93711	0.94383	1	17197	0	0	0.015076	0.061434	0.869522	1314	4	0.32662
FAM194A	5	0.18383	0.34737	1	6311	2	-0.59383	0.015109	0.061525	0.869522	1315	3	1.459
CTAGE5	5	0.074412	0.16245	0.8874	3464	1	-1.0984	0.015149	0.061525	0.869522	1316	4	0.6421
GNAI2	5	0.54393	0.69445	1	12244	2	-0.13472	0.015155	0.061525	0.869522	1317	2	3.0974
CXorf30	4	0.98482	0.98594	1	18183	0	0	0.015184	0.061346	0.869522	1318	4	0.51267
EIF5A2	5	0.75098	0.7989	1	14203	1	-0.2202	0.015202	0.061526	0.869522	1319	4	0.32306
UBE2R2	5	0.99107	0.99173	1	18333	0	0	0.015218	0.061526	0.869522	1320	4	1.04
CRYAA	10	0.17802	0.39284	1	6149	3	-0.36286	0.015222	0.074779	0.869522	1321	5	0.48336
GP5	5	0.89421	0.90396	1	16315	0	0	0.015242	0.061615	0.869522	1322	4	0.37648
EXOSC7	5	0.54299	0.69397	1	12227	2	-0.18283	0.015252	0.061615	0.869522	1323	2	3.1112
STAT5A	4	0.98473	0.98575	1	18182	0	0	0.015274	0.061499	0.869522	1324	4	0.31779
AMFR	5	0.48791	0.63934	1	11378	1	-0.49112	0.015277	0.061616	0.869522	1325	4	0.81607
OR10A7	5	0.12541	0.246	0.97123	4840	1	-0.40845	0.01529	0.061616	0.869522	1326	3	0.58934
DRD1	5	0.084935	0.18011	0.909742	3766	1	-0.63487	0.015297	0.061616	0.869522	1327	3	0.93045
ZDBF2	5	0.92509	0.93602	1	16946	0	0	0.015393	0.063958	0.869522	1328	4	0.73054
DR1	5	0.059312	0.13965	0.854472	3057	1	-0.62883	0.01541	0.063958	0.869522	1329	3	0.45965
RECQL	5	0.82541	0.83902	1	15137	1	-0.42317	0.01545	0.064031	0.869522	1330	4	0.41407
BMP4	10	0.5108	0.75528	1	11702	3	-0.28367	0.01548	0.075039	0.869522	1331	4	1.6278
THEM4	5	0.4243	0.58142	1	10415	2	-0.26443	0.015495	0.064109	0.869522	1332	2	3.3033
PPP6R1	5	0.61011	0.73249	1	12881	1	-0.22169	0.015495	0.064109	0.869522	1333	4	0.40457
DDX50	5	0.066863	0.1509	0.871446	3269	2	-0.40519	0.015509	0.06419	0.869522	1334	2	0.62138
C19orf80	5	0.59382	0.72477	1	12770	1	-1.3653	0.01551	0.06419	0.869522	1335	3	0.65758
ASPM	5	0.20236	0.3792	1	6760	1	-2.057	0.015531	0.064271	0.869522	1336	2	1.0137
ALG1	5	0.29171	0.46963	1	8332	1	-0.59172	0.015545	0.064429	0.869522	1337	3	0.79279
EID1	5	0.33931	0.51118	1	9078	2	-0.22211	0.015552	0.064429	0.869522	1338	2	2.8522
GTSCR1	5	0.4641	0.61379	1	10995	2	-0.23344	0.015568	0.064581	0.869522	1339	1	5.5653
MYL4	5	0.89875	0.90877	1	16416	0	0	0.015626	0.064581	0.869522	1340	4	0.52126
HSPB3	5	0.05744	0.13828	0.854472	2999	2	-0.50519	0.01564	0.064581	0.869522	1341	3	2.0888
C22orf24	5	0.7478	0.79799	1	14164	1	-0.30884	0.015652	0.064581	0.869522	1342	3	0.49411
KITLG	5	0.92106	0.93268	1	16873	0	0	0.015684	0.064581	0.869522	1343	4	0.44184
MFSD10	5	0.32959	0.49867	1	8915	1	-0.90599	0.015688	0.064581	0.869522	1344	4	0.41592
STARD3	5	0.042261	0.099519	0.775235	2428	1	-0.73172	0.015689	0.064581	0.869522	1345	2	2.9475
ELMOD3	5	0.37046	0.53916	1	9572	1	-0.4636	0.015698	0.064581	0.869522	1346	4	0.31992
ARHGDIA	5	0.93451	0.94273	1	17139	0	0	0.01573	0.064674	0.869522	1347	2	0.70732
SMAD3	5	0.93031	0.9389	1	17053	0	0	0.015758	0.064758	0.869522	1348	4	0.36446
KIAA1033	5	0.96626	0.96827	1	17778	0	0	0.015802	0.064758	0.869522	1349	4	0.47821
TRERF1	5	0.46684	0.61596	1	11035	1	-0.49279	0.015812	0.064759	0.869522	1350	4	0.59947
RAB3IL1	5	0.31451	0.48792	1	8691	1	-0.55341	0.01582	0.064759	0.869522	1351	4	0.34436
DMBT1	5	0.33233	0.502	1	8979	1	-0.56914	0.015834	0.064759	0.869522	1352	3	2.1134
PTGES2	5	0.43315	0.58656	1	10538	2	-0.37902	0.015843	0.064759	0.869522	1353	3	0.57467
PLA2G2D	5	0.96244	0.96418	1	17721	0	0	0.015878	0.064861	0.869522	1354	3	0.6778
FAM211A	5	0.80924	0.8277	1	14891	1	-0.18877	0.015881	0.064861	0.869522	1355	3	0.73591
RRP12	4	0.98411	0.98492	1	18164	0	0	0.015886	0.06306	0.869522	1356	4	0.89542
SRSF4	5	0.59888	0.7284	1	12804	1	-0.24144	0.01592	0.065015	0.869522	1357	4	0.4275
BCAT1	5	0.80815	0.82723	1	14880	1	-0.1516	0.015924	0.065015	0.869522	1358	3	0.54183
BAZ1A	5	0.71075	0.77241	1	13793	1	-0.26783	0.015927	0.065015	0.869522	1359	3	0.5213
PTGER4	10	0.69961	0.8683	1	13684	2	-0.20768	0.015944	0.07569	0.869522	1360	6	0.44211
KIAA0947	5	0.60228	0.72977	1	12823	1	-0.64628	0.015991	0.065016	0.869522	1361	3	2.2053
TSKU	5	0.84559	0.85759	1	15449	1	-0.22507	0.016004	0.065107	0.869522	1362	3	0.46838
RCC2	10	0.71466	0.87866	1	13824	2	-0.39506	0.016006	0.075744	0.869522	1363	5	0.55162
ERBB3	5	0.14265	0.27717	0.994898	5265	2	-0.32971	0.016012	0.065107	0.869522	1364	3	0.47369
CUTA	5	0.25923	0.44451	1	7860	1	-2.2905	0.016015	0.065107	0.869522	1365	3	0.51457
CPT2	5	0.98831	0.98924	1	18251	0	0	0.016028	0.065107	0.869522	1366	4	0.30013
ANP32B	5	0.010974	0.028417	0.551027	973	3	-0.59586	0.016028	0.065107	0.869522	1367	2	3.1289
POU5F1B	5	0.17019	0.32282	1	5927	2	-0.20491	0.016077	0.065108	0.869522	1368	1	5.4991
HLA-DMA	10	0.98605	0.98821	1	18199	0	0	0.016106	0.075811	0.869522	1369	7	0.38001
SPAG16	5	0.49774	0.64608	1	11522	2	-0.38451	0.016141	0.067431	0.869522	1370	2	2.9631
HECTD4	5	0.89101	0.90106	1	16243	0	0	0.016174	0.067431	0.869522	1371	3	0.62212
PPIH	5	0.88891	0.89974	1	16198	0	0	0.016188	0.067431	0.869522	1372	4	0.67675
SLC25A41	5	0.67317	0.75913	1	13432	1	-0.24746	0.016242	0.069837	0.869522	1373	4	0.33089
ZNF737	4	0.71811	0.74003	1	13846	1	-0.22878	0.016247	0.063401	0.869522	1374	2	1.0415
MAP3K8	5	0.78121	0.81171	1	14527	1	-0.17693	0.016249	0.069838	0.869522	1375	3	1.4056
ZNF703	5	0.023081	0.057494	0.679944	1583	4	-0.29733	0.016271	0.069921	0.869522	1376	1	2.6298
ANKRD13A	5	0.95842	0.9605	1	17630	0	0	0.016287	0.069921	0.869522	1377	4	0.46947
OGFRL1	5	0.46803	0.61656	1	11061	1	-0.43462	0.01634	0.069922	0.869522	1378	4	0.36087
OR2T10	5	0.45571	0.6061	1	10873	1	-1.114	0.016384	0.069994	0.869522	1379	4	0.4514
TMEM213	4	0.83129	0.84305	1	15231	0	0	0.016401	0.063618	0.869522	1380	3	0.84177
TMEM173	5	0.15535	0.29376	0.997901	5571	2	-0.40383	0.016409	0.070083	0.869522	1381	3	0.43673
CHAMP1	5	0.3472	0.52395	1	9204	1	-0.28273	0.016411	0.070083	0.869522	1382	4	0.26575
LOC643355	5	0.19247	0.35836	1	6536	1	-0.5201	0.016416	0.070083	0.869522	1383	3	1.7424
DNAAF2	5	0.84632	0.85759	1	15462	1	-0.67049	0.016461	0.070166	0.869522	1384	4	0.56014
PGRMC2	5	0.58269	0.72202	1	12663	1	-0.87073	0.016463	0.070166	0.869522	1385	3	1.2418
NISCH	5	0.37553	0.54213	1	9660	1	-0.39126	0.016465	0.070166	0.869522	1386	3	2.1498
THOP1	5	0.83733	0.85028	1	15320	1	-0.17343	0.01649	0.070166	0.869522	1387	3	0.67609
HR	10	0.70899	0.87424	1	13770	2	-0.18596	0.016505	0.07646	0.869522	1388	6	0.36774
TTC19	5	0.13184	0.26117	0.984954	5015	1	-0.88163	0.016513	0.070167	0.869522	1389	2	2.0239
PTPRR	5	0.05533	0.13207	0.843174	2935	2	-0.46151	0.016561	0.070424	0.869522	1390	3	2.0386
EXTL2	5	0.95477	0.95697	1	17557	0	0	0.016563	0.070424	0.869522	1391	3	0.49022
NCALD	15	0.068117	0.2074	0.962822	3299	7	-0.44805	0.016636	0.090865	0.869522	1392	7	0.42383
ZNF799	5	0.49489	0.64492	1	11483	1	-0.25372	0.016644	0.070425	0.869522	1393	2	0.6284
PRIMPOL	5	0.15792	0.2986	1	5631	1	-0.36446	0.016688	0.0705	0.869522	1394	2	0.69289
SLC40A1	10	0.91	0.96147	1	16648	1	-0.25893	0.016694	0.076868	0.869522	1395	7	0.37462
F7	5	0.81034	0.82905	1	14905	1	-0.17323	0.016707	0.0705	0.869522	1396	3	2.2447
FMO2	5	0.65247	0.74825	1	13234	1	-0.23723	0.01675	0.070583	0.869522	1397	3	0.43513
ARL3	4	0.86569	0.87788	1	15792	0	0	0.016767	0.064476	0.869522	1398	1	3.6413
ASGR1	5	0.31875	0.49095	1	8753	1	-0.42895	0.016796	0.070583	0.869522	1399	4	0.28385
SF3A1	9	0.019668	0.06278	0.69524	1392	5	-0.51145	0.016801	0.083509	0.869522	1400	3	2.6192
BBS5	5	0.20409	0.38297	1	6803	2	-0.83826	0.016804	0.070583	0.869522	1401	3	2.3523
TAF9	5	0.72854	0.78155	1	13948	1	-0.69813	0.016829	0.070583	0.869522	1402	4	0.8845
HNF4A	5	0.44731	0.5981	1	10755	2	-0.22624	0.016901	0.070583	0.869522	1403	3	2.005
RPS6KA6	5	0.80409	0.82544	1	14821	1	-0.16349	0.016932	0.070583	0.869522	1404	4	0.5193
CDKL4	5	0.22848	0.42146	1	7377	2	-0.35886	0.016997	0.070583	0.869522	1405	3	2.0182
CNKSR3	5	0.014233	0.038508	0.640868	1132	2	-0.88535	0.016998	0.070583	0.869522	1406	3	0.70925
CYLD	5	0.10268	0.21309	0.962822	4196	1	-1.4267	0.016998	0.070583	0.869522	1407	2	0.82339
ABAT	10	0.65851	0.84284	1	13295	2	-0.20322	0.01701	0.077736	0.869522	1408	6	0.31658
MCAT	5	0.0278	0.068083	0.709098	1815	1	-1.1531	0.017013	0.070583	0.869522	1409	3	0.88781
WDR93	5	0.091503	0.19465	0.942462	3931	1	-1.3676	0.017046	0.070583	0.869522	1410	4	1.8514
MAN1B1	5	0.92931	0.93861	1	17028	0	0	0.017176	0.070671	0.869522	1411	3	0.7948
OXTR	5	0.8372	0.85028	1	15314	1	-0.1611	0.017203	0.070671	0.869522	1412	3	0.52711
MPND	5	0.90548	0.91484	1	16562	0	0	0.017218	0.070671	0.869522	1413	4	0.44396
TUSC2	5	0.99134	0.99202	1	18342	0	0	0.017302	0.070671	0.869522	1414	4	0.31028
EBF4	5	0.99185	0.99258	1	18360	0	0	0.01731	0.070671	0.869522	1415	4	0.29681
SUPT5H	3	0.98267	0.98415	1	18136	0	0	0.017335	0.048474	0.786579	1416	3	1.397
NUDCD1	5	0.94058	0.9472	1	17265	0	0	0.01734	0.070671	0.869522	1417	4	0.33015
RNF166	10	0.65041	0.83818	1	13214	3	-0.23922	0.017346	0.078186	0.869522	1418	6	1.2742
GSG1L	4	0.97884	0.98034	1	18050	0	0	0.017393	0.065644	0.869522	1419	3	0.89058
PPIL2	5	0.67174	0.75867	1	13423	1	-0.31972	0.017393	0.070822	0.869522	1420	3	0.66581
TMA16	5	0.3729	0.54092	1	9611	1	-1.4794	0.01746	0.070823	0.869522	1421	3	1.2326
FAM3A	5	0.75718	0.80395	1	14263	1	-0.27295	0.017482	0.070912	0.869522	1422	3	1.4725
VEZT	5	0.86063	0.86992	1	15691	1	-0.20729	0.01749	0.070913	0.869522	1423	2	0.85722
TMCO1	5	0.90311	0.91259	1	16503	0	0	0.017502	0.070981	0.869522	1424	3	0.58317
NLRC4	5	0.99257	0.99341	1	18379	0	0	0.017529	0.070981	0.869522	1425	4	0.70935
DGAT2L6	5	0.30473	0.47729	1	8528	1	-0.43798	0.01753	0.070981	0.869522	1426	2	2.4166
ZNF777	5	0.85868	0.8686	1	15657	1	-0.17483	0.017532	0.070981	0.869522	1427	4	0.38779
CEACAM3	5	0.869	0.87811	1	15858	1	-0.090022	0.017536	0.070981	0.869522	1428	4	0.72595
BAP1	5	0.99257	0.99341	1	18381	0	0	0.017579	0.070981	0.869522	1429	4	0.92869
IL9	5	0.21688	0.40321	1	7125	1	-0.41487	0.017595	0.070981	0.869522	1430	3	0.57142
TMEM64	5	0.97917	0.98055	1	18055	0	0	0.017601	0.070981	0.869522	1431	4	0.27728
DGKK	5	0.9238	0.93543	1	16924	0	0	0.017627	0.070981	0.869522	1432	3	2.0665
MME	5	0.84915	0.86074	1	15500	1	-0.16793	0.017641	0.070981	0.869522	1433	4	0.55171
TMEM82	4	0.98236	0.98308	1	18127	0	0	0.017643	0.066048	0.869522	1434	4	0.25307
HMGB3	5	0.79158	0.81719	1	14672	1	-0.16389	0.017664	0.070981	0.869522	1435	2	1.3902
NDUFB1	5	0.03331	0.080386	0.740248	2058	3	-0.56714	0.017675	0.070981	0.869522	1436	1	5.31
ERGIC1	5	0.078651	0.16841	0.887821	3595	1	-1.0006	0.017694	0.071074	0.869522	1437	3	0.55239
MAGEB2	5	0.76532	0.80577	1	14357	1	-0.59666	0.017747	0.071164	0.869522	1438	3	1.1244
P4HB	5	0.84586	0.85759	1	15455	1	-0.14772	0.017767	0.071164	0.869522	1439	3	0.34947
CCDC179	5	0.86831	0.87766	1	15848	1	-0.15957	0.017772	0.071164	0.869522	1440	3	2.0647
MYL12B	5	0.89558	0.9056	1	16346	0	0	0.017784	0.071164	0.869522	1441	2	0.64909
LEFTY2	5	0.98822	0.98924	1	18248	0	0	0.0178	0.071164	0.869522	1442	4	0.33646
ZFP82	5	0.56041	0.70959	1	12490	1	-0.15596	0.01783	0.071165	0.869522	1443	4	0.37964
NDRG3	5	0.22392	0.41475	1	7288	2	-0.39014	0.017839	0.071165	0.869522	1444	3	0.76564
TTC4	5	0.91454	0.9264	1	16747	0	0	0.017863	0.071165	0.869522	1445	4	0.95153
TEKT3	5	0.58413	0.72247	1	12679	1	-0.29028	0.017873	0.071245	0.869522	1446	4	0.3426
PAXIP1	5	0.13832	0.26755	0.985119	5171	3	-0.32246	0.01789	0.071245	0.869522	1447	2	0.71393
ARMC4	5	0.96426	0.96585	1	17754	0	0	0.01791	0.071245	0.869522	1448	4	0.57813
P2RX1	5	0.97635	0.97785	1	17996	0	0	0.017922	0.071329	0.869522	1449	4	0.3906
CUEDC1	5	0.89018	0.90062	1	16227	0	0	0.017934	0.071329	0.869522	1450	4	0.47474
GNG7	5	0.93712	0.94383	1	17198	0	0	0.018014	0.071329	0.869522	1451	3	1.9625
TMEM91	5	0.1126	0.22964	0.97123	4473	2	-0.43141	0.01802	0.071329	0.869522	1452	3	0.80797
CENPA	9	0.59022	0.79331	1	12737	2	-0.7777	0.01802	0.085336	0.869522	1453	5	1.03
TMEM68	5	0.17258	0.32653	1	5991	2	-1.2368	0.018063	0.071434	0.869522	1454	1	5.5493
C8orf46	4	0.98192	0.98288	1	18121	0	0	0.018085	0.06687	0.869522	1455	4	0.25018
BCCIP	5	0.82787	0.83995	1	15178	1	-0.17053	0.01811	0.071523	0.869522	1456	4	0.99991
AZU1	10	0.66417	0.84698	1	13352	2	-0.21681	0.018116	0.083986	0.869522	1457	6	0.426
KCNK1	5	0.68576	0.76555	1	13543	1	-0.34476	0.018118	0.071524	0.869522	1458	4	0.24597
GEMIN8	5	0.48507	0.63653	1	11340	2	-0.45202	0.018135	0.07261	0.869522	1459	2	2.7028
IRAK1	10	0.95153	0.97069	1	17484	1	-0.14822	0.01818	0.083987	0.869522	1460	5	1.4053
VAV3	5	0.90859	0.91888	1	16623	0	0	0.018212	0.07379	0.869522	1461	4	0.28119
TMEM144	4	0.40797	0.55905	1	10173	1	-0.37646	0.018242	0.067115	0.869522	1462	3	0.82542
ARID1B	10	0.39415	0.66007	1	9974	3	-0.34657	0.018271	0.084054	0.869522	1463	6	0.22108
RPA4	5	0.48491	0.63653	1	11334	1	-0.44537	0.018279	0.073791	0.869522	1464	4	0.25927
RPL36	5	0.70479	0.77152	1	13728	1	-0.22539	0.018282	0.073791	0.869522	1465	4	0.41812
RBM12B	5	0.00026565	0.00059414	0.056097	199	3	-0.56238	0.018305	0.073791	0.869522	1466	1	2.7741
GCSH	5	0.83653	0.84893	1	15301	1	-0.15382	0.018353	0.073872	0.869522	1467	2	3.25
GCN1L1	5	0.84437	0.85576	1	15432	1	-0.4242	0.018375	0.073872	0.869522	1468	4	0.5742
ASCC2	5	0.80677	0.8259	1	14864	1	-0.21254	0.018387	0.073873	0.869522	1469	4	0.38981
TAOK2	5	0.9061	0.9152	1	16575	0	0	0.018401	0.073873	0.869522	1470	2	2.8113
TBATA	5	0.98344	0.98437	1	18153	0	0	0.018413	0.073957	0.869522	1471	4	0.35137
SEC24D	5	0.98071	0.98223	1	18086	0	0	0.018418	0.073957	0.869522	1472	4	0.38608
EHD3	5	0.22026	0.4073	1	7208	2	-0.30272	0.01845	0.074056	0.869522	1473	3	1.9931
RIPK1	10	0.21851	0.46737	1	7157	4	-0.33269	0.018457	0.084696	0.869522	1474	3	2.3631
CLDN4	5	0.53862	0.68865	1	12152	1	-0.28371	0.018475	0.074145	0.869522	1475	4	0.47119
MIER3	5	0.97515	0.97616	1	17972	0	0	0.018488	0.074145	0.869522	1476	4	0.40287
FAM229A	5	0.96072	0.96232	1	17679	0	0	0.018502	0.074145	0.869522	1477	2	1.55
IDI2	5	0.98762	0.98873	1	18235	0	0	0.018523	0.074145	0.869522	1478	3	0.40728
ASCL5	5	0.16534	0.31119	1	5802	1	-0.42455	0.018547	0.074145	0.869522	1479	2	2.9732
RAB14	5	0.85713	0.86815	1	15634	1	-0.19188	0.018585	0.074145	0.869522	1480	3	0.52242
ZBTB2	5	0.46943	0.6183	1	11087	2	-0.38051	0.01861	0.074145	0.869522	1481	3	0.58788
FBXO6	5	0.52667	0.6765	1	11962	1	-0.31702	0.018637	0.074146	0.869522	1482	4	0.48211
TMEM117	5	0.9431	0.94843	1	17317	0	0	0.018642	0.074146	0.869522	1483	4	0.519
KCNK2	5	0.012539	0.03216	0.579906	1045	2	-0.88769	0.018643	0.074146	0.869522	1484	2	2.9639
FAM86A	5	0.056784	0.13682	0.854472	2980	2	-0.45073	0.018692	0.074146	0.869522	1485	1	5.1903
CCDC106	5	0.45055	0.60492	1	10804	2	-0.24482	0.01874	0.074146	0.869522	1486	3	2.4065
ACTA1	10	0.3267	0.58919	1	8861	4	-0.25038	0.018747	0.089837	0.869522	1487	3	2.2388
ZNF112	5	0.93413	0.94196	1	17129	0	0	0.018788	0.07434	0.869522	1488	2	2.8413
SPRYD3	5	0.82729	0.83995	1	15167	1	-0.21206	0.018796	0.07434	0.869522	1489	4	0.37777
FAM76A	5	0.45386	0.6061	1	10845	1	-0.7572	0.018804	0.074429	0.869522	1490	4	0.32315
DNAJA1	10	0.66042	0.84456	1	13318	1	-0.32629	0.018807	0.089983	0.869522	1491	7	0.43477
GREB1L	5	0.77173	0.80714	1	14416	1	-0.18787	0.018856	0.074429	0.869522	1492	4	0.62364
HYI	5	0.8496	0.86074	1	15505	1	-0.13695	0.018885	0.074429	0.869522	1493	2	1.6614
OR7G2	5	0.88608	0.89498	1	16147	0	0	0.018895	0.074429	0.869522	1494	3	0.56768
C15orf62	5	0.85144	0.86304	1	15528	1	-0.16403	0.018977	0.07452	0.869522	1495	3	0.43805
IL17RA	5	0.4106	0.56768	1	10218	1	-0.55775	0.018998	0.074619	0.869522	1496	3	0.75188
CHD3	5	0.98955	0.99054	1	18290	0	0	0.019035	0.074716	0.869522	1497	4	0.37714
MAP3K14	5	0.016804	0.044237	0.658102	1252	1	-1.046	0.019043	0.074716	0.869522	1498	4	0.3178
PSMD14	4	0.89949	0.90702	1	16430	0	0	0.019054	0.068348	0.869522	1499	2	1.7054
AK3	5	0.98359	0.98458	1	18155	0	0	0.019129	0.075076	0.869522	1500	4	0.36886
TNIP1	10	0.32495	0.58843	1	8839	1	-0.69677	0.019133	0.090515	0.869522	1501	5	1.38
PBRM1	5	0.49455	0.64436	1	11478	2	-0.47003	0.019162	0.075178	0.869522	1502	3	0.66887
KRTAP10-5	5	0.40582	0.56337	1	10156	1	-2.6422	0.01917	0.075179	0.869522	1503	3	0.65546
CDC26	5	0.50139	0.65052	1	11569	2	-0.31256	0.019175	0.075179	0.869522	1504	1	5.468
RHOXF1	5	0.58508	0.72247	1	12688	1	-0.23775	0.019182	0.075179	0.869522	1505	4	0.41854
CDRT15L2	5	0.45492	0.6061	1	10863	1	-0.51396	0.019185	0.075179	0.869522	1506	2	1.1117
IMP4	5	0.32748	0.49733	1	8875	2	-0.67622	0.019217	0.075293	0.869522	1507	2	1.6284
OR56A5	5	0.45824	0.60851	1	10905	1	-0.91036	0.019224	0.075392	0.869522	1508	1	5.4428
ZBTB4	10	0.060878	0.1689	0.887821	3104	5	-0.56538	0.019229	0.090967	0.869522	1509	2	3.1254
SMIM17	4	0.98073	0.98238	1	18089	0	0	0.019266	0.068348	0.869522	1510	4	0.28892
C17orf96	5	0.95131	0.95482	1	17478	0	0	0.019272	0.075392	0.869522	1511	4	1.5206
LURAP1L	5	0.94653	0.95109	1	17369	0	0	0.019273	0.075392	0.869522	1512	4	0.26575
TMEM81	5	0.4771	0.62706	1	11209	1	-0.89633	0.019279	0.075392	0.869522	1513	3	0.53962
ENPP3	10	0.38121	0.64595	1	9757	3	-0.46374	0.019291	0.091042	0.869522	1514	5	0.72224
SEC14L2	5	0.9713	0.97328	1	17887	0	0	0.019302	0.075488	0.869522	1515	4	0.43548
SNX3	5	0.016222	0.042754	0.654794	1226	1	-0.77734	0.019313	0.075489	0.869522	1516	4	0.28023
PTMA	5	0.98244	0.98389	1	18130	0	0	0.019326	0.075591	0.869522	1517	4	0.54091
KCNG1	5	0.96307	0.96454	1	17735	0	0	0.019334	0.075591	0.869522	1518	3	1.5897
DEFB129	5	0.89576	0.9056	1	16353	0	0	0.019369	0.075854	0.869522	1519	2	1.9303
FAM206A	4	0.89806	0.90665	1	16403	0	0	0.019371	0.068569	0.869522	1520	3	0.35361
FMOD	5	0.4824	0.63314	1	11289	1	-0.69703	0.019374	0.075854	0.869522	1521	4	0.40074
ZNF791	5	0.46488	0.61379	1	11004	1	-0.26886	0.01938	0.075854	0.869522	1522	4	0.22627
RYK	5	0.90833	0.91852	1	16616	0	0	0.019381	0.075854	0.869522	1523	2	0.57839
ZNF470	5	0.33879	0.51071	1	9071	2	-0.23269	0.019401	0.075854	0.869522	1524	3	0.32831
AFAP1	4	0.97715	0.97839	1	18014	0	0	0.019473	0.068652	0.869522	1525	3	0.82595
SYT6	5	0.55168	0.70105	1	12357	2	-0.11571	0.019484	0.07594	0.869522	1526	3	0.4121
H3F3B	5	0.024391	0.061063	0.694878	1642	3	-0.52287	0.01949	0.07594	0.869522	1527	1	5.3501
FAM198B	5	0.41105	0.56815	1	10226	1	-1.2867	0.01949	0.07594	0.869522	1528	2	2.772
MANEA	5	0.75579	0.80259	1	14252	1	-0.30349	0.019508	0.075941	0.869522	1529	3	0.52582
KIFC1	5	0.45047	0.60492	1	10802	2	-0.2174	0.01958	0.076136	0.869522	1530	3	0.712
MYPN	10	0.9983	0.99845	1	18579	0	0	0.019616	0.092183	0.869522	1531	6	0.39758
NR2C2AP	5	0.97378	0.97518	1	17948	0	0	0.019655	0.076137	0.869522	1532	4	0.51473
GPS2	5	0.025693	0.06316	0.69524	1716	3	-0.52127	0.019707	0.076235	0.869522	1533	1	5.0924
ST7	5	0.8694	0.87903	1	15865	1	-0.51661	0.019716	0.076235	0.869522	1534	3	0.76589
GPD1	5	0.98549	0.98653	1	18195	0	0	0.019736	0.076236	0.869522	1535	4	0.37294
OSGEP	5	0.46649	0.61596	1	11025	1	-0.31955	0.019744	0.076236	0.869522	1536	4	0.57305
C2orf91	4	0.97335	0.97494	1	17937	0	0	0.019758	0.069296	0.869522	1537	3	0.65985
SART1	4	0.96747	0.96996	1	17800	0	0	0.019767	0.069296	0.869522	1538	3	1.0151
SIGLEC15	10	0.94773	0.9698	1	17394	1	-0.32807	0.019802	0.092587	0.869522	1539	7	0.37866
FAM160A1	5	0.02924	0.070688	0.711406	1874	2	-0.74449	0.019804	0.07643	0.869522	1540	1	5.2947
CRNN	5	0.24631	0.43484	1	7670	1	-0.521	0.019852	0.076533	0.869522	1541	3	1.9449
CCDC107	5	0.35941	0.53651	1	9396	2	-0.60113	0.01992	0.076634	0.869522	1542	3	1.1205
SSTR4	5	0.56132	0.71016	1	12500	1	-0.46343	0.019938	0.076823	0.869522	1543	4	0.47488
ACTN3	5	0.97798	0.97886	1	18027	0	0	0.019949	0.076823	0.869522	1544	4	1.5618
WISP1	5	0.69631	0.76793	1	13643	1	-0.19241	0.019976	0.076912	0.869522	1545	3	0.534
COL25A1	5	0.93593	0.94356	1	17170	0	0	0.020142	0.077012	0.869522	1546	3	1.996
TMCO4	5	0.79706	0.82088	1	14731	1	-0.20403	0.020194	0.077012	0.869522	1547	4	0.4781
RAB5C	10	0.58252	0.7969	1	12661	1	-0.36214	0.020194	0.093464	0.869522	1548	5	1.4371
RNF34	5	0.31171	0.48585	1	8643	1	-0.40104	0.020219	0.077012	0.869522	1549	4	0.35623
CYP27C1	5	0.33189	0.50155	1	8970	2	-0.28904	0.020223	0.077012	0.869522	1550	3	0.45092
RBM14-RBM4	7	0.052875	0.13867	0.854472	2864	4	-0.54148	0.020275	0.081912	0.869522	1551	3	0.51046
CCDC89	5	0.27763	0.46093	1	8144	2	-1.3358	0.020287	0.077115	0.869522	1552	2	2.5957
ACSM4	5	0.11341	0.23246	0.97123	4494	3	-0.33074	0.020287	0.077115	0.869522	1553	2	2.7567
CTDSP1	5	0.32791	0.49823	1	8881	1	-0.84803	0.020287	0.077115	0.869522	1554	3	1.9388
OSBP	5	0.18511	0.34865	1	6343	2	-0.89062	0.020311	0.077227	0.869522	1555	3	0.83762
C22orf23	5	0.65885	0.75137	1	13298	1	-0.55146	0.020346	0.077316	0.869522	1556	4	0.47856
LRRC63	5	0.47147	0.61882	1	11115	2	-0.28653	0.020384	0.077464	0.869522	1557	2	1.3283
ANXA9	5	0.0045832	0.01336	0.392665	637	1	-1.4312	0.020385	0.077464	0.869522	1558	4	0.45669
GADD45A	5	0.01724	0.044359	0.658349	1272	4	-0.45621	0.020432	0.077566	0.869522	1559	1	5.3285
SLC7A10	5	0.27013	0.45499	1	8027	1	-0.74349	0.020454	0.077566	0.869522	1560	4	0.56052
AGXT	5	0.30193	0.47561	1	8486	1	-0.42953	0.020456	0.077566	0.869522	1561	3	0.54024
RDH11	5	0.42008	0.57835	1	10358	2	-0.18865	0.020459	0.077566	0.869522	1562	3	0.44352
PRICKLE3	5	0.70612	0.77198	1	13747	1	-0.22821	0.02048	0.077566	0.869522	1563	4	0.88123
NUF2	5	0.8833	0.8919	1	16103	0	0	0.020507	0.077566	0.869522	1564	4	1.0041
OPN1MW	3	0.97948	0.98156	1	18066	0	0	0.020518	0.053361	0.821738	1565	3	0.21758
STX1A	5	0.91864	0.92804	1	16836	0	0	0.020533	0.077786	0.869522	1566	3	0.56872
TNS3	5	0.98911	0.99015	1	18272	0	0	0.020538	0.077786	0.869522	1567	4	0.53716
TRIP4	5	0.51882	0.66943	1	11834	1	-0.50198	0.020561	0.077786	0.869522	1568	3	0.4989
ADAM22	5	0.88429	0.8941	1	16118	0	0	0.020574	0.077786	0.869522	1569	3	0.56177
IMPACT	5	0.83063	0.84173	1	15221	1	-0.10255	0.020578	0.077786	0.869522	1570	4	0.54513
HES2	10	0.51182	0.75667	1	11712	3	-0.23027	0.02058	0.094234	0.869522	1571	6	1.2357
UBA52	10	0.23769	0.49778	1	7545	4	-0.7543	0.020622	0.094234	0.869522	1572	4	1.1819
RAB41	5	0.62792	0.73744	1	13023	1	-0.29815	0.020661	0.077786	0.869522	1573	4	0.52903
HDGFRP2	10	0.1757	0.38951	1	6079	2	-0.41766	0.020676	0.094319	0.869522	1574	3	2.3106
PLCH1	10	0.99589	0.99686	1	18484	0	0	0.020687	0.094319	0.869522	1575	7	0.43094
UGT1A8	5	0.99118	0.99179	1	18336	0	0	0.020717	0.077787	0.869522	1576	4	0.33489
CHKB	5	0.87596	0.88685	1	15968	1	-0.075314	0.02072	0.077787	0.869522	1577	4	0.40895
KRTAP21-3	5	0.75224	0.7989	1	14214	1	-0.23056	0.020742	0.077787	0.869522	1578	3	0.55134
CYP2C19	5	0.94092	0.9472	1	17271	0	0	0.020779	0.077787	0.869522	1579	4	0.38476
ARSI	5	0.049639	0.11861	0.813228	2733	2	-1.1067	0.020794	0.077787	0.869522	1580	2	2.7549
HIVEP1	5	0.51838	0.66943	1	11823	2	-0.3634	0.020794	0.077787	0.869522	1581	1	4.9396
PIK3CG	5	0.71039	0.77241	1	13785	1	-0.63899	0.020794	0.077787	0.869522	1582	2	2.6914
VWA9	5	0.14291	0.27717	0.994898	5269	3	-0.56517	0.02082	0.077787	0.869522	1583	2	0.85723
CD5	5	0.31546	0.48922	1	8708	1	-0.81582	0.020861	0.077897	0.869522	1584	4	0.80453
2022-09-08	5	0.97756	0.97825	1	18019	0	0	0.020867	0.077897	0.869522	1585	4	0.40904
RNASEL	5	0.96572	0.96703	1	17771	0	0	0.020908	0.077897	0.869522	1586	3	0.58286
SPEG	10	0.46402	0.73178	1	10994	3	-0.27019	0.02091	0.09885	0.869522	1587	5	1.4397
EEF1D	5	0.99254	0.99341	1	18377	0	0	0.021031	0.078312	0.869522	1588	4	0.33396
HNRNPA3	5	0.95455	0.95697	1	17554	0	0	0.021035	0.078312	0.869522	1589	4	1.5
SLC10A1	5	0.13897	0.26999	0.990477	5189	3	-0.32437	0.021035	0.078312	0.869522	1590	2	2.595
C14orf39	5	0.27489	0.4605	1	8093	1	-0.44189	0.021035	0.078312	0.869522	1591	3	1.8363
POLR2F	5	0.4883	0.63934	1	11385	2	-0.34228	0.021045	0.078312	0.869522	1592	3	0.47992
GCC1	5	0.8782	0.88777	1	15998	1	-0.21652	0.021138	0.078408	0.869522	1593	2	0.46651
EDC4	5	0.30453	0.47729	1	8523	2	-0.44307	0.021156	0.078408	0.869522	1594	3	1.9293
DHX32	5	0.29346	0.47141	1	8364	1	-0.47667	0.021165	0.078408	0.869522	1595	4	0.4191
MELK	5	0.60874	0.73159	1	12871	1	-0.3413	0.021194	0.078516	0.869522	1596	4	0.34645
GSG1	5	0.16189	0.3063	1	5721	1	-1.0254	0.021205	0.078516	0.869522	1597	4	0.4315
CRYAB	8	0.076474	0.19087	0.938925	3526	5	-0.30512	0.021212	0.088699	0.869522	1598	2	3.2247
FRK	5	0.97724	0.97799	1	18016	0	0	0.021234	0.078516	0.869522	1599	4	0.29268
PRM3	5	0.81255	0.82996	1	14942	1	-0.17406	0.021262	0.078516	0.869522	1600	4	0.23324
HYAL2	10	0.077269	0.21203	0.962822	3551	1	-0.96336	0.021267	0.099871	0.869522	1601	6	0.45351
DOCK6	5	0.10106	0.21201	0.962822	4148	2	-0.42621	0.021269	0.078516	0.869522	1602	3	1.1524
PBX2	5	0.02597	0.064302	0.703659	1726	2	-0.46407	0.021277	0.078516	0.869522	1603	2	2.6852
F8A1	5	0.93222	0.94002	1	17088	0	0	0.021345	0.078516	0.869522	1604	4	0.55508
SLC18B1	5	0.98717	0.98828	1	18225	0	0	0.021345	0.078516	0.869522	1605	4	0.43512
NFIX	10	0.17365	0.38484	1	6024	3	-0.32095	0.021351	0.10007	0.869522	1606	3	2.1721
PTGDS	10	0.49514	0.74843	1	11490	3	-0.27065	0.021351	0.10007	0.869522	1607	4	1.7457
EPB41L5	5	0.22576	0.41606	1	7316	2	-0.4508	0.021351	0.078516	0.869522	1608	3	0.60343
HAT1	5	0.97041	0.9724	1	17867	0	0	0.021377	0.078516	0.869522	1609	4	0.47063
PTGES	5	0.94686	0.95132	1	17380	0	0	0.021461	0.078516	0.869522	1610	4	0.36248
PDE2A	5	0.72628	0.78111	1	13930	1	-0.22574	0.021466	0.078516	0.869522	1611	3	0.51855
KANSL3	5	0.71689	0.77708	1	13838	1	-0.34631	0.021466	0.078516	0.869522	1612	4	1.2185
PSME3	5	0.90189	0.91184	1	16474	0	0	0.021479	0.078516	0.869522	1613	4	0.65045
TPH2	5	0.86767	0.87766	1	15834	1	-0.15009	0.021494	0.078516	0.869522	1614	2	2.7244
CCDC173	4	0.88892	0.8991	1	16199	0	0	0.021516	0.071538	0.869522	1615	3	0.61251
UCKL1	5	0.86023	0.8695	1	15683	1	-0.11864	0.021527	0.078516	0.869522	1616	4	0.40032
TTBK2	5	0.92748	0.93749	1	16995	0	0	0.021532	0.078516	0.869522	1617	3	0.60986
CLTB	5	0.40346	0.56145	1	10115	2	-0.77114	0.021542	0.078516	0.869522	1618	2	1.2949
ZNF410	5	0.76544	0.80577	1	14358	1	-0.16375	0.021564	0.078517	0.869522	1619	4	0.29663
PTRH2	5	0.73997	0.78886	1	14076	1	-0.22012	0.021565	0.078517	0.869522	1620	2	0.61029
SLC7A4	5	0.14296	0.27717	0.994898	5275	3	-0.38224	0.021598	0.078517	0.869522	1621	2	0.78573
ZNF526	5	0.71976	0.77797	1	13862	1	-0.18462	0.021648	0.078517	0.869522	1622	4	0.471
WDR1	5	0.54647	0.69615	1	12280	1	-1.8155	0.021711	0.078517	0.869522	1623	4	1.4913
RALY	5	0.93621	0.94356	1	17179	0	0	0.021714	0.078517	0.869522	1624	2	0.78745
TNFRSF21	5	0.76357	0.80577	1	14335	1	-0.27617	0.021722	0.078517	0.869522	1625	3	0.5109
CA1	5	0.91411	0.92574	1	16734	0	0	0.021729	0.078517	0.869522	1626	3	2.0358
WNT10A	5	0.035267	0.083888	0.742855	2132	1	-1.2172	0.0218	0.078517	0.869522	1627	4	0.37164
C2orf40	5	0.82547	0.83902	1	15138	1	-0.49841	0.021878	0.078517	0.869522	1628	4	0.43814
CD14	5	0.8226	0.83811	1	15089	1	-0.17998	0.02188	0.078517	0.869522	1629	3	1.0551
ATP6V1A	5	0.89683	0.90797	1	16370	0	0	0.021896	0.078517	0.869522	1630	4	1.2283
CH25H	5	0.19413	0.36307	1	6567	2	-0.40103	0.02192	0.078627	0.869522	1631	3	0.46942
STRIP1	5	0.93887	0.94569	1	17227	0	0	0.021929	0.078627	0.869522	1632	4	0.6057
GART	5	0.91254	0.92338	1	16698	0	0	0.022007	0.078627	0.869522	1633	4	0.82746
STAT1	5	0.68793	0.76555	1	13562	1	-0.27759	0.022025	0.078627	0.869522	1634	2	2.6796
SULT1C4	5	0.21842	0.40591	1	7155	1	-0.621	0.022031	0.078627	0.869522	1635	3	0.59367
MPG	5	0.26077	0.4462	1	7885	1	-0.49777	0.022057	0.078627	0.869522	1636	4	0.56596
ANAPC16	5	0.96515	0.96654	1	17767	0	0	0.022074	0.078736	0.869522	1637	4	0.45035
USF2	5	0.12113	0.2433	0.97123	4718	2	-0.39555	0.022121	0.078736	0.869522	1638	2	1.3645
EML3	5	0.89387	0.90311	1	16310	0	0	0.02216	0.078737	0.869522	1639	4	0.7271
SLC6A13	5	0.99141	0.99208	1	18346	0	0	0.022187	0.078737	0.869522	1640	4	0.34144
HEPH	5	0.77377	0.80714	1	14441	1	-0.16668	0.022193	0.078737	0.869522	1641	4	0.19057
CEACAM5	5	0.415	0.57087	1	10288	1	-0.2565	0.022194	0.078737	0.869522	1642	3	1.8776
ATP6V0D1	5	0.9921	0.99283	1	18368	0	0	0.022241	0.078923	0.869522	1643	4	0.56415
ESRRA	5	0.1568	0.297	1	5605	1	-1.1771	0.022281	0.079015	0.869522	1644	4	0.4031
ZAP70	5	0.7999	0.82411	1	14767	1	-0.17362	0.022304	0.079015	0.869522	1645	2	0.92231
KIF5C	5	0.88959	0.90061	1	16214	0	0	0.022313	0.079015	0.869522	1646	3	0.91852
TNFAIP8	5	0.90981	0.91954	1	16645	0	0	0.022314	0.079015	0.869522	1647	4	0.42771
TYMP	5	0.81591	0.83315	1	14978	1	-0.19436	0.022346	0.079015	0.869522	1648	4	0.35201
TMX1	5	0.29617	0.47349	1	8403	1	-0.39884	0.022363	0.079015	0.869522	1649	3	0.59356
TSLP	5	0.97938	0.98079	1	18060	0	0	0.022388	0.079101	0.869522	1650	4	0.35867
KPNA2	5	0.073569	0.16194	0.8874	3441	3	-0.41016	0.022435	0.079427	0.869522	1651	1	4.7394
KIAA0196	5	0.0084913	0.021665	0.467761	866	2	-0.88039	0.022448	0.079427	0.869522	1652	3	0.63857
DLG4	10	0.25136	0.51092	1	7742	4	-0.33093	0.022458	0.10195	0.869522	1653	2	3.0475
PLK5	4	0.88024	0.89251	1	16036	0	0	0.022515	0.07269	0.869522	1654	3	0.8688
DYNC1I1	5	0.44567	0.59755	1	10733	1	-0.40711	0.022531	0.079428	0.869522	1655	4	0.46549
MTMR3	5	0.90348	0.91259	1	16515	0	0	0.02254	0.079428	0.869522	1656	4	0.53373
CNFN	5	0.63224	0.74053	1	13055	1	-0.18801	0.022555	0.079428	0.869522	1657	2	1.459
INO80E	3	0.97744	0.97903	1	18018	0	0	0.022561	0.056531	0.8512	1658	3	0.47213
KLHL9	5	0.93739	0.94383	1	17204	0	0	0.022573	0.079555	0.869522	1659	3	0.55935
SLC25A26	5	0.74056	0.79021	1	14085	1	-0.25214	0.02259	0.079556	0.869522	1660	2	0.60334
ARHGEF39	5	0.736	0.78473	1	14023	1	-0.31809	0.022603	0.079658	0.869522	1661	4	0.46086
FN1	5	0.87216	0.88226	1	15902	1	-0.17787	0.022628	0.079659	0.869522	1662	3	1.8878
NELFCD	5	0.80332	0.82499	1	14810	1	-0.47661	0.022657	0.079755	0.869522	1663	2	2.9143
MORC1	5	0.16156	0.30469	1	5715	3	-0.42017	0.022748	0.079972	0.869522	1664	1	4.7921
PGGT1B	5	0.8416	0.85393	1	15391	1	-0.20231	0.02277	0.079972	0.869522	1665	4	0.50557
SLC30A1	5	0.70279	0.77064	1	13712	1	-0.43822	0.022813	0.080079	0.869522	1666	4	0.41254
TMEM52	5	0.96008	0.96175	1	17662	0	0	0.022848	0.080079	0.869522	1667	3	0.57369
ZNF329	10	0.4979	0.75008	1	11525	1	-0.33472	0.022875	0.10306	0.869522	1668	7	0.21627
SPAM1	5	0.38977	0.55301	1	9897	2	-0.18815	0.022886	0.080412	0.869522	1669	2	0.89326
NCMAP	5	0.15406	0.29083	0.994898	5537	2	-0.41883	0.022893	0.080412	0.869522	1670	3	1.8284
SPC25	5	0.93971	0.94617	1	17246	0	0	0.022897	0.080412	0.869522	1671	4	1.4682
ZFPM1	5	0.25489	0.44244	1	7791	1	-0.32586	0.022941	0.080509	0.869522	1672	1	1.8375
PIP5K1C	5	0.99054	0.99123	1	18318	0	0	0.022942	0.080509	0.869522	1673	4	0.27888
SDSL	5	0.9843	0.98531	1	18170	0	0	0.022997	0.080681	0.869522	1674	4	0.63165
LILRB4	10	0.95261	0.97098	1	17510	1	-0.16594	0.023023	0.10342	0.869522	1675	7	0.45663
CEP104	5	0.87216	0.88226	1	15903	1	-0.10511	0.023024	0.080681	0.869522	1676	4	0.27876
HIGD1C	5	0.94983	0.95301	1	17444	0	0	0.023051	0.080681	0.869522	1677	4	0.32112
RAB2B	5	0.91645	0.92772	1	16789	0	0	0.023057	0.080681	0.869522	1678	4	0.35809
PFDN5	5	0.98416	0.98521	1	18165	0	0	0.023076	0.080681	0.869522	1679	3	0.64058
PDS5A	5	0.039534	0.09448	0.769672	2308	3	-0.41379	0.02311	0.080681	0.869522	1680	2	2.7939
GRHPR	10	0.13151	0.31271	1	5007	2	-0.47413	0.023179	0.10351	0.869522	1681	6	1.2972
FBLN2	5	0.13382	0.26365	0.984954	5072	3	-0.37922	0.023183	0.080785	0.869522	1682	2	0.64504
ZMYND11	5	0.89822	0.90797	1	16408	0	0	0.023194	0.080785	0.869522	1683	4	0.3396
LDB1	10	0.99191	0.99367	1	18365	0	0	0.023205	0.10367	0.869522	1684	5	0.60593
HYOU1	5	0.70075	0.76974	1	13695	1	-0.28467	0.02323	0.080785	0.869522	1685	3	1.0144
LIMK1	9	0.86706	0.93841	1	15827	2	-0.2044	0.023269	0.09952	0.869522	1686	2	2.9118
C9orf135	5	0.8452	0.85759	1	15443	1	-0.2967	0.023294	0.08091	0.869522	1687	3	0.54902
ZKSCAN5	5	0.42016	0.57835	1	10359	1	-0.60516	0.023297	0.08091	0.869522	1688	3	0.44667
MYADML2	5	0.36242	0.53697	1	9447	1	-0.36912	0.023301	0.08091	0.869522	1689	4	0.29684
ZFP36L1	10	0.33929	0.601	1	9077	3	-0.25642	0.023365	0.10386	0.869522	1690	4	0.6614
CDK5R2	5	0.89888	0.90877	1	16419	0	0	0.023375	0.08112	0.869522	1691	2	2.4743
CLDN18	10	0.39107	0.6564	1	9917	2	-0.75286	0.023377	0.10386	0.869522	1692	7	0.45072
ZFAND4	5	0.97331	0.97518	1	17933	0	0	0.023389	0.081121	0.869522	1693	4	0.25264
IL7R	5	0.87583	0.88685	1	15965	1	-0.16195	0.023398	0.081121	0.869522	1694	4	0.4611
CST8	5	0.84232	0.85483	1	15402	1	-0.27341	0.023422	0.081121	0.869522	1695	4	0.54982
SYCE3	5	0.97942	0.98079	1	18063	0	0	0.023438	0.081412	0.869522	1696	4	0.7211
HELT	5	0.52078	0.67103	1	11877	1	-0.20884	0.023471	0.081413	0.869522	1697	2	1.0894
HSDL1	5	0.94122	0.9472	1	17277	0	0	0.023484	0.081523	0.869522	1698	4	0.44083
NOTCH2NL	5	0.91826	0.92804	1	16825	0	0	0.023527	0.081524	0.869522	1699	3	0.5708
ELMOD1	5	0.96082	0.96251	1	17682	0	0	0.02354	0.081628	0.869522	1700	4	0.45903
IFNL1	5	0.23198	0.42222	1	7449	2	-0.27767	0.023598	0.08183	0.869522	1701	3	0.59951
FLJ45513	5	0.051591	0.12589	0.83088	2828	3	-0.4909	0.023616	0.08194	0.869522	1702	1	4.861
KRTDAP	5	0.92258	0.93329	1	16901	0	0	0.023679	0.082051	0.869522	1703	3	0.49927
SPNS1	5	0.2391	0.42676	1	7563	2	-0.26245	0.023679	0.082051	0.869522	1704	2	0.59916
WNT7B	10	0.23229	0.48865	1	7456	4	-0.34245	0.023756	0.10462	0.869522	1705	3	2.256
ATF1	5	0.63321	0.74053	1	13061	1	-0.31438	0.023765	0.082052	0.869522	1706	2	2.3498
PRRC1	5	0.716	0.77662	1	13833	1	-0.46997	0.023771	0.082052	0.869522	1707	4	0.39757
DLGAP2	5	0.98059	0.98213	1	18085	0	0	0.023782	0.082052	0.869522	1708	4	0.39221
TROAP	5	0.81618	0.83361	1	14985	1	-0.18449	0.023817	0.082158	0.869522	1709	2	0.83651
SYT2	5	0.88016	0.89052	1	16035	1	-0.16706	0.023834	0.08227	0.869522	1710	2	0.66638
MEST	10	0.54686	0.77755	1	12288	1	-0.40218	0.02389	0.10472	0.869522	1711	7	0.56873
GNB1	5	0.77884	0.81124	1	14501	1	-0.17132	0.023912	0.082271	0.869522	1712	2	0.80986
CYSLTR1	5	0.92469	0.93602	1	16939	0	0	0.023917	0.082271	0.869522	1713	4	0.46862
SFT2D1	5	0.86916	0.87811	1	15861	1	-0.18863	0.02397	0.082377	0.869522	1714	3	0.63696
HSDL2	5	0.11156	0.22647	0.969464	4445	2	-0.3578	0.024015	0.082377	0.869522	1715	3	0.49482
KLHL31	5	0.95821	0.95991	1	17622	0	0	0.02402	0.082377	0.869522	1716	4	0.34035
RNF175	5	0.78644	0.81582	1	14595	1	-0.18935	0.024038	0.082377	0.869522	1717	4	0.34926
CEP89	5	0.90366	0.91259	1	16523	0	0	0.024042	0.082377	0.869522	1718	3	0.59244
MAP3K11	9	0.79955	0.89892	1	14760	2	-0.40474	0.024077	0.1008	0.869522	1719	5	1.2264
KRTAP4-9	5	0.19442	0.36395	1	6574	2	-0.30465	0.024146	0.08273	0.869522	1720	2	2.5278
ADIPOR2	5	0.90584	0.91484	1	16569	0	0	0.024164	0.082731	0.869522	1721	4	0.65101
STIL	5	0.39575	0.5573	1	9988	2	-0.6296	0.02418	0.082731	0.869522	1722	3	1.3186
ARMC9	5	0.98654	0.98763	1	18213	0	0	0.024201	0.082849	0.869522	1723	4	0.61918
DVL3	5	0.52285	0.6743	1	11905	1	-0.38616	0.024215	0.08285	0.869522	1724	3	0.60477
ANKRD42	5	0.88317	0.8919	1	16099	0	0	0.024218	0.08285	0.869522	1725	3	0.76598
FAM173B	5	0.37329	0.54092	1	9617	2	-0.77804	0.024242	0.082964	0.869522	1726	3	1.7724
CPSF6	5	0.98004	0.98159	1	18076	0	0	0.024242	0.082964	0.869522	1727	4	0.34692
PABPC1L2B	4	0.63212	0.68578	1	13054	1	-0.18804	0.024262	0.075671	0.869522	1728	3	0.5734
C4orf51	5	0.27393	0.45961	1	8081	2	-0.93363	0.024313	0.08313	0.869522	1729	3	0.67041
MS4A10	5	0.48664	0.63765	1	11365	1	-0.98659	0.024338	0.083131	0.869522	1730	3	1.8447
ZC3H11A	4	0.93081	0.9332	1	17062	0	0	0.02434	0.075671	0.869522	1731	3	0.4956
RAB38	5	0.81508	0.83224	1	14966	1	-0.20059	0.024374	0.083233	0.869522	1732	4	0.34466
GPR148	5	0.43194	0.58552	1	10525	2	-0.22207	0.024386	0.083233	0.869522	1733	1	3.4776
KCTD21	5	0.34173	0.51434	1	9112	2	-0.3211	0.024391	0.083233	0.869522	1734	3	0.4779
HOPX	10	0.25888	0.5179	1	7854	2	-0.44247	0.024397	0.10623	0.869522	1735	5	0.35966
DGCR2	5	0.89573	0.9056	1	16352	0	0	0.024418	0.083233	0.869522	1736	4	0.40127
FUT5	5	0.013116	0.034101	0.596822	1073	2	-0.77509	0.024422	0.083233	0.869522	1737	3	0.25813
OIP5	5	0.50232	0.65278	1	11582	1	-0.59103	0.024425	0.083233	0.869522	1738	4	0.24783
SPATA17	5	0.98799	0.98903	1	18242	0	0	0.02445	0.083233	0.869522	1739	4	0.43576
TGFA	5	0.98145	0.98287	1	18107	0	0	0.024482	0.083354	0.869522	1740	4	0.36885
MAFG	5	0.86572	0.87486	1	15794	1	-0.09692	0.0245	0.083354	0.869522	1741	3	0.46527
IZUMO4	5	0.20072	0.37704	1	6712	1	-0.54046	0.024528	0.083354	0.869522	1742	3	0.865
TMEM110-MUSTN1	1	0.97547	0.98341	1	17982	0	0	0.02453	0.01659	0.512953	1743	1	0.86853
COL2A1	5	0.86806	0.87766	1	15844	1	-0.13166	0.024607	0.083355	0.869522	1744	3	0.66201
ZNF23	10	0.13378	0.31958	1	5070	3	-0.34895	0.024621	0.10669	0.869522	1745	2	3.067
INO80	5	0.95495	0.95697	1	17564	0	0	0.024686	0.083355	0.869522	1746	4	0.43877
NBPF12	4	0.6117	0.67612	1	12894	1	-0.2474	0.024695	0.076065	0.869522	1747	2	2.2549
TTI2	5	0.62936	0.7392	1	13034	1	-1.1933	0.024747	0.083467	0.869522	1748	3	1.4759
KPRP	5	0.87888	0.88915	1	16010	1	-0.53082	0.0248	0.083468	0.869522	1749	2	0.83459
CIR1	5	0.058639	0.1387	0.854472	3030	2	-0.55184	0.024809	0.083468	0.869522	1750	2	0.73089
POTEF	5	0.98122	0.98266	1	18102	0	0	0.024819	0.083468	0.869522	1751	4	0.30756
MBD3L2	5	0.54485	0.69501	1	12257	1	-0.24442	0.024868	0.083468	0.869522	1752	1	2.0385
VSX1	5	0.82336	0.83811	1	15103	1	-0.21921	0.024889	0.08358	0.869522	1753	4	0.27099
C12orf75	5	0.49852	0.64608	1	11536	1	-0.47657	0.024916	0.083693	0.869522	1754	2	2.3995
KIAA1429	5	0.96046	0.96193	1	17668	0	0	0.024921	0.083693	0.869522	1755	4	0.27199
HEXIM2	10	0.97935	0.98303	1	18057	1	-0.1164	0.02493	0.11113	0.876193	1756	7	0.2718
ARHGAP28	5	0.31745	0.49012	1	8740	1	-0.83294	0.024934	0.083693	0.869522	1757	4	0.37178
HIST1H3I	5	0.53107	0.68204	1	12038	2	-0.23032	0.024964	0.083693	0.869522	1758	2	1.3675
BCAN	5	0.60651	0.73158	1	12853	1	-0.22206	0.024972	0.083693	0.869522	1759	3	0.51247
RBM18	5	0.98913	0.99015	1	18273	0	0	0.024995	0.083693	0.869522	1760	4	0.3524
PDCD2L	4	0.94005	0.94347	1	17250	0	0	0.025036	0.076495	0.869522	1761	3	0.57157
CRMP1	10	0.95825	0.97242	1	17624	1	-0.30616	0.025044	0.11145	0.876193	1762	5	0.84076
TACSTD2	5	0.84425	0.85576	1	15430	1	-0.28179	0.025108	0.08389	0.869522	1763	2	2.4363
FBXO25	5	0.51947	0.66997	1	11845	1	-0.34401	0.02518	0.08389	0.869522	1764	3	0.41446
IP6K3	5	0.90679	0.9167	1	16585	0	0	0.025236	0.084014	0.869522	1765	3	0.40485
CPS1	5	0.88061	0.89052	1	16043	1	-0.097638	0.025253	0.084014	0.869522	1766	2	2.4979
S100A8	5	0.035341	0.084057	0.742855	2136	2	-0.40414	0.025259	0.084014	0.869522	1767	3	0.44477
DSTYK	5	0.61883	0.73517	1	12954	1	-0.32386	0.025267	0.084014	0.869522	1768	4	0.30349
DYRK1B	5	0.82448	0.83902	1	15121	1	-0.12097	0.025268	0.084014	0.869522	1769	3	0.45327
EPM2A	5	0.57224	0.71649	1	12601	1	-0.19485	0.025327	0.084015	0.869522	1770	4	0.86759
ZNF773	5	0.16975	0.32282	1	5913	2	-0.24715	0.02538	0.084129	0.869522	1771	3	0.52532
PPP2R2B	10	0.63305	0.82853	1	13060	2	-0.46418	0.025396	0.11218	0.876193	1772	6	0.59845
PLA2R1	5	0.98981	0.99068	1	18300	0	0	0.025408	0.084129	0.869522	1773	4	0.80854
LTB4R2	4	0.099661	0.20444	0.956611	4114	1	-0.92351	0.025424	0.07661	0.869522	1774	3	0.71837
VPS8	5	0.67471	0.75913	1	13445	1	-0.20561	0.025435	0.084129	0.869522	1775	3	0.49048
MYLK3	10	0.99851	0.99861	1	18591	0	0	0.025442	0.11218	0.876193	1776	7	0.28174
SFTPD	5	0.97588	0.97734	1	17990	0	0	0.02545	0.084129	0.869522	1777	3	0.56863
RTN4RL2	5	0.15984	0.30267	1	5679	1	-0.71333	0.025471	0.084129	0.869522	1778	2	0.65418
FXYD1	5	0.85161	0.86304	1	15533	1	-0.13959	0.025493	0.084129	0.869522	1779	2	3.1301
SYVN1	5	0.83954	0.85303	1	15355	1	-0.12368	0.025496	0.084129	0.869522	1780	3	0.46018
JAGN1	5	0.21779	0.40372	1	7145	2	-0.30785	0.025529	0.08432	0.869522	1781	3	0.46728
ANO7	5	0.78903	0.81628	1	14634	1	-0.38353	0.025544	0.084321	0.869522	1782	4	0.48282
GRAP2	5	0.26353	0.45149	1	7925	2	-0.34961	0.025576	0.08444	0.869522	1783	3	1.0031
GGCT	5	0.98953	0.99054	1	18287	0	0	0.025613	0.08444	0.869522	1784	4	0.42797
SOCS7	5	0.11214	0.22855	0.97123	4461	2	-0.38839	0.025638	0.08444	0.869522	1785	1	4.3697
C16orf72	10	0.51085	0.75528	1	11703	3	-0.84427	0.025698	0.11269	0.876193	1786	6	0.74764
SPATC1L	10	0.85456	0.9334	1	15587	1	-0.2246	0.025701	0.11279	0.876193	1787	7	0.46214
SQSTM1	6	0.28371	0.49171	1	8223	2	-0.30643	0.025712	0.10006	0.869522	1788	4	0.43007
SLC9A8	5	0.34524	0.51995	1	9169	1	-0.81202	0.02576	0.084548	0.869522	1789	4	0.36861
CLCF1	5	0.83539	0.84712	1	15285	1	-0.18891	0.025806	0.084675	0.869522	1790	4	0.48273
LPCAT1	10	0.28482	0.53994	1	8238	3	-0.2891	0.025821	0.11326	0.876658	1791	6	1.34
GHSR	5	0.82079	0.83767	1	15053	1	-0.1471	0.025836	0.084676	0.869522	1792	2	0.88187
CMBL	5	0.9785	0.97959	1	18041	0	0	0.025872	0.084806	0.869522	1793	4	0.34241
AADAT	5	0.11388	0.23246	0.97123	4512	1	-0.78832	0.025907	0.084921	0.869522	1794	2	0.69265
AFTPH	5	0.78163	0.81171	1	14532	1	-0.46885	0.025924	0.084922	0.869522	1795	4	0.37209
ECHDC1	5	0.95499	0.95716	1	17565	0	0	0.025937	0.085055	0.869522	1796	3	0.36284
DDX19B	10	0.81968	0.91945	1	15039	2	-0.20173	0.025952	0.11348	0.876658	1797	6	0.32489
DERL1	5	0.98745	0.98858	1	18230	0	0	0.025993	0.085055	0.869522	1798	4	0.44522
SF3B1	5	0.96054	0.96193	1	17671	0	0	0.026023	0.08518	0.869522	1799	4	0.55764
NAT10	5	0.78932	0.81628	1	14645	1	-0.69821	0.02606	0.08518	0.869522	1800	3	0.79795
ANXA5	5	0.92678	0.93688	1	16985	0	0	0.026083	0.085309	0.869522	1801	4	0.24141
SLA	5	0.90191	0.91184	1	16476	0	0	0.026112	0.085309	0.869522	1802	3	0.44421
FAM216B	5	0.91357	0.92507	1	16719	0	0	0.026152	0.08531	0.869522	1803	4	0.36695
HSPB8	5	0.52966	0.68034	1	12019	1	-0.32954	0.026164	0.08531	0.869522	1804	4	0.33581
WT1	5	0.24263	0.43354	1	7622	2	-0.31495	0.026176	0.08531	0.869522	1805	3	0.5059
SLC19A2	5	0.42266	0.57953	1	10393	1	-2.178	0.026212	0.085436	0.869522	1806	3	0.39319
NOVA2	5	0.56056	0.70959	1	12492	2	-0.10278	0.026215	0.085436	0.869522	1807	3	1.0095
SSPO	5	0.98988	0.99078	1	18303	0	0	0.026232	0.085551	0.869522	1808	4	0.36633
SEZ6	8	0.24548	0.47151	1	7661	1	-0.68633	0.026243	0.11536	0.882391	1809	4	0.57854
PUSL1	5	0.75103	0.7989	1	14204	1	-0.13601	0.026255	0.085551	0.869522	1810	4	0.18611
HIST1H1T	5	0.92201	0.93298	1	16886	0	0	0.026266	0.085661	0.869522	1811	3	0.40541
PLS3	5	0.7963	0.82042	1	14724	1	-0.42789	0.026274	0.085661	0.869522	1812	3	0.45753
ZNF804B	5	0.59518	0.72521	1	12784	1	-0.14094	0.026275	0.085661	0.869522	1813	2	0.58963
C10orf107	4	0.27945	0.42052	1	8171	2	-0.44203	0.026283	0.077676	0.869522	1814	2	0.97578
ZNF787	5	0.98629	0.98755	1	18206	0	0	0.026295	0.085661	0.869522	1815	4	0.40528
CLVS2	5	0.97662	0.97785	1	18001	0	0	0.026321	0.085661	0.869522	1816	4	0.42107
ATP5L2	5	0.96156	0.96288	1	17701	0	0	0.026331	0.085661	0.869522	1817	3	0.35635
NIP7	3	0.97363	0.97624	1	17945	0	0	0.026368	0.062291	0.869522	1818	3	0.96558
ERCC3	5	0.39085	0.55301	1	9912	2	-0.56956	0.026374	0.085854	0.869522	1819	3	0.57692
MAEA	10	0.26826	0.52482	1	7997	3	-1.9469	0.026414	0.11424	0.878162	1820	5	0.51949
PNCK	5	0.5491	0.70001	1	12314	2	-0.14406	0.026446	0.085976	0.869522	1821	3	0.43813
MTNR1A	5	0.75963	0.80442	1	14291	1	-0.83151	0.026474	0.085977	0.869522	1822	3	0.52511
CNKSR1	5	0.84734	0.85804	1	15476	1	-0.60547	0.02651	0.086085	0.869522	1823	2	0.84363
SERPINB8	5	0.32909	0.49867	1	8900	2	-0.27542	0.026528	0.086212	0.869522	1824	3	0.7978
ANK1	5	0.25516	0.44244	1	7795	2	-0.3149	0.026546	0.086213	0.869522	1825	3	1.0518
NFASC	5	0.32368	0.49482	1	8825	2	-0.2603	0.026551	0.086336	0.869522	1826	3	1.6264
FOXF1	5	0.95054	0.95414	1	17460	0	0	0.026564	0.086336	0.869522	1827	3	0.41868
OGFOD1	5	0.61963	0.73563	1	12958	1	-0.61661	0.026578	0.086336	0.869522	1828	4	0.70566
ZNF492	5	0.21886	0.40642	1	7164	1	-0.50556	0.026603	0.086336	0.869522	1829	3	0.48586
COLGALT2	5	0.98247	0.98389	1	18131	0	0	0.026619	0.086337	0.869522	1830	4	0.29299
MKNK2	10	0.33318	0.59359	1	8989	3	-0.49086	0.026636	0.11481	0.880487	1831	3	2.2053
FAM50B	5	0.90408	0.91332	1	16533	0	0	0.026682	0.086473	0.869522	1832	2	0.68498
FAM85B	5	0.96251	0.96418	1	17723	0	0	0.026689	0.086473	0.869522	1833	3	0.46554
CEP135	5	0.30601	0.47902	1	8544	1	-0.68231	0.026691	0.086473	0.869522	1834	2	0.80662
APOL1	5	0.16899	0.32157	1	5891	1	-0.84889	0.026695	0.086473	0.869522	1835	3	1.6196
CARS	5	0.24718	0.43484	1	7683	1	-3.1943	0.026809	0.086704	0.869522	1836	3	1.5247
TTYH2	10	0.0074825	0.026748	0.532876	806	6	-0.62326	0.026923	0.1197	0.882391	1837	3	2.1181
CCDC112	5	0.60192	0.72931	1	12819	1	-0.4033	0.026936	0.087027	0.869522	1838	2	0.66899
SDE2	5	0.839	0.85257	1	15347	1	-0.46793	0.026954	0.087027	0.869522	1839	3	1.0753
PCGF6	5	0.2394	0.42676	1	7571	1	-0.78585	0.026966	0.087028	0.869522	1840	4	0.35157
ZNF766	5	0.3988	0.55948	1	10049	2	-0.25975	0.026984	0.087028	0.869522	1841	1	2.0376
C11orf35	5	0.70592	0.77198	1	13744	1	-0.93317	0.02699	0.087028	0.869522	1842	2	0.63965
MTPN	5	0.23428	0.42261	1	7482	2	-0.28517	0.027036	0.087028	0.869522	1843	3	0.72091
GJA9	5	0.62814	0.73744	1	13027	1	-0.23553	0.02704	0.087225	0.869522	1844	4	0.40874
CACNA1F	5	0.96617	0.9681	1	17775	0	0	0.027071	0.087225	0.869522	1845	4	0.21854
PPP2R2D	5	0.68673	0.76555	1	13549	1	-0.24489	0.02708	0.087225	0.869522	1846	2	2.5955
ASB6	5	0.93883	0.94569	1	17226	0	0	0.027084	0.087225	0.869522	1847	3	0.38586
KCNB2	5	0.57261	0.71649	1	12603	1	-0.90677	0.027109	0.087225	0.869522	1848	3	1.3596
IL22RA2	5	0.90354	0.91259	1	16517	0	0	0.027118	0.087225	0.869522	1849	3	0.57706
CDC37	5	0.99138	0.99202	1	18343	0	0	0.027129	0.087225	0.869522	1850	4	0.633
UBE2S	5	0.87818	0.88777	1	15997	1	-0.1649	0.027173	0.087226	0.869522	1851	4	0.34185
GNG11	5	0.53199	0.68204	1	12050	1	-1.5543	0.027237	0.087226	0.869522	1852	2	1.207
ABCA13	5	0.80497	0.82544	1	14838	1	-0.16831	0.027298	0.087521	0.869522	1853	3	0.42079
RBBP4	5	0.22091	0.40979	1	7225	2	-0.54036	0.02732	0.087521	0.869522	1854	1	4.1699
E2F8	5	0.93589	0.94327	1	17168	0	0	0.027322	0.087521	0.869522	1855	3	0.42458
PDC	5	0.91562	0.92738	1	16772	0	0	0.027328	0.087521	0.869522	1856	2	0.87243
PEX1	5	0.71508	0.77566	1	13828	1	-0.51359	0.02733	0.087521	0.869522	1857	4	0.62011
WHSC1L1	5	0.85727	0.86815	1	15637	1	-0.15441	0.027398	0.087522	0.869522	1858	4	0.46907
ASCL1	5	0.28797	0.46665	1	8282	1	-0.30113	0.027408	0.087653	0.869522	1859	4	0.34198
STYXL1	5	0.0085888	0.021852	0.467761	876	1	-0.90501	0.027416	0.087653	0.869522	1860	2	1.0556
YWHAH	3	0.97253	0.97529	1	17915	0	0	0.027471	0.064652	0.869522	1861	3	0.27358
CELA3A	5	0.92508	0.93602	1	16945	0	0	0.027514	0.087653	0.869522	1862	4	0.23734
HSPBP1	5	0.88892	0.89974	1	16200	0	0	0.027521	0.087653	0.869522	1863	3	0.53571
SLC16A14	4	0.81204	0.8247	1	14931	1	-0.17172	0.027572	0.078733	0.869522	1864	3	0.66451
ADRA2B	5	0.43247	0.58603	1	10532	2	-0.26252	0.027608	0.087853	0.869522	1865	2	2.0634
WFDC8	5	0.96818	0.96959	1	17815	0	0	0.027656	0.087853	0.869522	1866	3	1.0178
KCNS1	5	0.4354	0.58757	1	10577	1	-0.49085	0.027659	0.087853	0.869522	1867	3	0.64672
DYNLRB1	10	0.23597	0.49332	1	7510	4	-1.0654	0.027664	0.12169	0.882391	1868	6	0.54689
PUS7	5	0.81471	0.83178	1	14961	1	-0.19335	0.027677	0.087853	0.869522	1869	3	0.65691
VANGL2	5	0.33973	0.51217	1	9083	1	-0.53566	0.027752	0.087854	0.869522	1870	2	2.28
NAP1L4	5	0.77973	0.81124	1	14511	1	-0.20666	0.027787	0.087854	0.869522	1871	4	0.46608
UBE2F	5	0.8714	0.88085	1	15887	1	-0.099998	0.02779	0.087854	0.869522	1872	4	0.20872
ANGPTL6	5	0.61501	0.73426	1	12919	1	-0.25999	0.027806	0.087982	0.869522	1873	2	1.1556
RFX6	5	0.40375	0.56214	1	10117	2	-0.20048	0.027853	0.088095	0.869522	1874	2	0.57801
OR52E8	5	0.98154	0.98298	1	18110	0	0	0.027901	0.088096	0.869522	1875	4	0.2964
LDB3	5	0.53737	0.68818	1	12138	1	-1.5109	0.027925	0.088205	0.869522	1876	4	0.37275
OGG1	5	0.89737	0.90797	1	16386	0	0	0.027932	0.088205	0.869522	1877	4	0.31208
MTHFD2	10	0.69737	0.86591	1	13657	2	-0.39691	0.027952	0.12225	0.882391	1878	4	0.44287
PAMR1	5	0.27955	0.46186	1	8174	2	-0.48491	0.027973	0.088205	0.869522	1879	2	0.63217
SERPINH1	5	0.20338	0.38251	1	6781	2	-0.41039	0.028037	0.088205	0.869522	1880	2	1.1892
ANKRD6	5	0.99068	0.99141	1	18322	0	0	0.028047	0.088205	0.869522	1881	4	0.34771
CCDC102A	5	0.87188	0.88179	1	15899	1	-0.18553	0.028068	0.088206	0.869522	1882	4	0.38609
EZH1	5	0.83665	0.84939	1	15304	1	-0.2028	0.028073	0.088206	0.869522	1883	3	0.5516
RPL3L	5	0.99142	0.99208	1	18348	0	0	0.028109	0.088206	0.869522	1884	4	0.36913
C10orf12	5	0.84017	0.85303	1	15362	1	-0.26591	0.028112	0.088206	0.869522	1885	2	2.3224
HOXB13	5	0.23194	0.42222	1	7448	2	-0.34151	0.028147	0.088206	0.869522	1886	3	0.37533
ASTN1	5	0.079619	0.1694	0.887821	3617	2	-0.43788	0.028157	0.088206	0.869522	1887	3	0.52948
MAN2A2	5	0.45163	0.6061	1	10814	2	-0.20123	0.028184	0.088206	0.869522	1888	2	1.6113
ELP2	5	0.20991	0.39022	1	6961	2	-1.2445	0.028214	0.088206	0.869522	1889	2	1.3284
KIAA1211L	5	0.12121	0.24369	0.97123	4721	2	-0.52667	0.028232	0.088326	0.869522	1890	1	2.0866
MEX3B	10	0.88522	0.94795	1	16133	2	-0.18862	0.028322	0.1224	0.882391	1891	7	0.34294
GMFB	5	0.74765	0.79799	1	14160	1	-0.33419	0.028328	0.088641	0.869522	1892	1	2.4761
JAKMIP3	4	0.93458	0.93732	1	17142	0	0	0.028328	0.079491	0.869522	1893	2	1.0342
ADAMTSL1	5	0.89654	0.90797	1	16366	0	0	0.028331	0.088641	0.869522	1894	3	0.33797
TSSK1B	5	0.74182	0.79161	1	14095	1	-0.1224	0.028347	0.088641	0.869522	1895	4	0.53367
ABCA8	5	0.8595	0.8695	1	15669	1	-0.079939	0.028354	0.088641	0.869522	1896	4	0.35551
ST8SIA2	5	0.64509	0.7428	1	13172	1	-0.31997	0.028396	0.088641	0.869522	1897	4	0.31226
MAGEB10	5	0.93893	0.94569	1	17229	0	0	0.0284	0.088641	0.869522	1898	3	0.4873
PTGDR2	5	0.48914	0.63934	1	11400	2	-0.498	0.02842	0.088641	0.869522	1899	3	0.57786
HNRNPR	5	0.93632	0.94356	1	17182	0	0	0.028425	0.088641	0.869522	1900	3	0.53238
DCTN6	5	0.84638	0.85759	1	15464	1	-0.64976	0.028477	0.08877	0.869522	1901	4	0.90326
SYNGR1	5	0.84486	0.85666	1	15441	1	-0.23764	0.028505	0.088884	0.869522	1902	4	0.26996
KLF14	5	0.98243	0.98389	1	18128	0	0	0.02853	0.088884	0.869522	1903	4	0.52208
CWF19L1	5	0.90314	0.91259	1	16505	0	0	0.028568	0.088885	0.869522	1904	3	0.67823
TDRD1	5	0.89473	0.9056	1	16321	0	0	0.028595	0.089022	0.869522	1905	2	1.1056
ZDHHC14	4	0.92538	0.928	1	16952	0	0	0.028596	0.079492	0.869522	1906	3	0.85242
LMOD2	5	0.20885	0.39022	1	6932	1	-1.0621	0.028607	0.089022	0.869522	1907	4	0.30601
C6orf106	5	0.48698	0.63819	1	11371	2	-0.3989	0.028616	0.089022	0.869522	1908	3	1.1499
SERPINB10	5	0.14846	0.28349	0.994898	5409	1	-0.55479	0.02864	0.089022	0.869522	1909	3	0.52908
FAM49B	10	0.023592	0.07992	0.740218	1606	6	-0.54752	0.028647	0.12274	0.882391	1910	2	3.0672
TMEM184B	5	0.78674	0.81582	1	14599	1	-0.18528	0.028665	0.089022	0.869522	1911	3	0.91078
ZNF654	5	0.10551	0.21783	0.969464	4265	2	-0.42916	0.02867	0.089022	0.869522	1912	3	0.34547
EIF3L	5	0.85447	0.86585	1	15586	1	-0.16039	0.02867	0.089022	0.869522	1913	3	1.0375
DCAF11	5	0.58745	0.72338	1	12713	1	-0.24871	0.028695	0.089022	0.869522	1914	4	0.31981
LGALS16	5	0.8322	0.84219	1	15243	1	-0.1888	0.028712	0.089022	0.869522	1915	2	1.1515
C3orf58	5	0.78266	0.81402	1	14544	1	-0.16825	0.028756	0.089022	0.869522	1916	4	0.24216
BRD1	5	0.020138	0.050702	0.676838	1415	3	-0.97589	0.028784	0.090182	0.869522	1917	2	2.5446
FSCN3	5	0.20869	0.39022	1	6928	2	-0.38283	0.028845	0.091213	0.869522	1918	3	0.42832
SMU1	2	0.47185	0.48256	1	11121	1	-0.81472	0.02889	0.047003	0.786579	1919	1	2.9762
LONRF1	5	0.36218	0.53697	1	9442	1	-0.57905	0.028912	0.091674	0.869522	1920	4	0.26241
KLHL1	5	0.34458	0.51733	1	9160	1	-0.37747	0.028941	0.091876	0.869522	1921	3	0.36798
GOLM1	4	0.42455	0.57707	1	10417	1	-0.34345	0.028955	0.07998	0.869522	1922	3	0.61374
MRPL18	4	0.02784	0.059379	0.694878	1817	2	-1.3626	0.028987	0.07998	0.869522	1923	1	3.5731
ACVR2B	5	0.72056	0.77797	1	13873	1	-0.2965	0.029092	0.092001	0.869522	1924	3	0.36029
RER1	5	0.8607	0.86992	1	15692	1	-0.11697	0.029136	0.092191	0.869522	1925	4	0.37315
GRIK4	5	0.25567	0.44244	1	7804	1	-0.60331	0.029149	0.0923	0.869522	1926	2	0.53201
TAF1A	5	0.30883	0.48289	1	8597	1	-0.24787	0.029188	0.092442	0.869522	1927	3	1.1516
SUGP1	5	0.22119	0.41031	1	7232	2	-0.4193	0.029215	0.092573	0.869522	1928	2	0.80704
ESM1	4	0.83852	0.85142	1	15338	0	0	0.029221	0.080105	0.869522	1929	2	1.161
MANF	5	0.44242	0.59355	1	10686	1	-0.37387	0.029224	0.092573	0.869522	1930	3	0.41097
BIRC3	5	0.9667	0.9686	1	17790	0	0	0.029234	0.092573	0.869522	1931	4	0.71326
ASL	5	0.95142	0.95482	1	17481	0	0	0.029254	0.092573	0.869522	1932	4	0.327
LAPTM5	5	0.90532	0.91484	1	16557	0	0	0.029315	0.092574	0.869522	1933	4	0.26632
PLAT	5	0.1133	0.23207	0.97123	4491	1	-0.74438	0.029326	0.092574	0.869522	1934	4	0.27369
NOLC1	5	0.67423	0.75913	1	13440	1	-0.51067	0.029333	0.092574	0.869522	1935	4	0.93659
DHX34	5	0.11216	0.22855	0.97123	4463	2	-0.33224	0.029337	0.092574	0.869522	1936	2	0.60271
TSHZ3	5	0.9883	0.98924	1	18250	0	0	0.029356	0.092574	0.869522	1937	4	0.41096
RNF43	5	0.90838	0.91852	1	16618	0	0	0.029358	0.092574	0.869522	1938	4	0.32492
THEG	10	0.55654	0.78222	1	12426	3	-0.2918	0.029374	0.12351	0.882391	1939	4	0.46129
LYRM2	5	0.82353	0.83811	1	15105	1	-0.21953	0.029391	0.092574	0.869522	1940	4	0.30052
ZNF720	5	0.84794	0.85893	1	15480	1	-0.17747	0.029412	0.092799	0.869522	1941	3	0.47979
RGS9BP	5	0.91125	0.92205	1	16670	0	0	0.029412	0.092799	0.869522	1942	4	0.56792
DHX15	5	0.69073	0.76603	1	13592	1	-0.97773	0.029417	0.092799	0.869522	1943	4	0.84587
GJB2	10	0.28174	0.53662	1	8197	2	-0.33882	0.029425	0.12351	0.882391	1944	6	0.53282
THNSL1	5	0.45483	0.6061	1	10860	1	-0.55411	0.029452	0.092915	0.869522	1945	3	0.41225
GNAO1	5	0.025011	0.062032	0.694878	1678	2	-0.62476	0.029498	0.092915	0.869522	1946	2	1.16
ZNF587	5	0.18816	0.35281	1	6430	1	-0.58332	0.029527	0.092916	0.869522	1947	4	0.25064
SUSD1	5	0.73634	0.78473	1	14029	1	-0.48235	0.029538	0.092916	0.869522	1948	4	0.60682
KIAA0556	5	0.92825	0.93807	1	17011	0	0	0.02958	0.092916	0.869522	1949	3	0.75993
MIER2	5	0.93642	0.94356	1	17186	0	0	0.029589	0.092916	0.869522	1950	4	0.17
SLC44A1	5	0.10385	0.21343	0.962822	4222	2	-0.45973	0.029621	0.093059	0.869522	1951	3	0.5472
PRODH	10	0.38559	0.64856	1	9837	1	-0.33507	0.029643	0.12786	0.882391	1952	7	0.21469
NT5C1A	5	0.70083	0.76974	1	13696	1	-0.27804	0.029669	0.093184	0.869522	1953	3	0.56687
GVQW1	5	0.16801	0.31881	1	5864	1	-0.41087	0.029671	0.093184	0.869522	1954	3	1.7522
CLCNKA	9	0.064273	0.17058	0.891542	3196	5	-0.33199	0.029742	0.1265	0.882391	1955	3	2.3315
EAPP	5	0.34814	0.52571	1	9217	1	-1.1603	0.029762	0.093311	0.869522	1956	4	0.53195
PDCD6IP	5	0.80595	0.8259	1	14852	1	-0.13435	0.029773	0.093311	0.869522	1957	3	0.50308
CSTF3	5	0.81318	0.83042	1	14946	1	-0.63244	0.029788	0.093311	0.869522	1958	4	0.70312
FASTKD1	5	0.2907	0.46963	1	8310	1	-0.29716	0.029795	0.093311	0.869522	1959	4	0.27379
RRAGC	5	0.52099	0.67155	1	11881	2	-0.21622	0.029863	0.093441	0.869522	1960	3	0.87006
DCUN1D2	5	0.96026	0.96193	1	17666	0	0	0.029864	0.093441	0.869522	1961	4	0.47891
MKRN2	5	0.94622	0.95037	1	17365	0	0	0.029882	0.093441	0.869522	1962	4	0.3574
AIRE	5	0.21717	0.40321	1	7131	1	-1.0833	0.029887	0.093441	0.869522	1963	3	0.61623
RNF128	5	0.92219	0.93329	1	16893	0	0	0.029897	0.093441	0.869522	1964	3	0.59379
BRCC3	5	0.98982	0.99068	1	18301	0	0	0.029944	0.093441	0.869522	1965	4	0.29218
LRRC47	10	0.18914	0.41289	1	6451	3	-0.21502	0.029945	0.12892	0.882391	1966	5	0.3596
SZT2	5	0.10982	0.22357	0.969464	4392	1	-1.1299	0.03001	0.093442	0.869522	1967	4	0.42453
LPIN1	5	0.83275	0.84354	1	15254	1	-0.25653	0.03001	0.093442	0.869522	1968	3	0.52848
SCYL2	5	0.039554	0.09448	0.769672	2311	2	-0.47603	0.030059	0.093442	0.869522	1969	3	0.44924
NKX2-8	5	0.47698	0.62706	1	11206	2	-0.10316	0.030097	0.093564	0.869522	1970	2	0.79574
TESPA1	9	0.59504	0.79635	1	12782	2	-0.4327	0.030229	0.12753	0.882391	1971	4	1.4823
OR5AN1	5	0.9623	0.96364	1	17718	0	0	0.030251	0.093703	0.869522	1972	4	0.3637
TNP2	5	0.95287	0.95614	1	17516	0	0	0.030259	0.093703	0.869522	1973	4	0.32875
PARD6G	5	0.40476	0.56214	1	10133	2	-0.25087	0.030268	0.093704	0.869522	1974	3	0.40111
FSTL1	5	0.82072	0.83767	1	15052	1	-0.54843	0.030292	0.093704	0.869522	1975	4	0.38053
AAMP	5	0.39906	0.55948	1	10054	1	-0.29854	0.030294	0.093704	0.869522	1976	3	0.68264
RNGTT	5	0.021596	0.054422	0.676838	1495	4	-1.0251	0.030342	0.093704	0.869522	1977	1	4.2057
FN3KRP	5	0.91372	0.92541	1	16725	0	0	0.030387	0.093704	0.869522	1978	4	0.24487
AK4	5	0.94411	0.94916	1	17335	0	0	0.030428	0.09383	0.869522	1979	4	0.27693
KIAA1211	10	0.076094	0.2092	0.962822	3517	4	-0.33751	0.030428	0.13349	0.885763	1980	6	0.37661
C6orf163	4	0.42416	0.57707	1	10411	1	-0.31919	0.030434	0.081314	0.869522	1981	3	0.54401
CCNF	5	0.21014	0.39123	1	6965	2	-0.57414	0.030442	0.093831	0.869522	1982	2	0.81003
PLEKHB1	5	0.12867	0.25535	0.984529	4932	1	-0.66133	0.030471	0.093954	0.869522	1983	3	0.88064
HIC1	5	0.99036	0.99123	1	18314	0	0	0.030472	0.093954	0.869522	1984	4	0.37703
EFCAB9	4	0.12353	0.24899	0.975233	4792	2	-0.39175	0.03048	0.081314	0.869522	1985	2	1.2552
PIK3C3	5	0.12051	0.24291	0.97123	4698	2	-0.42554	0.030512	0.093955	0.869522	1986	3	0.86
FERMT1	5	0.7783	0.81034	1	14494	1	-0.34603	0.030523	0.093955	0.869522	1987	4	0.34761
SF3A2	7	0.94838	0.95465	1	17417	1	-0.29233	0.030524	0.11205	0.876193	1988	5	0.44292
ASPH	5	0.89598	0.90679	1	16357	0	0	0.030553	0.094082	0.869522	1989	4	0.51053
SLC29A2	5	0.19541	0.36577	1	6596	2	-0.33128	0.030596	0.094082	0.869522	1990	2	0.40078
C22orf43	5	0.4708	0.61882	1	11104	2	-0.3793	0.030605	0.094082	0.869522	1991	3	0.58239
ZNF512	5	0.3285	0.49823	1	8890	2	-0.16501	0.030611	0.094082	0.869522	1992	3	0.37244
SPRR2B	9	0.35641	0.61925	1	9345	3	-0.42464	0.030621	0.12791	0.882391	1993	5	0.41702
HIPK1	5	0.88298	0.8919	1	16096	0	0	0.030644	0.094082	0.869522	1994	3	0.62478
2022-03-09	5	0.48416	0.6354	1	11319	1	-0.5056	0.030652	0.094082	0.869522	1995	3	0.57328
C1orf189	5	0.95835	0.9603	1	17628	0	0	0.030658	0.094082	0.869522	1996	3	0.33198
GNA11	5	0.68057	0.76095	1	13501	1	-0.22607	0.03066	0.094082	0.869522	1997	4	0.27541
SKOR1	5	0.52043	0.67103	1	11867	1	-0.18271	0.030675	0.094082	0.869522	1998	4	0.50936
THSD7B	5	0.9598	0.96155	1	17656	0	0	0.030727	0.094469	0.869522	1999	4	0.52393
[truncated: 16,789 more rows]
